# Supplementary material for: Deeply subducted continental fragments – Part 2: Insight from petrochronology in the central Sesia Zone (western Italian Alps)
Source: Copernicus journal article supplement (doi:10.5194/se-9-191-2018), 2018-02-26

Table of Contents

[S1 Sample description and GPS locations 3](#_Toc500925697)

[S1.1 IC - FG1324 Omphacite, garnet, glaucophane and rutile micaschist (Settimo Vittone, Valle d’Aosta). 3](#_Toc500925698)

[S1.2 IC - FG1315 Garnet, epidote and rutile quartz-micaschist (Rechantier, Lys Valley). 3](#_Toc500925699)

[S1.3: IC - FG12157 Garnet, glaucophane, epidote and rutile micaschist (Lillianes, Lys Valley). 4](#_Toc500925700)

[S1.4 IC - FG1347 Chlorithoid, garnet and rutile micaschist (Liévanere, Aosta Valley). 5](#_Toc500925701)

[S1.5 IC - FG1249 Garnet, epidote and rutile micaschist (Faye, Lys Valley). 5](#_Toc500925702)

[S1.6 EC - FG1420 Garnet orthogneiss (Mont Crabun, Nantey Valley, Aosta Valley). 6](#_Toc500925703)

[S1.7 EC -FG12107 Leucogneiss (summit of Mt Crabun, Aosta Valley). 7](#_Toc500925704)

[S2 Compositional maps for the garnet end-members of sample FG1420 8](#_Toc500925705)

[S3 Thermodynamic database 9](#_Toc500925706)

[S4 Chlorite and white mica multi-equilibrium 9](#_Toc500925707)

[S5 Mineral compositions 9](#_Toc500925708)

[S6 Modelling methods used for each sample 10](#_Toc500925709)

[S7 XRF analyses of major elements 10](#_Toc500925710)

[S8 GRTMOD results 11](#_Toc500925711)

[S8.1 FG1315 11](#_Toc500925712)

[S8.2 FG12157 24](#_Toc500925713)

[S8.3 FG1347 37](#_Toc500925714)

[S8.4 FG1249 66](#_Toc500925715)

[S8.5 FG1420 87](#_Toc500925716)

[S9 Allanite secondary standard ages 113](#_Toc500925717)

[S10 Zircon ages 113](#_Toc500925718)

[S11 Concordia diagrams of the Alpine age data for zircon 114](#_Toc500925719)

# S1 Sample description and GPS locations

In the following paragraphs are provided detailed description of the study samples as well as tables summarizing their metamorphic evolution.

## S1.1 IC - FG1324 Omphacite, garnet, glaucophane and rutile micaschist (Settimo Vittone, Valle d’Aosta).

Mode: quartz ~ 40%, phengite ~20%, omphacite ~15% glaucophane ~10%, garnet ~10% + minor epidote, chlorite, albite, rutile, opaques and zircon.

It displays a foliation with a spacing <mm marked by phengite, glaucophane and omphacite.

Glaucophane has a rim of green amphibole; omphacite is rimmed by albite + white mica. The garnet is 0.2-0.5 mm in size.

Allanite is aligned in the main foliation and rimmed by epidote. It preserves pre-Alpine monazite at the core.

| **MINERAL** | **Pre** | **Foliation** | **Post** |
| --- | --- | --- | --- |
| QUARTZ |  |  |  |
| PHENGITE |  |  |  |
| GLAUCOPHANE |  |  |  |
| OMPHACITE |  |  |  |
| GARNET |  |  |  |
| EPIDOTE |  | Allanite | Epidote |

**Table S1: Metamorphic evolution of sample FG1324.**

## S1.2 IC - FG1315 Garnet, epidote and rutile quartz-micaschist (Rechantier, Lys Valley).

Mode: quartz ~ 50%, micas (2/3 phengite, 1/3 paragonite) ~30%, garnet ~15%, minor epidote, chlorite, albite; accessory rutile, graphite, and zircon.

A strong foliation is highlighted by with quartz rich bands and phengite and paragonite rich layers with spacing <1 mm. In the field a stretching lineation is well visible, marked by micas and quartz as confirmed below the optical microscope where the quartz crystals show an optical preferred orientation. Garnet is from ca. 100 µm to several mm in size, with a pre-Alpine core and several Alpine rims. Atoll garnet occurs with phengite and quartz located inside the core. Allanite crystals are elongated in the main foliation; they show a clinozoisite rim, some tens of microns in size, and rare relics of pre-Alpine monazite preserved in the core. Chlorite and albite mark greenschist retrogression.

| **MINERAL** | **Pre** | **Foliation** | **Post** |
| --- | --- | --- | --- |
| QUARTZ |  |  |  |
| WHITE MICAS |  |  |  |
| GARNET |  |  |  |
| EPIDOTE |  | Allanite | Clinozoisite |
| CHLORITE |  |  |  |
| RUTILE |  |  |  |
| ALBITE |  |  |  |

**Table S2: Metamorphic evolution of sample FG1315.**

## S1.3: IC - FG12157 Garnet, glaucophane, epidote and rutile micaschist (Lillianes, Lys Valley).

Mode: quartz ~ 40%, phengite ~30%, garnet ~15%, ~10% glaucophane + epidote, remaining ~5% chlorite, albite, rutile, zircon, titanite, ilmenite and graphite.

The foliation is marked by phengite, glaucophane and allanite and is subsequently deformed by open folds. The glaucophane shows two growth zones, the second of which is more pleochroic (darker blue compared to the first one) with higher iron content than the first generation. Some crystals are rimmed by green amphibole. The allanite crystals show a core and one or two rims; these are rimmed by clinozoisite, some tens of microns in size.

The garnet (from ca. 100 µm to several mm in size) displays a pre-Alpine core and several Alpine rims.

Chlorite and albite occur marking the greenschist retrogression. Rutile is overgrown by titanite with ilmenite as outermost rim.

| **MINERAL** |  | **Foliation** |  | **Open folds** |  |
| --- | --- | --- | --- | --- | --- |
| PHENGITE |  |  |  |  |  |
| QUARTZ |  |  |  |  |  |
| GARNET |  |  |  |  |  |
| GLAUCOPHANE |  |  |  |  |  |
| ALLANITE |  |  |  |  |  |
| CHLORITE |  |  |  |  |  |
| RUTILE |  |  |  |  |  |
| TITANITE |  |  |  |  |  |
| ALBITE |  |  |  |  |  |

**Table S3: Metamorphic evolution of sample FG12157.**

## S1.4 IC - FG1347 Chlorithoid, garnet and rutile micaschist (Liévanere, Aosta Valley).

Mode: quartz ~ 35%, micas (mostly phengite with minor paragonite) ~25%, chloritoid ~15% garnet ~15%, remaining ~10% epidote, chlorite, rutile, opaques and zircon.

The main foliation is marked by phengite, paragonite, chloritoid, allanite and rutile and wraps around large garnet porphyroblasts. In the field is visible a strong stretching lineation marked by the chloritoid. The chloritoid is present in two generations: the first marking the main foliation, the younger of which is poikiloblastic and includes the main foliation. The garnet (from ca. 100 µm to several mm in size) has a pre-Alpine core and several Alpine rims. Pre-Alpine monazites (100-200 µm) are preserved at the core of allanite and are partially overgrown by allanite and apatite symplectites. Allanite is rimmed by clinozoisite. Chlorite grows at the expense of the garnet rim and along brittle fractures.

| **MINERAL** | **Pre** | **Foliation** | **Post** |
| --- | --- | --- | --- |
| QUARTZ |  |  |  |
| WHITE MICAS |  |  |  |
| CHLORITOID |  | 1st generation | 2nd generation |
| GARNET |  |  |  |
| RUTILE |  |  |  |
| EPIDOTE |  | Allanite | Clinozoisite |

**Table S4: Metamorphic evolution of sample FG1347.**

## S1.5 IC - FG1249 Garnet, epidote and rutile micaschist (Faye, Lys Valley).

Mode: quartz ~ 40%, micas (2/3 phengite, 1/3 paragonite) ~40%, garnet ~15%, remaining ~5% epidote, chlorite, albite, rutile, glaucophane, zircon and opaques.

The foliation is marked by the preferred orientation of phengite, paragonite, allanite, rutile and wraps around garnet porphyrocrysts. Allanite is present in two generations and is rimmed by epidote; it rarely preserves monazite (probably pre-Alpine) at the core. The garnet (from ca. 100 µm to several mm in size) shows pre-Alpine core and several Alpine rims.

Rare glaucophane is partially overgrown by albite and green amphibole. Chlorite and albite occur marking the greenschist retrogression.

| **MINERAL** | **Pre** | **Foliation** | **Post** |
| --- | --- | --- | --- |
| WHITE MICAS |  |  |  |
| QUARTZ |  |  |  |
| GARNET |  |  |  |
| EPIDOTE |  | Allanite | Epidote |
| RUTILE |  |  |  |
| ALBITE |  |  |  |
| GLAUCOPHANE |  |  |  |

**Table S5: Metamorphic evolution of sample FG1249.**

## S1.6 EC - FG1420 Garnet orthogneiss (Mont Crabun, Nantey Valley, Aosta Valley).

Mode: quartz ~ 35%, phengite ~35%, albite ~15%; garnet ~5%, remaining ~10% chlorite, epidote, K-feldspar, biotite, titanite, zircon, opaques and apatite.

This sample shows a millimetric foliation marked by phengite and chlorite.

The garnet has a grain size up to one centimetre and a red colour in the outcrop. It overgrows a foliation marked by quartz, epidote and titanite, discordant with the main foliation, and shows magmatic allanite as inclusions. The garnet crystals are wrapped by the main foliation; in the pressure shadows crystallize quartz, chlorite and phengite.

Alpine allanite has a grain size up to 100 µm and is rimmed by epidote. Rare monazite of few microns is visible at the core of the Alpine allanite.

| **MINERAL** |  |  | **Pre** | **Main foliation** | **Post** |
| --- | --- | --- | --- | --- | --- |
| PHENGITE |  |  |  |  |  |
| QUARTZ |  |  |  |  |  |
| GARNET |  |  |  |  |  |
| EPIDOTE | Magm Aln | Ep | Met Aln | Ep | Ep |
| CHLORITE |  |  |  |  |  |
| ALBITE |  |  |  |  |  |
| TITANITE |  |  |  |  |  |

**Table S6 Metamorphic evolution of sample FG1420.**

## S1.7 EC -FG12107 Leucogneiss (summit of Mt Crabun, Aosta Valley).

Mode: albite ~ 40%, phengite ~30%, quartz ~20%; remaining ~10% epidote, chlorite, actinolite, titanite, zircon and sulphides.

The foliation is marked by albite, phengite and chlorite.

Alpine allanite has a grain size up to one hundred microns and is rimmed by epidote.

| **MINERAL** | **Pre** | **Main foliation** | **Post** |
| --- | --- | --- | --- |
| ALBITE |  |  |  |
| PHENGITE |  |  |  |
| QUARTZ |  |  |  |
| EPIDOTE | Met Aln | Ep | Ep |
| CHLORITE |  |  |  |
| ACTINOLITE |  |  |  |
| TITANITE |  |  |  |

**Table S7 Metamorphic evolution of sample FG12107.**

| **COMPLEX** | **SAMPLE** | **UTM ED 1950, 32N X/Y (m)** | |
| --- | --- | --- | --- |
| IC | FG1324 | 409039 | 5045383 |
| IC | FG1315 | 408514 | 5051580 |
| IC | FG12157 | 409683 | 5054033 |
| IC | FG1247 | 406318 | 5052474 |
| IC | FG1249 | 406637 | 5053931 |
| EC | FG1420 | 405188 | 5057108 |
| EC | FG12107 | 405452 | 5057561 |

**Table S8 Location of the studied samples.**

# S2 Compositional maps for the garnet end-members of sample FG1420

**
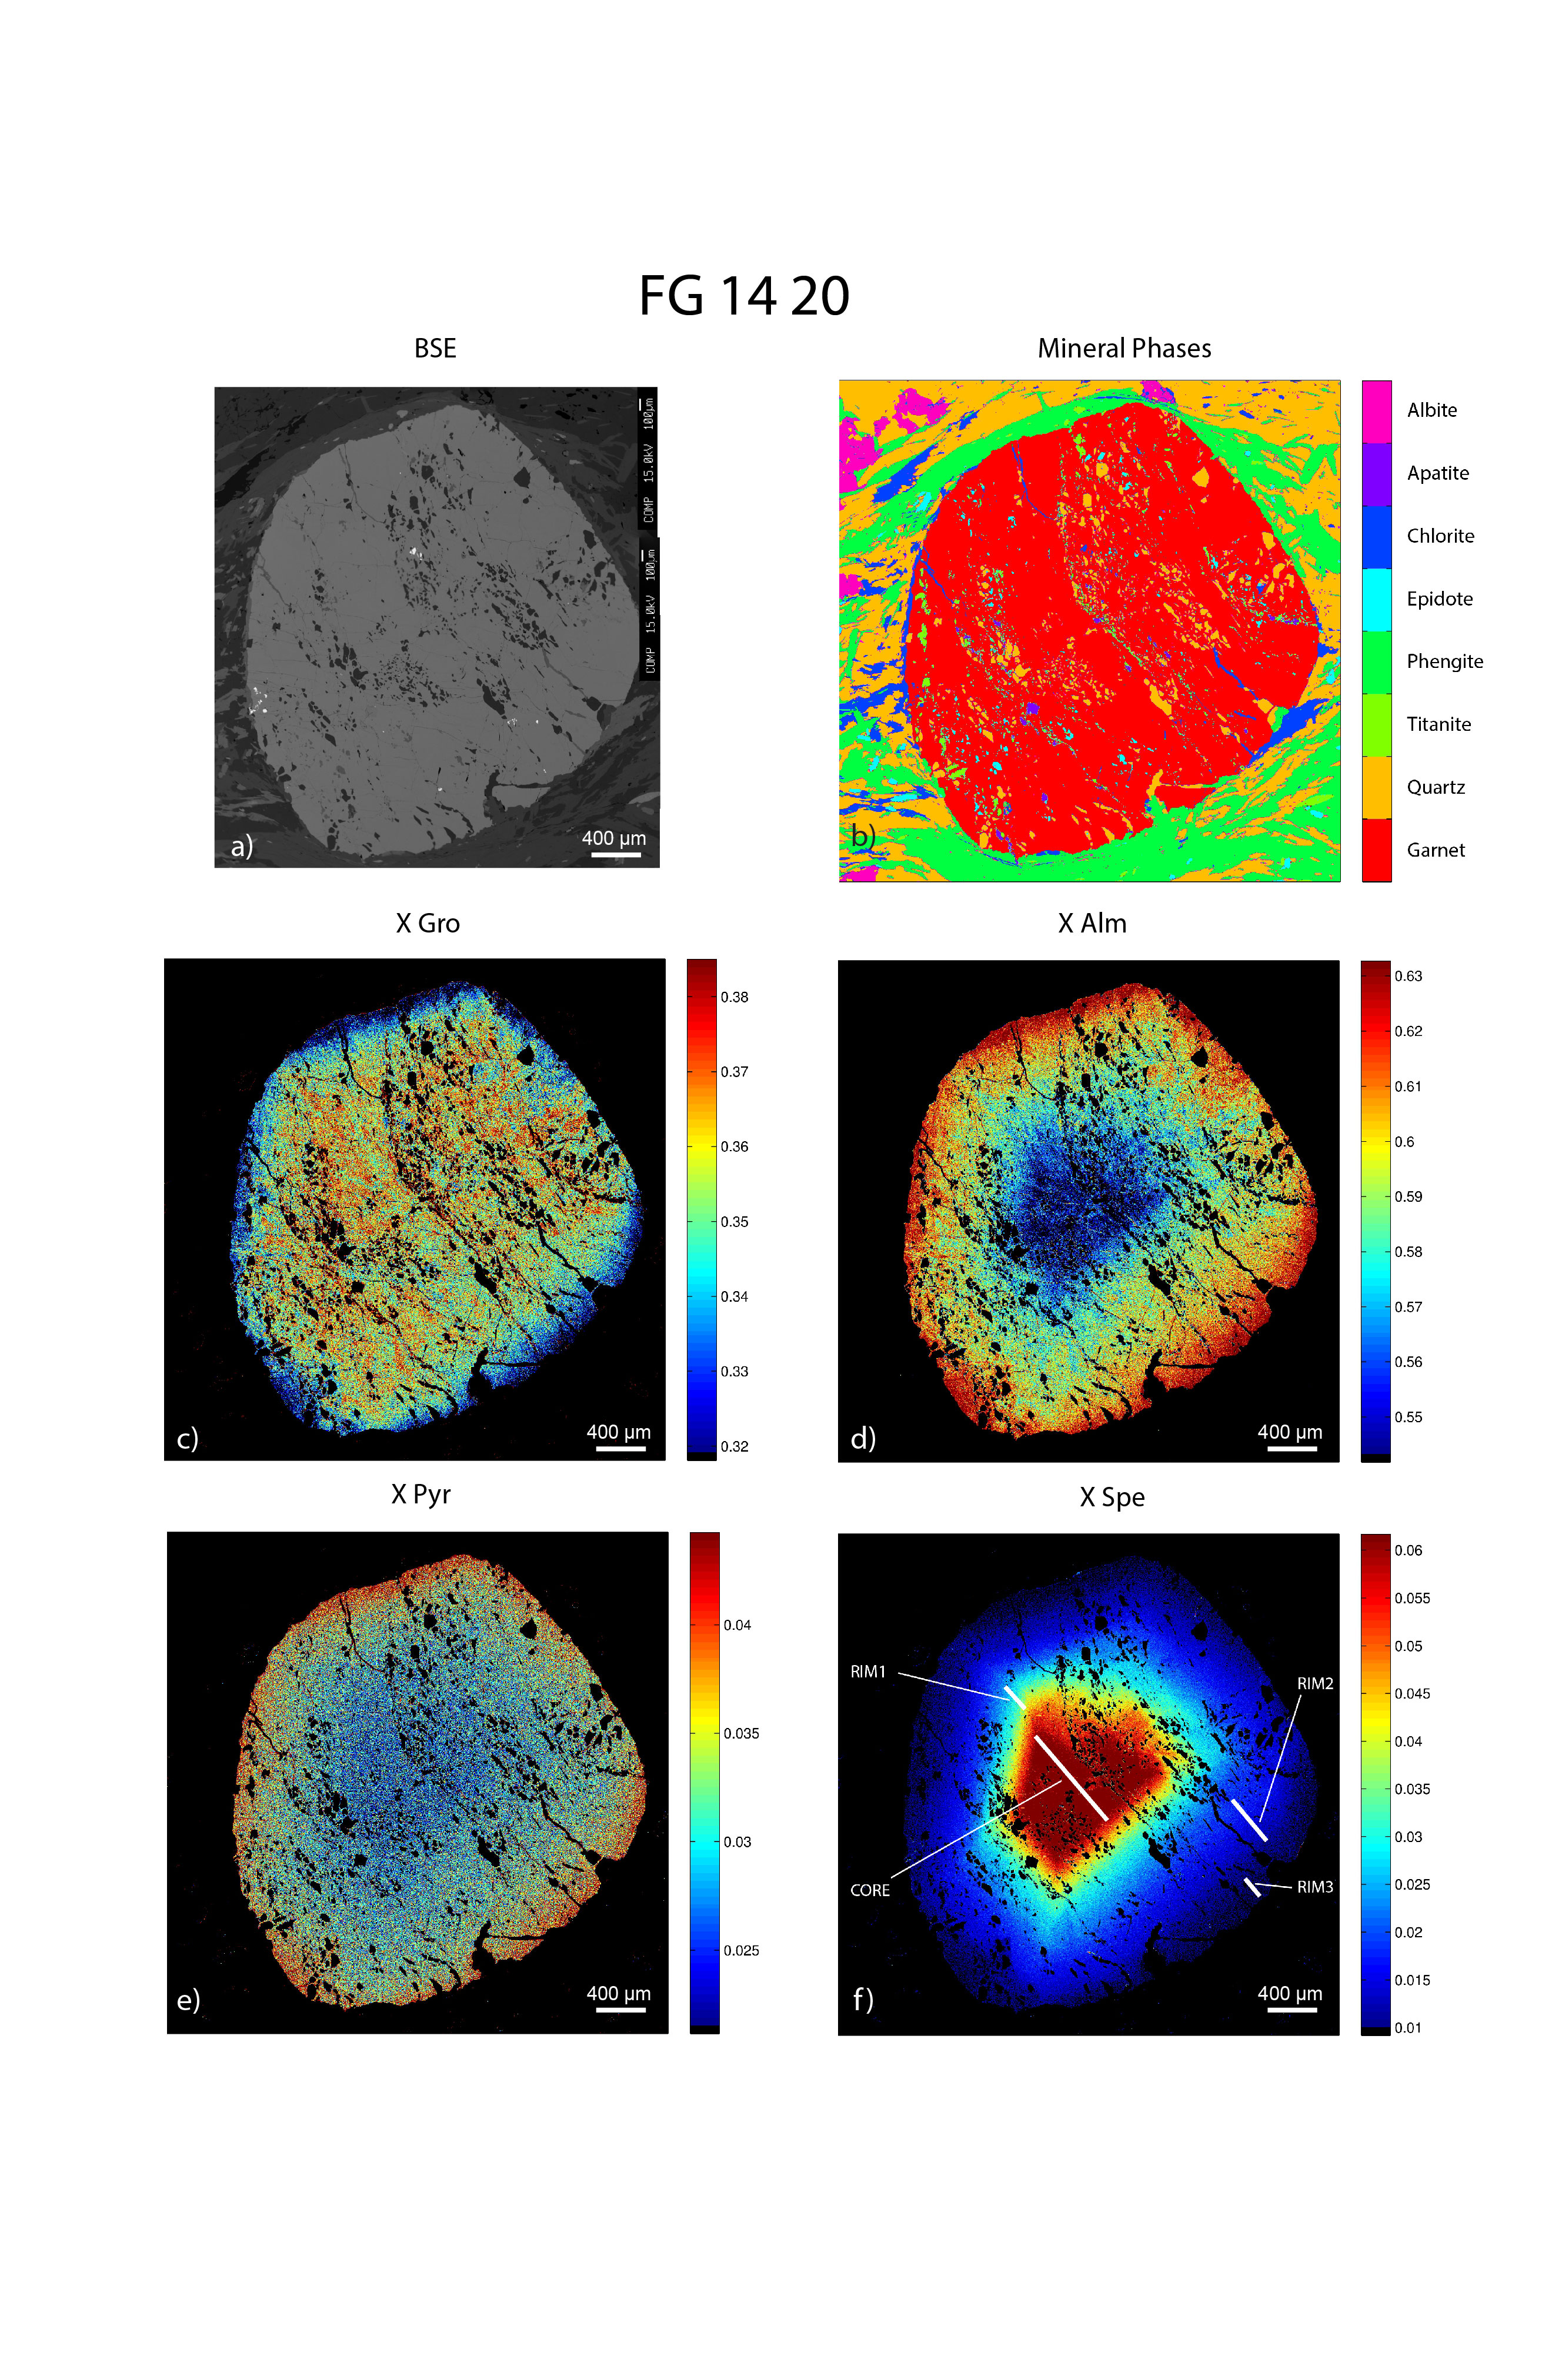
**

**Figure S1: Millimetric garnet in sample FG1420. a) BSE picture. b) Mineral phases X-ray map. c) d), e) and f) Standardized X-ray map for the XGrs, XAlm, XPrp and XSps maps respectively. Note the garnet zoning reflects continuous growth well visible from XSps.**

# S3 Thermodynamic database

In the Excel document (S3 Thermodynamic database) is available the thermodynamic database used for the computation of the *Isochemical phase diagrams*

# S4 Chlorite and white mica multi-equilibrium

Chl-Phg-Qtz equilibria used for modeling:

- 4 Clinochlore + 4 Daphnite - 5 Fe-Amesite + 5 Mg-Amesite

14 alpha-Quartz - 4 Daphnite + 5 Fe-Amesite + 3 Mg-Amesite - 6 Sudoite + 8 WATER

- 10 Mg-Celadonite + 15 alpha-Quartz - 2 Daphnite + 10 Fe-Celadonite + 2 Mg-Amesite - 4 Pyrophyllite + Sudoite

75 alpha-Quartz - 2 Clinochlore + 2 Daphnite - 10 Fe-Celadonite + 10 Muscovite - 20 Pyrophyllite + 5 Sudoite

- 5 Mg-Celadonite + Clinochlore + 4 Daphnite - 5 Fe-Amesite + 5 Muscovite

2 Fe-Amesite - 8 Fe-Celadonite + 13 Mg-Amesite + 8 Muscovite + 14 Pyrophyllite - 26 Sudoite + 30 WATER

# S5 Mineral compositions

In the Excel document (S5 Mineral compositions) tables are reported the mineral compositions of the main phases and compared with the modeled compositions. Furthermore, in the tables are also provided the predicted assemblages for the different stages as well as the bulk compositions used.

# S6 Modelling methods used for each sample

|  | **Method used** | | | | |
| --- | --- | --- | --- | --- | --- |
| **SAMPLE** | **GrtMod** | **Garnet isopleths (Theriak)** | **Si apfu in Phe**  **(Theriak)** | **XMg in Phe**  **(Theriak)** | **Chl-Wm multiequilibria** |
| **FG1324** |  | **X** | **X** | **X** |  |
| **FG1315** | **X** |  | **X** | **X** | **X** |
| **FG12157** | **X** |  | **X** | **X** | **X** |
| **FG1247** | **X** |  | **X** | **X** | **X** |
| **FG1249** | **X** |  | **X** | **X** |  |
| **FG1420** | **X** |  | **X** | **X** | **X** |

**Table S9: Summary of the modelling method used for each sample.**

# S7 XRF analyses of major elements

| **MAJOR ELEMENTS**  **wt - %** | **Internal Complex** | | | | | **External Complex** | |
| --- | --- | --- | --- | --- | --- | --- | --- |
| **FG1324** | **FG1315** | **FG1347** | **FG12157** | **FG1249** | **FG1420** | **FG12107** |
| **SiO2** | 67.18 | 64.09 | 58.47 | 60.36 | 58.82 | 60.44 | 73.65 |
| **TiO2** | 0.69 | 0.95 | 1.12 | 1.03 | 1.03 | 0.71 | 0.04 |
| **Al2O3** | 14.36 | 17.12 | 20.39 | 16.51 | 18.87 | 19.04 | 14.94 |
| **Fe2O3** | 5.8 | 7.78 | 9.94 | 8.84 | 9.58 | 6.13 | 0.69 |
| **MnO** | 0.08 | 0.08 | 0.08 | 0.1 | 0.23 | 0.11 | 0.01 |
| **MgO** | 2.58 | 2.34 | 2.85 | 3.29 | 2.76 | 2.13 | 0.24 |
| **CaO** | 1.93 | 0.72 | 0.39 | 2.09 | 1.6 | 2.1 | 0.37 |
| **Na2O** | 2.8 | 1.05 | 0.54 | 1.19 | 0.88 | 1.73 | 7.14 |
| **K2O** | 2.71 | 3.13 | 3.26 | 3.57 | 3.94 | 4.6 | 1.41 |
| **P2O5** | 0.18 | 0.1 | 0.1 | 0.14 | 0.13 | 0.21 | 0.1 |
| **LOI** | 1.36 | 2.06 | 2.44 | 2.01 | 1.58 | 2.73 | 0.67 |
| **Cr2O3** | 0.01 | 0.01 | 0.02 | 0.02 | 0.02 | 0 | 0 |
| **NiO** | 0 | 0.01 | 0.01 | 0.01 | 0.01 | 0 | 0 |
| **Sum** | 99.69 | 99.43 | 99.6 | 99.15 | 99.44 | 99.94 | 99.25 |

**Table S10: XRF analyses of major elements of the studied samples**

# S8 GRTMOD results

## S8.1 FG1315

################# STAGE 1/4 #################

*** New computation (see details below)

PARAMETERS -------------------------------

Alm Gro Pyr Spe

FIT: 0.685 0.037 0.279 0.000

WEIGHT: 4430 420 1240 90

*** OPTIMIZATION 1

INPUT VARIABLES --------------------------------------------------------------------------

1 2 3 4 5 6 7 8 9 10

TC: 600 600 800 800 0 0 0 0 0 0

P: 8000 16000 8000 16000 0 0 0 0 0 0

LIMITS -------------------

MIN MAX

V1: 2.000 40.000

________________________________________________

>> RUN 1/4 ## OPTIMIZATION 1 ## STAGE[1] ##

TC0 = 600 & P0 = 8000

... OPTIMIZATION COMPLETED (91 s)...

SI(1.0666)AL(0.33582)FE(0.097286)MN(0)MG(0.058065)CA(0.012839)NA(0.033882)TI(0.0122)K(0.066454)H(1)O(?)O(0) * FG13-15

TC = 751.4749 & P = 8234.707

Composition of GARNET: Alm(0.68451) # Gro(0.03653) # Pyr(0.27896) # Spe(0)

Volume fraction of GARNET = 13.9441 (in vol-% of the system)

Subsystem volume fraction = 100 (in vol-% of the system)

Density of GARNET/MATRIX = 4.0288/2.7165 (in g/ccm)

Residue = 4.3869e-05

--> SOLUTION (residue is lower than STOL [0.05])

________________________________________________

>> RUN 2/4 ## OPTIMIZATION 1 ## STAGE[1] ##

TC0 = 600 & P0 = 16000

... OPTIMIZATION COMPLETED (168 s)...

SI(1.0666)AL(0.33582)FE(0.097286)MN(0)MG(0.058065)CA(0.012839)NA(0.033882)TI(0.0122)K(0.066454)H(1)O(?)O(0) * FG13-15

TC = 841.308 & P = 12277.9744

Composition of GARNET: Alm(0.626) # Gro(0.042072) # Pyr(0.33193) # Spe(0)

Volume fraction of GARNET = 17.6388 (in vol-% of the system)

Subsystem volume fraction = 100 (in vol-% of the system)

Density of GARNET/MATRIX = 3.9833/2.7137 (in g/ccm)

Residue = 0.079171

________________________________________________

>> RUN 3/4 ## OPTIMIZATION 1 ## STAGE[1] ##

TC0 = 800 & P0 = 8000

... OPTIMIZATION COMPLETED (52 s)...

SI(1.0666)AL(0.33582)FE(0.097286)MN(0)MG(0.058065)CA(0.012839)NA(0.033882)TI(0.0122)K(0.066454)H(1)O(?)O(0) * FG13-15

TC = 751.2221 & P = 8235.3091

Composition of GARNET: Alm(0.68441) # Gro(0.036561) # Pyr(0.27903) # Spe(0)

Volume fraction of GARNET = 13.9517 (in vol-% of the system)

Subsystem volume fraction = 100 (in vol-% of the system)

Density of GARNET/MATRIX = 4.0288/2.7166 (in g/ccm)

Residue = 0.00016974

--> SOLUTION (residue is lower than STOL [0.05])

________________________________________________

>> RUN 4/4 ## OPTIMIZATION 1 ## STAGE[1] ##

TC0 = 800 & P0 = 16000

... OPTIMIZATION COMPLETED (103 s)...

SI(1.0666)AL(0.33582)FE(0.097286)MN(0)MG(0.058065)CA(0.012839)NA(0.033882)TI(0.0122)K(0.066454)H(1)O(?)O(0) * FG13-15

TC = 844.6368 & P = 12366.6987

Composition of GARNET: Alm(0.62599) # Gro(0.042133) # Pyr(0.33187) # Spe(0)

Volume fraction of GARNET = 17.641 (in vol-% of the system)

Subsystem volume fraction = 100 (in vol-% of the system)

Density of GARNET/MATRIX = 3.9831/2.714 (in g/ccm)

Residue = 0.079139

___________________________________________________________________

>> STAGE[1] ## AUTO-REFINEMENT - SOLUTION (1/1 - Optimization: 1)

SI(1.0666)AL(0.33582)FE(0.097286)MN(0)MG(0.058065)CA(0.012839)NA(0.033882)TI(0.0122)K(0.066454)H(1)O(?)O(0) * FG13-15

T = 751.4749 & P = 8234.707

Res = 4.3869e-05

--> Loop [1] - (8)

--> Loop [2] - (2)

--> Loop [3] - (2)

--> Loop [4] - (2)

--> Loop [5] - (2)

--> Loop [6] - (2)

--> Loop [7] - (2)

--> Loop [8] - (2)

--> Loop [9] - (1)

--> Loop [10] - (1)

--> Loop [11] - (1)

--> Loop [12] - (1)

--> Loop [13] - (0)

Garn Volume = 13.9441 +/- 0.94294 vol-%

################# STAGE 2/4 #################

*** New computation (see details below)

PARAMETERS -------------------------------

Alm Gro Pyr Spe

FIT: 0.607 0.187 0.206 0.000

WEIGHT: 3800 2520 940 65

==> GO FAST MODE (OPTI = 2 # OPTP: 650 - 15000)

*** OPTIMIZATION 2

INPUT VARIABLES --------------------------------------------------------------------------

1 2 3 4 5 6 7 8 9 10

TC: 650 0 0 0 0 0 0 0 0 0

P: 15000 0 0 0 0 0 0 0 0 0

X1: 10.25 0.00 0.00 0.00 0.00 0.00 0.00 0.00 0.00 0.00

LIMITS -------------------

MIN MAX

V1: 10.000 10.500

V2: 1.000 99.000

________________________________________________

>> RUN 1/1 ## OPTIMIZATION 2 ## STAGE[2] ##

TC0 = 650 & P0 = 15000

X0-1 = 10.25

... OPTIMIZATION COMPLETED (50 s)...

SI(1.141)AL(0.32202)FE(0.039565)MN(0)MG(0.037668)CA(0.011056)NA(0.039624)TI(0.014246)K(0.077681)H(1)O(?)O(0) * FG13-15

TC = 649.0793 & P = 15249.0795

X-1 = 10.2558

----

Composition of GARNET: Alm(0.60727) # Gro(0.18631) # Pyr(0.20642) # Spe(0)

Volume fraction of GARNET = 5.5414 (in vol-% of the system)

Subsystem volume fraction = 89.7442 (in vol-% of the system)

Density of GARNET/MATRIX = 3.9931/2.7885 (in g/ccm)

Residue = 0.00086729

--> SOLUTION (residue is lower than STOL [0.05])

___________________________________________________________________

>> STAGE[2] ## AUTO-REFINEMENT - SOLUTION (1/1 - Optimization: 1)

SI(1.141)AL(0.32202)FE(0.039565)MN(0)MG(0.037668)CA(0.011056)NA(0.039624)TI(0.014246)K(0.077681)H(1)O(?)O(0) * FG13-15

T = 649.0793 & P = 15249.0795

X-1 = 10.2558

Res = 0.00086729

--> Loop [1] - (5)

--> Loop [2] - (2)

--> Loop [3] - (1)

--> Loop [4] - (1)

--> Loop [5] - (1)

--> Loop [6] - (1)

--> Loop [7] - (1)

--> Loop [8] - (1)

--> Loop [9] - (1)

--> Loop [10] - (0)

Garn Volume = 5.5414 +/- 0.21724 vol-%

################# STAGE 3/4 #################

*** New computation (see details below)

PARAMETERS -------------------------------

Alm Gro Pyr Spe

FIT: 0.647 0.115 0.238 0.000

WEIGHT: 4200 1670 1030 75

==> GO FAST MODE (OPTI = 2 # OPTP: 650 - 19000)

*** OPTIMIZATION 2

INPUT VARIABLES --------------------------------------------------------------------------

1 2 3 4 5 6 7 8 9 10

TC: 650 0 0 0 0 0 0 0 0 0

P: 19000 0 0 0 0 0 0 0 0 0

X1: 7.95 0.00 0.00 0.00 0.00 0.00 0.00 0.00 0.00 0.00

X2: 2.95 0.00 0.00 0.00 0.00 0.00 0.00 0.00 0.00 0.00

LIMITS -------------------

MIN MAX

V1: 7.900 8.000

V2: 2.900 3.000

V3: 1.000 99.000

________________________________________________

>> RUN 1/1 ## OPTIMIZATION 2 ## STAGE[3] ##

TC0 = 650 & P0 = 19000

X0-1 = 7.95

X0-2 = 2.95

... OPTIMIZATION COMPLETED (80 s)...

SI(1.1997)AL(0.33842)FE(0.043621)MN(0)MG(0.041576)CA(0.0074192)NA(0.041674)TI(0.014983)K(0.081709)H(1)O(?)O(0) * FG13-15

TC = 649.9722 & P = 19030.6611

X-1 = 7.9614

X-2 = 2.9519

----

Composition of GARNET: Alm(0.64732) # Gro(0.11516) # Pyr(0.23752) # Spe(0)

Volume fraction of GARNET = 5.6115 (in vol-% of the system)

Subsystem volume fraction = 89.0867 (in vol-% of the system)

Density of GARNET/MATRIX = 4.0335/2.8163 (in g/ccm)

Residue = 1.9486e-05

--> SOLUTION (residue is lower than STOL [0.05])

___________________________________________________________________

>> STAGE[3] ## AUTO-REFINEMENT - SOLUTION (1/1 - Optimization: 1)

SI(1.1997)AL(0.33842)FE(0.043621)MN(0)MG(0.041576)CA(0.0074192)NA(0.041674)TI(0.014983)K(0.081709)H(1)O(?)O(0) * FG13-15

T = 649.9722 & P = 19030.6611

X-1 = 7.9614

X-2 = 2.9519

Res = 1.9486e-05

--> Loop [1] - (8)

--> Loop [2] - (8)

--> Loop [3] - (8)

--> Loop [4] - (8)

--> Loop [5] - (2)

--> Loop [6] - (2)

--> Loop [7] - (2)

--> Loop [8] - (1)

--> Loop [9] - (1)

--> Loop [10] - (1)

--> Loop [11] - (1)

--> Loop [12] - (1)

--> Loop [13] - (1)

--> Loop [14] - (1)

--> Loop [15] - (0)

Garn Volume = 5.6115 +/- 0.089461 vol-%

################# STAGE 4/4 #################

*** New computation (see details below)

PARAMETERS -------------------------------

Alm Gro Pyr Spe

FIT: 0.698 0.058 0.244 0.000

WEIGHT: 4450 820 1170 50

==> GO FAST MODE (OPTI = 2 # OPTP: 650 - 18000)

*** OPTIMIZATION 2

INPUT VARIABLES --------------------------------------------------------------------------

1 2 3 4 5 6 7 8 9 10

TC: 650 0 0 0 0 0 0 0 0 0

P: 18000 0 0 0 0 0 0 0 0 0

X1: 3.50 0.00 0.00 0.00 0.00 0.00 0.00 0.00 0.00 0.00

X2: 2.25 0.00 0.00 0.00 0.00 0.00 0.00 0.00 0.00 0.00

X3: 2.50 0.00 0.00 0.00 0.00 0.00 0.00 0.00 0.00 0.00

LIMITS -------------------

MIN MAX

V1: 3.000 4.000

V2: 2.000 2.500

V3: 2.000 3.000

V4: 1.000 99.000

________________________________________________

>> RUN 1/1 ## OPTIMIZATION 2 ## STAGE[4] ##

TC0 = 650 & P0 = 18000

X0-1 = 3.5

X0-2 = 2.25

X0-3 = 2.5

... OPTIMIZATION COMPLETED (185 s)...

SI(1.2007)AL(0.35037)FE(0.064528)MN(0)MG(0.050027)CA(0.0068852)NA(0.040645)TI(0.01462)K(0.079631)H(1)O(?)O(0) * FG13-15

TC = 669.7767 & P = 18016.5718

X-1 = 3.0049

X-2 = 2.5

X-3 = 2.5002

----

Composition of GARNET: Alm(0.6667) # Gro(0.074809) # Pyr(0.25849) # Spe(0)

Volume fraction of GARNET = 8.6335 (in vol-% of the system)

Subsystem volume fraction = 91.9949 (in vol-% of the system)

Density of GARNET/MATRIX = 4.045/2.8084 (in g/ccm)

Residue = 0.037977

--> SOLUTION (residue is lower than STOL [0.05])

___________________________________________________________________

>> STAGE[4] ## AUTO-REFINEMENT - SOLUTION (1/1 - Optimization: 1)

SI(1.2007)AL(0.35037)FE(0.064528)MN(0)MG(0.050027)CA(0.0068852)NA(0.040645)TI(0.01462)K(0.079631)H(1)O(?)O(0) * FG13-15

T = 669.7767 & P = 18016.5718

X-1 = 3.0049

X-2 = 2.5

X-3 = 2.5002

Res = 0.037977

--> Loop [1] - (8)

--> Loop [2] - (8)

--> Loop [3] - (7)

--> Loop [4] - (6)

--> Loop [5] - (6)

--> Loop [6] - (6)

--> Loop [7] - (5)

--> Loop [8] - (5)

--> Loop [9] - (5)

--> Loop [10] - (5)

--> Loop [11] - (5)

--> Loop [12] - (5)

--> Loop [13] - (5)

--> Loop [14] - (5)

--> Loop [15] - (5)

--> Loop [16] - (3)

--> Loop [17] - (3)

--> Loop [18] - (3)

--> Loop [19] - (2)

--> Loop [20] - (2)

--> Loop [21] - (2)

--> Loop [22] - (1)

--> Loop [23] - (1)

--> Loop [24] - (1)

--> Loop [25] - (1)

--> Loop [26] - (1)

--> Loop [27] - (1)

--> Loop [28] - (1)

--> Loop [29] - (1)

--> Loop [30] - (1)

--> Loop [31] - (1)

--> Loop [32] - (1)

--> Loop [33] - (1)

--> Loop [34] - (1)

--> Loop [35] - (1)

--> Loop [36] - (1)

--> Loop [37] - (1)

--> Loop [38] - (0)

Garn Volume = 8.6335 +/- 0.57618 vol-%

-----------------------------------

| FINAL RESULTS |

-----------------------------------

-> GARNET RESORPTION (vol-%)

Grt1 Grt2 Grt3 Grt4 Total

Stage 1 0.000 0.000 0.000 0.000 0.000

Stage 2 3.688 0.000 0.000 0.000 3.688

Stage 3 2.294 2.589 0.000 0.000 4.884

Stage 4 4.956 0.452 3.111 0.000 8.520

-> VOLUME OF GARNET (vol-%)

Grt1 Grt2 Grt3 Grt4 Total

Stage 1 13.944 0.000 0.000 0.000 13.944

Stage 2 10.256 5.541 0.000 0.000 15.797

Stage 3 7.961 2.952 5.612 0.000 16.525

Stage 4 3.005 2.500 2.500 8.634 16.639

-> NEWLY GROWN GARNET (vol-%)

Grt1 Grt2 Grt3 Grt4 Total

Stage 1 13.944 0.000 0.000 0.000 13.944

Stage 2 0.000 5.541 0.000 0.000 5.541

Stage 3 0.000 0.000 5.612 0.000 5.612

Stage 4 0.000 0.000 0.000 8.634 8.634

-> ROCK DENSITY (g/ccm)

Density

Stage 1 2.900

Stage 2 2.982

Stage 3 3.016

Stage 4 3.012

## S8.2 FG12157

################# STAGE 1/3 #################

*** New computation (see details below)

PARAMETERS -------------------------------

Alm Gro Pyr Spe

FIT: 0.703 0.040 0.257 0.000

WEIGHT: 3750 420 1270 18

*** OPTIMIZATION 1

INPUT VARIABLES --------------------------------------------------------------------------

1 2 3 4 5 6 7 8 9 10

TC: 600 600 800 800 0 0 0 0 0 0

P: 8000 16000 8000 16000 0 0 0 0 0 0

LIMITS -------------------

MIN MAX

V1: 4.000 40.000

________________________________________________

>> RUN 1/4 ## OPTIMIZATION 1 ## STAGE[1] ##

TC0 = 600 & P0 = 8000

... OPTIMIZATION COMPLETED (69 s)...

SI(1.0045)AL(0.32385)FE(0.11065)MN(0)MG(0.081638)CA(0.037268)NA(0.038399)TI(0.013228)K(0.075796)H(1)O(?)O(0) * FG12-157

TC = 851.0042 & P = 6030.8838

Composition of GARNET: Alm(0.68719) # Gro(0.0528) # Pyr(0.26001) # Spe(0)

Volume fraction of GARNET = 10.5029 (in vol-% of the system)

Subsystem volume fraction = 100 (in vol-% of the system)

Density of GARNET/MATRIX = 4.0135/2.6347 (in g/ccm)

Residue = 0.020631

________________________________________________

>> RUN 2/4 ## OPTIMIZATION 1 ## STAGE[1] ##

TC0 = 600 & P0 = 16000

... OPTIMIZATION COMPLETED (106 s)...

SI(1.0045)AL(0.32385)FE(0.11065)MN(0)MG(0.081638)CA(0.037268)NA(0.038399)TI(0.013228)K(0.075796)H(1)O(?)O(0) * FG12-157

TC = 674.5178 & P = 17494.4874

Composition of GARNET: Alm(0.62343) # Gro(0.11082) # Pyr(0.26575) # Spe(0)

Volume fraction of GARNET = 19.8226 (in vol-% of the system)

Subsystem volume fraction = 100 (in vol-% of the system)

Density of GARNET/MATRIX = 4.0096/2.8739 (in g/ccm)

Residue = 0.10696

________________________________________________

>> RUN 3/4 ## OPTIMIZATION 1 ## STAGE[1] ##

TC0 = 800 & P0 = 8000

... OPTIMIZATION COMPLETED (75 s)...

SI(1.0045)AL(0.32385)FE(0.11065)MN(0)MG(0.081638)CA(0.037268)NA(0.038399)TI(0.013228)K(0.075796)H(1)O(?)O(0) * FG12-157

TC = 899.9797 & P = 6141.6123

Composition of GARNET: Alm(0.69316) # Gro(0.050473) # Pyr(0.25636) # Spe(0)

Volume fraction of GARNET = 7.1092 (in vol-% of the system)

Subsystem volume fraction = 100 (in vol-% of the system)

Density of GARNET/MATRIX = 4.0124/2.6775 (in g/ccm)

Residue = 0.014518

--> SOLUTION (residue is lower than STOL [0.02])

________________________________________________

>> RUN 4/4 ## OPTIMIZATION 1 ## STAGE[1] ##

TC0 = 800 & P0 = 16000

... OPTIMIZATION COMPLETED (90 s)...

SI(1.0045)AL(0.32385)FE(0.11065)MN(0)MG(0.081638)CA(0.037268)NA(0.038399)TI(0.013228)K(0.075796)H(1)O(?)O(0) * FG12-157

TC = 899.555 & P = 6173.7573

Composition of GARNET: Alm(0.69057) # Gro(0.050494) # Pyr(0.25894) # Spe(0)

Volume fraction of GARNET = 7.3815 (in vol-% of the system)

Subsystem volume fraction = 100 (in vol-% of the system)

Density of GARNET/MATRIX = 4.0106/2.6758 (in g/ccm)

Residue = 0.016456

--> SOLUTION (residue is lower than STOL [0.02])

___________________________________________________________________

>> STAGE[1] ## AUTO-REFINEMENT - SOLUTION (1/1 - Optimization: 1)

SI(1.0045)AL(0.32385)FE(0.11065)MN(0)MG(0.081638)CA(0.037268)NA(0.038399)TI(0.013228)K(0.075796)H(1)O(?)O(0) * FG12-157

T = 899.9797 & P = 6141.6123

Res = 0.014518

--> Loop [1] - (5)

--> Loop [2] - (3)

--> Loop [3] - (1)

--> Loop [4] - (1)

--> Loop [5] - (1)

--> Loop [6] - (1)

--> Loop [7] - (1)

--> Loop [8] - (1)

--> Loop [9] - (0)

Garn Volume = 7.1092 +/- 2.3824 vol-%

################# STAGE 2/3 #################

*** New computation (see details below)

PARAMETERS -------------------------------

Alm Gro Pyr Spe

FIT: 0.642 0.158 0.200 0.000

WEIGHT: 3280 1820 980 10

==> GO FAST MODE (OPTI = 2 # OPTP: 650 - 16000)

*** OPTIMIZATION 2

INPUT VARIABLES --------------------------------------------------------------------------

1 2 3 4 5 6 7 8 9 10

TC: 650 0 0 0 0 0 0 0 0 0

P: 16000 0 0 0 0 0 0 0 0 0

X1: 5.55 0.00 0.00 0.00 0.00 0.00 0.00 0.00 0.00 0.00

LIMITS -------------------

MIN MAX

V1: 4.000 7.109

V2: 3.000 99.000

________________________________________________

>> RUN 1/1 ## OPTIMIZATION 2 ## STAGE[2] ##

TC0 = 650 & P0 = 16000

X0-1 = 5.5546

... OPTIMIZATION COMPLETED (82 s)...

SI(1.0381)AL(0.3157)FE(0.08112)MN(0)MG(0.074582)CA(0.038422)NA(0.041752)TI(0.014351)K(0.082684)H(1)O(?)O(0) * FG12-157

TC = 649.4117 & P = 16067.5674

X-1 = 5.7325

----

Composition of GARNET: Alm(0.64172) # Gro(0.1582) # Pyr(0.20008) # Spe(0)

Volume fraction of GARNET = 10.8101 (in vol-% of the system)

Subsystem volume fraction = 94.2675 (in vol-% of the system)

Density of GARNET/MATRIX = 4.0214/2.8581 (in g/ccm)

Residue = 6.8726e-06

--> SOLUTION (residue is lower than STOL [0.02])

___________________________________________________________________

>> STAGE[2] ## AUTO-REFINEMENT - SOLUTION (1/1 - Optimization: 1)

SI(1.0381)AL(0.3157)FE(0.08112)MN(0)MG(0.074582)CA(0.038422)NA(0.041752)TI(0.014351)K(0.082684)H(1)O(?)O(0) * FG12-157

T = 649.4117 & P = 16067.5674

X-1 = 5.7325

Res = 6.8726e-06

--> Loop [1] - (5)

--> Loop [2] - (3)

--> Loop [3] - (2)

--> Loop [4] - (0)

Garn Volume = 10.8101 +/- 0.65117 vol-%

################# STAGE 3/3 #################

*** New computation (see details below)

PARAMETERS -------------------------------

Alm Gro Pyr Spe

FIT: 0.595 0.238 0.167 0.000

WEIGHT: 3000 2920 720 8

*** OPTIMIZATION 1

INPUT VARIABLES --------------------------------------------------------------------------

1 2 3 4 5 6 7 8 9 10

TC: 600 600 800 800 0 0 0 0 0 0

P: 8000 16000 8000 16000 0 0 0 0 0 0

LIMITS -------------------

MIN MAX

V1: 4.000 5.733

V2: 3.000 10.810

V3: 4.000 99.000

ADJUSTEMENTS ------

VOL (%)

GRT-1: 5.733

GRT-2: 10.810

________________________________________________

>> RUN 1/4 ## OPTIMIZATION 1 ## STAGE[3] ##

TC0 = 600 & P0 = 8000

... OPTIMIZATION COMPLETED (7 s)...

TC = 600 & P = 8000

Volume fraction of GARNET = 0 (in vol-% of the system)

Subsystem volume fraction = 83.4574 (in vol-% of the system)

Density of GARNET/MATRIX = 0/2.7514 (in g/ccm)

Residue = 10000000000000000000

________________________________________________

>> RUN 2/4 ## OPTIMIZATION 1 ## STAGE[3] ##

TC0 = 600 & P0 = 16000

... OPTIMIZATION COMPLETED (40 s)...

TC = 600 & P = 16000

Volume fraction of GARNET = 0.76372 (in vol-% of the system)

Subsystem volume fraction = 83.4574 (in vol-% of the system)

Density of GARNET/MATRIX = 4.0532/2.8706 (in g/ccm)

Residue = 10000000000000000000

________________________________________________

>> RUN 3/4 ## OPTIMIZATION 1 ## STAGE[3] ##

TC0 = 800 & P0 = 8000

... OPTIMIZATION COMPLETED (7 s)...

TC = 800 & P = 8000

Volume fraction of GARNET = 0 (in vol-% of the system)

Subsystem volume fraction = 83.4574 (in vol-% of the system)

Density of GARNET/MATRIX = 0/2.6916 (in g/ccm)

Residue = 10000000000000000000

________________________________________________

>> RUN 4/4 ## OPTIMIZATION 1 ## STAGE[3] ##

TC0 = 800 & P0 = 16000

... OPTIMIZATION COMPLETED (88 s)...

SI(1.1866)AL(0.32552)FE(0.036522)MN(0)MG(0.072833)CA(0.030967)NA(0.051572)TI(0.017672)K(0.10261)H(1)O(?)O(0) * FG12-157

TC = 753.5268 & P = 15695.1843

Composition of GARNET: Alm(0.49993) # Gro(0.23025) # Pyr(0.26981) # Spe(0)

Volume fraction of GARNET = 4.0001 (in vol-% of the system)

Subsystem volume fraction = 83.4574 (in vol-% of the system)

Density of GARNET/MATRIX = 3.9017/2.7801 (in g/ccm)

Residue = 0.1403

--> TEMPORARY SOLUTION (to be used as input for optimization 2)

...

==> SOLUTION (1) is selected for OPTIMIZATION 2

*** OPTIMIZATION 2

INPUT VARIABLES --------------------------------------------------------------------------

1 2 3 4 5 6 7 8 9 10

TC: 754 754 754 0 0 0 0 0 0 0

P: 15695 15695 15695 0 0 0 0 0 0 0

X1: 5.73 4.00 4.87 0.00 0.00 0.00 0.00 0.00 0.00 0.00

X2: 10.81 3.00 6.91 0.00 0.00 0.00 0.00 0.00 0.00 0.00

LIMITS -------------------

MIN MAX

V1: 4.000 5.733

V2: 3.000 10.810

V3: 4.000 99.000

________________________________________________

>> RUN 1/3 ## OPTIMIZATION 2 ## STAGE[3] ##

TC0 = 753.5268 & P0 = 15695.1843

X0-1 = 5.7325

X0-2 = 10.81

... OPTIMIZATION COMPLETED (70 s)...

SI(1.1866)AL(0.32552)FE(0.036522)MN(0)MG(0.072833)CA(0.030967)NA(0.051572)TI(0.017672)K(0.10261)H(1)O(?)O(0) * FG12-157

TC = 753.5268 & P = 15695.1843

X-1 = 5.7325

X-2 = 10.81

----

Composition of GARNET: Alm(0.49993) # Gro(0.23025) # Pyr(0.26981) # Spe(0)

Volume fraction of GARNET = 4.0001 (in vol-% of the system)

Subsystem volume fraction = 83.4574 (in vol-% of the system)

Density of GARNET/MATRIX = 3.9017/2.7801 (in g/ccm)

Residue = 0.1403

________________________________________________

>> RUN 2/3 ## OPTIMIZATION 2 ## STAGE[3] ##

TC0 = 753.5268 & P0 = 15695.1843

X0-1 = 4

X0-2 = 3

... OPTIMIZATION COMPLETED (104 s)...

SI(1.0814)AL(0.32411)FE(0.077852)MN(0)MG(0.076966)CA(0.036195)NA(0.044012)TI(0.015121)K(0.087223)H(1)O(?)O(0) * FG12-157

TC = 644.9681 & P = 14011.2544

X-1 = 4.2544

X-2 = 3.4846

----

Composition of GARNET: Alm(0.59485) # Gro(0.23835) # Pyr(0.1668) # Spe(0)

Volume fraction of GARNET = 10.5829 (in vol-% of the system)

Subsystem volume fraction = 92.2611 (in vol-% of the system)

Density of GARNET/MATRIX = 3.9803/2.7853 (in g/ccm)

Residue = 2.3182e-05

--> SOLUTION (residue is lower than STOL [0.02])

________________________________________________

>> RUN 3/3 ## OPTIMIZATION 2 ## STAGE[3] ##

TC0 = 753.5268 & P0 = 15695.1843

X0-1 = 4.8663

X0-2 = 6.905

... OPTIMIZATION COMPLETED (94 s)...

SI(1.1282)AL(0.32452)FE(0.058889)MN(0)MG(0.074792)CA(0.034369)NA(0.047394)TI(0.016262)K(0.094108)H(1)O(?)O(0) * FG12-157

TC = 645.0055 & P = 14012.9406

X-1 = 5.4197

X-2 = 6.4712

----

Composition of GARNET: Alm(0.59483) # Gro(0.23831) # Pyr(0.16686) # Spe(0)

Volume fraction of GARNET = 6.4999 (in vol-% of the system)

Subsystem volume fraction = 88.1091 (in vol-% of the system)

Density of GARNET/MATRIX = 3.9803/2.7942 (in g/ccm)

Residue = 6.0703e-05

--> SOLUTION (residue is lower than STOL [0.02])

___________________________________________________________________

>> STAGE[3] ## AUTO-REFINEMENT - SOLUTION (1/1 - Optimization: 1)

SI(1.0814)AL(0.32411)FE(0.077852)MN(0)MG(0.076966)CA(0.036195)NA(0.044012)TI(0.015121)K(0.087223)H(1)O(?)O(0) * FG12-157

T = 644.9681 & P = 14011.2544

X-1 = 4.2544

X-2 = 3.4846

Res = 2.3182e-05

--> Loop [1] - (8)

--> Loop [2] - (5)

--> Loop [3] - (1)

--> Loop [4] - (1)

--> Loop [5] - (1)

--> Loop [6] - (1)

--> Loop [7] - (1)

--> Loop [8] - (1)

--> Loop [9] - (1)

--> Loop [10] - (1)

--> Loop [11] - (1)

--> Loop [12] - (0)

Garn Volume = 10.5829 +/- 0.44435 vol-%

-----------------------------------

| FINAL RESULTS |

-----------------------------------

-> GARNET RESORPTION (vol-%)

Grt1 Grt2 Grt3 Total

Stage 1 0.000 0.000 0.000 0.000

Stage 2 1.377 0.000 0.000 1.377

Stage 3 1.478 7.325 0.000 8.804

-> VOLUME OF GARNET (vol-%)

Grt1 Grt2 Grt3 Total

Stage 1 7.109 0.000 0.000 7.109

Stage 2 5.733 10.810 0.000 16.543

Stage 3 4.254 3.485 10.583 18.322

-> NEWLY GROWN GARNET (vol-%)

Grt1 Grt2 Grt3 Total

Stage 1 7.109 0.000 0.000 7.109

Stage 2 0.000 10.810 0.000 10.810

Stage 3 0.000 0.000 10.583 10.583

-> ROCK DENSITY (g/ccm)

Density

Stage 1 2.772

Stage 2 3.050

Stage 3 3.007

## S8.3 FG1347

################# STAGE 1/4 #################

*** New computation (see details below)

PARAMETERS -------------------------------

Alm Gro Pyr Spe

FIT: 0.691 0.032 0.277 0.000

WEIGHT: 2750 300 750 40

*** OPTIMIZATION 1

INPUT VARIABLES --------------------------------------------------------------------------

1 2 3 4 5 6 7 8 9 10

TC: 600 600 800 800 0 0 0 0 0 0

P: 8000 16000 8000 16000 0 0 0 0 0 0

LIMITS -------------------

MIN MAX

V1: 4.000 40.000

________________________________________________

>> RUN 1/4 ## OPTIMIZATION 1 ## STAGE[1] ##

TC0 = 600 & P0 = 8000

... OPTIMIZATION COMPLETED (83 s)...

SI(0.97304)AL(0.39996)FE(0.12443)MN(0)MG(0.07072)CA(0.0069544)NA(0.017425)TI(0.014384)K(0.069214)H(1)O(?)O(0) * FG13-47

TC = 705.0263 & P = 8003.5795

Composition of GARNET: Alm(0.69151) # Gro(0.032246) # Pyr(0.27624) # Spe(0)

Volume fraction of GARNET = 18.252 (in vol-% of the system)

Subsystem volume fraction = 100 (in vol-% of the system)

Density of GARNET/MATRIX = 4.0391/2.7883 (in g/ccm)

Residue = 0.0011576

--> SOLUTION (residue is lower than STOL [0.05])

________________________________________________

>> RUN 2/4 ## OPTIMIZATION 1 ## STAGE[1] ##

TC0 = 600 & P0 = 16000

... OPTIMIZATION COMPLETED (87 s)...

SI(0.97304)AL(0.39996)FE(0.12443)MN(0)MG(0.07072)CA(0.0069544)NA(0.017425)TI(0.014384)K(0.069214)H(1)O(?)O(0) * FG13-47

TC = 601.162 & P = 19995.8322

Composition of GARNET: Alm(0.67695) # Gro(0.039309) # Pyr(0.28374) # Spe(0)

Volume fraction of GARNET = 21.9181 (in vol-% of the system)

Subsystem volume fraction = 100 (in vol-% of the system)

Density of GARNET/MATRIX = 4.0662/2.884 (in g/ccm)

Residue = 0.01684

--> SOLUTION (residue is lower than STOL [0.05])

________________________________________________

>> RUN 3/4 ## OPTIMIZATION 1 ## STAGE[1] ##

TC0 = 800 & P0 = 8000

... OPTIMIZATION COMPLETED (38 s)...

SI(0.97304)AL(0.39996)FE(0.12443)MN(0)MG(0.07072)CA(0.0069544)NA(0.017425)TI(0.014384)K(0.069214)H(1)O(?)O(0) * FG13-47

TC = 776.9141 & P = 8144.5313

Composition of GARNET: Alm(0.69899) # Gro(0.031917) # Pyr(0.26909) # Spe(0)

Volume fraction of GARNET = 17.6632 (in vol-% of the system)

Subsystem volume fraction = 100 (in vol-% of the system)

Density of GARNET/MATRIX = 4.0367/2.754 (in g/ccm)

Residue = 0.011508

--> SOLUTION (residue is lower than STOL [0.05])

________________________________________________

>> RUN 4/4 ## OPTIMIZATION 1 ## STAGE[1] ##

TC0 = 800 & P0 = 16000

... OPTIMIZATION COMPLETED (80 s)...

SI(0.97304)AL(0.39996)FE(0.12443)MN(0)MG(0.07072)CA(0.0069544)NA(0.017425)TI(0.014384)K(0.069214)H(1)O(?)O(0) * FG13-47

TC = 601.039 & P = 19991.5756

Composition of GARNET: Alm(0.67695) # Gro(0.039309) # Pyr(0.28374) # Spe(0)

Volume fraction of GARNET = 21.918 (in vol-% of the system)

Subsystem volume fraction = 100 (in vol-% of the system)

Density of GARNET/MATRIX = 4.0662/2.884 (in g/ccm)

Residue = 0.01684

--> SOLUTION (residue is lower than STOL [0.05])

___________________________________________________________________

>> STAGE[1] ## AUTO-REFINEMENT - SOLUTION (1/3 - Optimization: 1)

SI(0.97304)AL(0.39996)FE(0.12443)MN(0)MG(0.07072)CA(0.0069544)NA(0.017425)TI(0.014384)K(0.069214)H(1)O(?)O(0) * FG13-47

T = 705.0263 & P = 8003.5795

Res = 0.0011576

--> Loop [1] - (8)

--> Loop [2] - (5)

--> Loop [3] - (3)

--> Loop [4] - (2)

--> Loop [5] - (2)

--> Loop [6] - (2)

--> Loop [7] - (2)

--> Loop [8] - (2)

--> Loop [9] - (0)

Garn Volume = 18.252 +/- 2.3052 vol-%

___________________________________________________________________

>> STAGE[1] ## AUTO-REFINEMENT - SOLUTION (2/3 - Optimization: 2)

SI(0.97304)AL(0.39996)FE(0.12443)MN(0)MG(0.07072)CA(0.0069544)NA(0.017425)TI(0.014384)K(0.069214)H(1)O(?)O(0) * FG13-47

T = 601.162 & P = 19995.8322

Res = 0.01684

--> Loop [1] - (3)

--> Loop [2] - (3)

--> Loop [3] - (3)

--> Loop [4] - (3)

--> Loop [5] - (3)

--> Loop [6] - (3)

--> Loop [7] - (3)

--> Loop [8] - (3)

--> Loop [9] - (3)

--> Loop [10] - (2)

--> Loop [11] - (2)

--> Loop [12] - (2)

--> Loop [13] - (2)

--> Loop [14] - (2)

--> Loop [15] - (2)

--> Loop [16] - (2)

--> Loop [17] - (1)

--> Loop [18] - (1)

--> Loop [19] - (0)

Garn Volume = 21.9181 +/- 3.3808 vol-%

___________________________________________________________________

>> STAGE[1] ## AUTO-REFINEMENT - SOLUTION (3/3 - Optimization: 3)

SI(0.97304)AL(0.39996)FE(0.12443)MN(0)MG(0.07072)CA(0.0069544)NA(0.017425)TI(0.014384)K(0.069214)H(1)O(?)O(0) * FG13-47

T = 776.9141 & P = 8144.5313

Res = 0.011508

--> Loop [1] - (8)

--> Loop [2] - (7)

--> Loop [3] - (7)

--> Loop [4] - (4)

--> Loop [5] - (3)

--> Loop [6] - (1)

--> Loop [7] - (1)

--> Loop [8] - (1)

--> Loop [9] - (1)

--> Loop [10] - (1)

--> Loop [11] - (1)

--> Loop [12] - (1)

--> Loop [13] - (1)

--> Loop [14] - (1)

--> Loop [15] - (1)

--> Loop [16] - (1)

--> Loop [17] - (1)

--> Loop [18] - (1)

--> Loop [19] - (1)

--> Loop [20] - (0)

Garn Volume = 17.6632 +/- 2.8008 vol-%

################# STAGE 2/4 #################

*** New computation (see details below)

PARAMETERS -------------------------------

Alm Gro Pyr Spe

FIT: 0.663 0.111 0.226 0.000

WEIGHT: 2600 1050 550 50

*** OPTIMIZATION 1

INPUT VARIABLES --------------------------------------------------------------------------

1 2 3 4 5 6 7 8 9 10

TC: 600 600 800 800 0 0 0 0 0 0

P: 8000 16000 8000 16000 0 0 0 0 0 0

LIMITS -------------------

MIN MAX

V1: 4.000 17.663

V2: 1.000 99.000

ADJUSTEMENTS ------

VOL (%)

GRT-1: 17.663

________________________________________________

>> RUN 1/4 ## OPTIMIZATION 1 ## STAGE[2] ##

TC0 = 600 & P0 = 8000

... OPTIMIZATION COMPLETED (14 s)...

TC = 600 & P = 8000

Volume fraction of GARNET = 0.6232 (in vol-% of the system)

Subsystem volume fraction = 82.3368 (in vol-% of the system)

Density of GARNET/MATRIX = 4.0183/2.79 (in g/ccm)

Residue = 10000000000000000000

________________________________________________

>> RUN 2/4 ## OPTIMIZATION 1 ## STAGE[2] ##

TC0 = 600 & P0 = 16000

... OPTIMIZATION COMPLETED (84 s)...

SI(1.0817)AL(0.39466)FE(0.026614)MN(0)MG(0.038027)CA(0.0027491)NA(0.022904)TI(0.018826)K(0.090912)H(1)O(?)O(0) * FG13-47

TC = 590.6289 & P = 19998.6217

Composition of GARNET: Alm(0.64585) # Gro(0.12541) # Pyr(0.22874) # Spe(0)

Volume fraction of GARNET = 2.0954 (in vol-% of the system)

Subsystem volume fraction = 82.3368 (in vol-% of the system)

Density of GARNET/MATRIX = 4.0408/2.8889 (in g/ccm)

Residue = 0.022388

--> TEMPORARY SOLUTION (to be used as input for optimization 2)

________________________________________________

>> RUN 3/4 ## OPTIMIZATION 1 ## STAGE[2] ##

TC0 = 800 & P0 = 8000

... OPTIMIZATION COMPLETED (82 s)...

SI(1.0817)AL(0.39466)FE(0.026614)MN(0)MG(0.038027)CA(0.0027491)NA(0.022904)TI(0.018826)K(0.090912)H(1)O(?)O(0) * FG13-47

TC = 806.4223 & P = 9045.2645

Composition of GARNET: Alm(0.63587) # Gro(0.04907) # Pyr(0.31506) # Spe(0)

Volume fraction of GARNET = 1.0444 (in vol-% of the system)

Subsystem volume fraction = 82.3368 (in vol-% of the system)

Density of GARNET/MATRIX = 3.9873/2.7417 (in g/ccm)

Residue = 0.11243

--> TEMPORARY SOLUTION (to be used as input for optimization 2)

________________________________________________

>> RUN 4/4 ## OPTIMIZATION 1 ## STAGE[2] ##

TC0 = 800 & P0 = 16000

... OPTIMIZATION COMPLETED (66 s)...

SI(1.0817)AL(0.39466)FE(0.026614)MN(0)MG(0.038027)CA(0.0027491)NA(0.022904)TI(0.018826)K(0.090912)H(1)O(?)O(0) * FG13-47

TC = 590.8106 & P = 19986.4189

Composition of GARNET: Alm(0.64577) # Gro(0.1246) # Pyr(0.22963) # Spe(0)

Volume fraction of GARNET = 2.1089 (in vol-% of the system)

Subsystem volume fraction = 82.3368 (in vol-% of the system)

Density of GARNET/MATRIX = 4.0407/2.8887 (in g/ccm)

Residue = 0.022101

--> TEMPORARY SOLUTION (to be used as input for optimization 2)

...

==> SOLUTION (3) is selected for OPTIMIZATION 2

*** OPTIMIZATION 2

INPUT VARIABLES --------------------------------------------------------------------------

1 2 3 4 5 6 7 8 9 10

TC: 591 591 591 0 0 0 0 0 0 0

P: 19986 19986 19986 0 0 0 0 0 0 0

X1: 17.66 4.00 10.83 0.00 0.00 0.00 0.00 0.00 0.00 0.00

LIMITS -------------------

MIN MAX

V1: 4.000 17.663

V2: 1.000 99.000

________________________________________________

>> RUN 1/3 ## OPTIMIZATION 2 ## STAGE[2] ##

TC0 = 590.8106 & P0 = 19986.4189

X0-1 = 17.6632

... OPTIMIZATION COMPLETED (16 s)...

SI(1.0817)AL(0.39466)FE(0.026614)MN(0)MG(0.038027)CA(0.0027491)NA(0.022904)TI(0.018826)K(0.090912)H(1)O(?)O(0) * FG13-47

TC = 590.8106 & P = 19986.4189

X-1 = 17.6632

----

Composition of GARNET: Alm(0.64577) # Gro(0.1246) # Pyr(0.22963) # Spe(0)

Volume fraction of GARNET = 2.1089 (in vol-% of the system)

Subsystem volume fraction = 82.3368 (in vol-% of the system)

Density of GARNET/MATRIX = 4.0407/2.8887 (in g/ccm)

Residue = 0.022101

--> SOLUTION (residue is lower than STOL [0.05])

________________________________________________

>> RUN 2/3 ## OPTIMIZATION 2 ## STAGE[2] ##

TC0 = 590.8106 & P0 = 19986.4189

X0-1 = 4

... OPTIMIZATION COMPLETED (171 s)...

SI(1.0522)AL(0.3961)FE(0.053224)MN(0)MG(0.046921)CA(0.0038932)NA(0.021413)TI(0.017617)K(0.085009)H(1)O(?)O(0) * FG13-47

TC = 595.021 & P = 14884.0748

X-1 = 13.5069

----

Composition of GARNET: Alm(0.66302) # Gro(0.11144) # Pyr(0.22554) # Spe(0)

Volume fraction of GARNET = 3.4736 (in vol-% of the system)

Subsystem volume fraction = 86.4931 (in vol-% of the system)

Density of GARNET/MATRIX = 4.0423/2.8583 (in g/ccm)

Residue = 1.9218e-05

--> SOLUTION (residue is lower than STOL [0.05])

________________________________________________

>> RUN 3/3 ## OPTIMIZATION 2 ## STAGE[2] ##

TC0 = 590.8106 & P0 = 19986.4189

X0-1 = 10.8316

... OPTIMIZATION COMPLETED (113 s)...

SI(1.0701)AL(0.39522)FE(0.037098)MN(0)MG(0.041531)CA(0.0031998)NA(0.022317)TI(0.01835)K(0.088586)H(1)O(?)O(0) * FG13-47

TC = 592.6305 & P = 19088.5935

X-1 = 16.0743

----

Composition of GARNET: Alm(0.66303) # Gro(0.11141) # Pyr(0.22556) # Spe(0)

Volume fraction of GARNET = 2.7956 (in vol-% of the system)

Subsystem volume fraction = 83.9257 (in vol-% of the system)

Density of GARNET/MATRIX = 4.052/2.8847 (in g/ccm)

Residue = 3.1559e-05

--> SOLUTION (residue is lower than STOL [0.05])

___________________________________________________________________

>> STAGE[2] ## AUTO-REFINEMENT - SOLUTION (1/3 - Optimization: 1)

SI(1.0817)AL(0.39466)FE(0.026614)MN(0)MG(0.038027)CA(0.0027491)NA(0.022904)TI(0.018826)K(0.090912)H(1)O(?)O(0) * FG13-47

T = 590.8106 & P = 19986.4189

X-1 = 17.6632

Res = 0.022101

--> Loop [1] - (1)

--> Loop [2] - (1)

--> Loop [3] - (1)

--> Loop [4] - (1)

--> Loop [5] - (1)

--> Loop [6] - (1)

--> Loop [7] - (0)

Garn Volume = 2.1089 +/- 0.13773 vol-%

___________________________________________________________________

>> STAGE[2] ## AUTO-REFINEMENT - SOLUTION (2/3 - Optimization: 2)

SI(1.0522)AL(0.3961)FE(0.053224)MN(0)MG(0.046921)CA(0.0038932)NA(0.021413)TI(0.017617)K(0.085009)H(1)O(?)O(0) * FG13-47

T = 595.021 & P = 14884.0748

X-1 = 13.5069

Res = 1.9218e-05

--> Loop [1] - (5)

--> Loop [2] - (2)

--> Loop [3] - (2)

--> Loop [4] - (2)

--> Loop [5] - (2)

--> Loop [6] - (2)

--> Loop [7] - (2)

--> Loop [8] - (2)

--> Loop [9] - (2)

--> Loop [10] - (2)

--> Loop [11] - (2)

--> Loop [12] - (2)

--> Loop [13] - (1)

--> Loop [14] - (1)

--> Loop [15] - (1)

--> Loop [16] - (1)

--> Loop [17] - (1)

--> Loop [18] - (0)

Garn Volume = 3.4736 +/- 0.33789 vol-%

___________________________________________________________________

>> STAGE[2] ## AUTO-REFINEMENT - SOLUTION (3/3 - Optimization: 3)

SI(1.0701)AL(0.39522)FE(0.037098)MN(0)MG(0.041531)CA(0.0031998)NA(0.022317)TI(0.01835)K(0.088586)H(1)O(?)O(0) * FG13-47

T = 592.6305 & P = 19088.5935

X-1 = 16.0743

Res = 3.1559e-05

--> Loop [1] - (2)

--> Loop [2] - (2)

--> Loop [3] - (2)

--> Loop [4] - (2)

--> Loop [5] - (2)

--> Loop [6] - (1)

--> Loop [7] - (1)

--> Loop [8] - (0)

Garn Volume = 2.7956 +/- 0.41006 vol-%

################# STAGE 3/4 #################

*** New computation (see details below)

PARAMETERS -------------------------------

Alm Gro Pyr Spe

FIT: 0.681 0.059 0.260 0.000

WEIGHT: 2630 630 700 50

*** OPTIMIZATION 1

INPUT VARIABLES --------------------------------------------------------------------------

1 2 3 4 5 6 7 8 9 10

TC: 600 600 800 800 0 0 0 0 0 0

P: 8000 16000 8000 16000 0 0 0 0 0 0

LIMITS -------------------

MIN MAX

V1: 4.000 16.074

V2: 1.000 2.796

V3: 1.000 99.000

ADJUSTEMENTS ------

VOL (%)

GRT-1: 16.074

GRT-2: 2.796

________________________________________________

>> RUN 1/4 ## OPTIMIZATION 1 ## STAGE[3] ##

TC0 = 600 & P0 = 8000

... OPTIMIZATION COMPLETED (22 s)...

TC = 600 & P = 8000

Volume fraction of GARNET = 0.54416 (in vol-% of the system)

Subsystem volume fraction = 81.1301 (in vol-% of the system)

Density of GARNET/MATRIX = 4.0226/2.7877 (in g/ccm)

Residue = 10000000000000000000

________________________________________________

>> RUN 2/4 ## OPTIMIZATION 1 ## STAGE[3] ##

TC0 = 600 & P0 = 16000

... OPTIMIZATION COMPLETED (120 s)...

SI(1.1682)AL(0.42663)FE(0.030306)MN(0)MG(0.042696)CA(0.00097975)NA(0.024707)TI(0.020308)K(0.098067)H(1)O(?)O(0) * FG13-47

TC = 619.4268 & P = 11010.0781

Composition of GARNET: Alm(0.65198) # Gro(0.077232) # Pyr(0.27079) # Spe(0)

Volume fraction of GARNET = 1.0686 (in vol-% of the system)

Subsystem volume fraction = 81.1301 (in vol-% of the system)

Density of GARNET/MATRIX = 4.0238/2.8114 (in g/ccm)

Residue = 0.035499

--> TEMPORARY SOLUTION (to be used as input for optimization 2)

________________________________________________

>> RUN 3/4 ## OPTIMIZATION 1 ## STAGE[3] ##

TC0 = 800 & P0 = 8000

... OPTIMIZATION COMPLETED (48 s)...

SI(1.1682)AL(0.42663)FE(0.030306)MN(0)MG(0.042696)CA(0.00097975)NA(0.024707)TI(0.020308)K(0.098067)H(1)O(?)O(0) * FG13-47

TC = 839.9219 & P = 7994.1406

Composition of GARNET: Alm(0.63617) # Gro(0.013768) # Pyr(0.35007) # Spe(0)

Volume fraction of GARNET = 1.001 (in vol-% of the system)

Subsystem volume fraction = 81.1301 (in vol-% of the system)

Density of GARNET/MATRIX = 3.9828/2.7393 (in g/ccm)

Residue = 0.11045

--> TEMPORARY SOLUTION (to be used as input for optimization 2)

________________________________________________

>> RUN 4/4 ## OPTIMIZATION 1 ## STAGE[3] ##

TC0 = 800 & P0 = 16000

... OPTIMIZATION COMPLETED (101 s)...

SI(1.1682)AL(0.42663)FE(0.030306)MN(0)MG(0.042696)CA(0.00097975)NA(0.024707)TI(0.020308)K(0.098067)H(1)O(?)O(0) * FG13-47

TC = 599.4087 & P = 18963.2648

Composition of GARNET: Alm(0.68067) # Gro(0.059484) # Pyr(0.25985) # Spe(0)

Volume fraction of GARNET = 1.4178 (in vol-% of the system)

Subsystem volume fraction = 81.1301 (in vol-% of the system)

Density of GARNET/MATRIX = 4.0661/2.8832 (in g/ccm)

Residue = 7.5372e-05

--> TEMPORARY SOLUTION (to be used as input for optimization 2)

...

==> SOLUTION (3) is selected for OPTIMIZATION 2

*** OPTIMIZATION 2

INPUT VARIABLES --------------------------------------------------------------------------

1 2 3 4 5 6 7 8 9 10

TC: 599 599 599 0 0 0 0 0 0 0

P: 18963 18963 18963 0 0 0 0 0 0 0

X1: 16.07 4.00 10.04 0.00 0.00 0.00 0.00 0.00 0.00 0.00

X2: 2.80 1.00 1.90 0.00 0.00 0.00 0.00 0.00 0.00 0.00

LIMITS -------------------

MIN MAX

V1: 4.000 16.074

V2: 1.000 2.796

V3: 1.000 99.000

________________________________________________

>> RUN 1/3 ## OPTIMIZATION 2 ## STAGE[3] ##

TC0 = 599.4087 & P0 = 18963.2648

X0-1 = 16.0743

X0-2 = 2.7956

... OPTIMIZATION COMPLETED (53 s)...

SI(1.1682)AL(0.42663)FE(0.030306)MN(0)MG(0.042696)CA(0.00097975)NA(0.024707)TI(0.020308)K(0.098067)H(1)O(?)O(0) * FG13-47

TC = 599.4087 & P = 18967.8945

X-1 = 16.0743

X-2 = 2.7956

----

Composition of GARNET: Alm(0.68069) # Gro(0.059412) # Pyr(0.2599) # Spe(0)

Volume fraction of GARNET = 1.4196 (in vol-% of the system)

Subsystem volume fraction = 81.1301 (in vol-% of the system)

Density of GARNET/MATRIX = 4.0662/2.8833 (in g/ccm)

Residue = 1.5605e-05

--> SOLUTION (residue is lower than STOL [0.05])

________________________________________________

>> RUN 2/3 ## OPTIMIZATION 2 ## STAGE[3] ##

TC0 = 599.4087 & P0 = 18963.2648

X0-1 = 4

X0-2 = 1

... OPTIMIZATION COMPLETED (231 s)...

SI(1.0441)AL(0.41048)FE(0.091914)MN(0)MG(0.061146)CA(0.0048778)NA(0.020022)TI(0.016497)K(0.079505)H(1)O(?)O(0) * FG13-47

TC = 603.4396 & P = 16235.2343

X-1 = 6.6293

X-2 = 1.0084

----

Composition of GARNET: Alm(0.68734) # Gro(0.052259) # Pyr(0.26041) # Spe(0)

Volume fraction of GARNET = 9.8518 (in vol-% of the system)

Subsystem volume fraction = 92.3623 (in vol-% of the system)

Density of GARNET/MATRIX = 4.0649/2.8693 (in g/ccm)

Residue = 0.0097853

--> SOLUTION (residue is lower than STOL [0.05])

________________________________________________

>> RUN 3/3 ## OPTIMIZATION 2 ## STAGE[3] ##

TC0 = 599.4087 & P0 = 18963.2648

X0-1 = 10.0372

X0-2 = 1.8978

... OPTIMIZATION COMPLETED (140 s)...

SI(1.1138)AL(0.41947)FE(0.056971)MN(0)MG(0.050408)CA(0.003162)NA(0.022659)TI(0.018642)K(0.089954)H(1)O(?)O(0) * FG13-47

TC = 601.0983 & P = 17929.5727

X-1 = 12.8969

X-2 = 1.3604

----

Composition of GARNET: Alm(0.68069) # Gro(0.059427) # Pyr(0.25989) # Spe(0)

Volume fraction of GARNET = 5.0057 (in vol-% of the system)

Subsystem volume fraction = 85.7427 (in vol-% of the system)

Density of GARNET/MATRIX = 4.0636/2.8765 (in g/ccm)

Residue = 5.5221e-06

--> SOLUTION (residue is lower than STOL [0.05])

___________________________________________________________________

>> STAGE[3] ## AUTO-REFINEMENT - SOLUTION (1/3 - Optimization: 1)

SI(1.1682)AL(0.42663)FE(0.030306)MN(0)MG(0.042696)CA(0.00097975)NA(0.024707)TI(0.020308)K(0.098067)H(1)O(?)O(0) * FG13-47

T = 599.4087 & P = 18967.8945

X-1 = 16.0743

X-2 = 2.7956

Res = 1.5605e-05

--> Loop [1] - (2)

--> Loop [2] - (2)

--> Loop [3] - (2)

--> Loop [4] - (2)

--> Loop [5] - (1)

--> Loop [6] - (1)

--> Loop [7] - (1)

--> Loop [8] - (0)

Garn Volume = 1.4196 +/- 0.38169 vol-%

___________________________________________________________________

>> STAGE[3] ## AUTO-REFINEMENT - SOLUTION (2/3 - Optimization: 2)

SI(1.0441)AL(0.41048)FE(0.091914)MN(0)MG(0.061146)CA(0.0048778)NA(0.020022)TI(0.016497)K(0.079505)H(1)O(?)O(0) * FG13-47

T = 603.4396 & P = 16235.2343

X-1 = 6.6293

X-2 = 1.0084

Res = 0.0097853

--> Loop [1] - (4)

--> Loop [2] - (2)

--> Loop [3] - (2)

--> Loop [4] - (2)

--> Loop [5] - (2)

--> Loop [6] - (2)

--> Loop [7] - (2)

--> Loop [8] - (2)

--> Loop [9] - (2)

--> Loop [10] - (2)

--> Loop [11] - (2)

--> Loop [12] - (2)

--> Loop [13] - (2)

--> Loop [14] - (2)

--> Loop [15] - (2)

--> Loop [16] - (2)

--> Loop [17] - (2)

--> Loop [18] - (1)

--> Loop [19] - (1)

--> Loop [20] - (1)

--> Loop [21] - (1)

--> Loop [22] - (1)

--> Loop [23] - (1)

--> Loop [24] - (1)

--> Loop [25] - (1)

--> Loop [26] - (1)

--> Loop [27] - (1)

--> Loop [28] - (1)

--> Loop [29] - (0)

Garn Volume = 9.8518 +/- 1.4243 vol-%

___________________________________________________________________

>> STAGE[3] ## AUTO-REFINEMENT - SOLUTION (3/3 - Optimization: 3)

SI(1.1138)AL(0.41947)FE(0.056971)MN(0)MG(0.050408)CA(0.003162)NA(0.022659)TI(0.018642)K(0.089954)H(1)O(?)O(0) * FG13-47

T = 601.0983 & P = 17929.5727

X-1 = 12.8969

X-2 = 1.3604

Res = 5.5221e-06

--> Loop [1] - (2)

--> Loop [2] - (2)

--> Loop [3] - (2)

--> Loop [4] - (2)

--> Loop [5] - (2)

--> Loop [6] - (2)

--> Loop [7] - (2)

--> Loop [8] - (2)

--> Loop [9] - (1)

--> Loop [10] - (0)

Garn Volume = 5.0057 +/- 1.005 vol-%

################# STAGE 4/4 #################

*** New computation (see details below)

PARAMETERS -------------------------------

Alm Gro Pyr Spe

FIT: 0.700 0.042 0.258 0.000

WEIGHT: 2680 400 700 50

*** OPTIMIZATION 1

INPUT VARIABLES --------------------------------------------------------------------------

1 2 3 4 5 6 7 8 9 10

TC: 600 600 800 800 0 0 0 0 0 0

P: 8000 16000 8000 16000 0 0 0 0 0 0

LIMITS -------------------

MIN MAX

V1: 4.000 12.897

V2: 1.000 1.360

V3: 1.000 5.006

V4: 1.000 99.000

ADJUSTEMENTS ------

VOL (%)

GRT-1: 12.897

GRT-2: 1.360

GRT-3: 5.006

________________________________________________

>> RUN 1/4 ## OPTIMIZATION 1 ## STAGE[4] ##

TC0 = 600 & P0 = 8000

... OPTIMIZATION COMPLETED (19 s)...

TC = 600 & P = 8000

Volume fraction of GARNET = 0.58487 (in vol-% of the system)

Subsystem volume fraction = 80.737 (in vol-% of the system)

Density of GARNET/MATRIX = 4.0279/2.8013 (in g/ccm)

Residue = 10000000000000000000

________________________________________________

>> RUN 2/4 ## OPTIMIZATION 1 ## STAGE[4] ##

TC0 = 600 & P0 = 16000

... OPTIMIZATION COMPLETED (64 s)...

SI(1.2715)AL(0.46684)FE(0.037634)MN(0)MG(0.048238)CA(0.0010956)NA(0.026763)TI(0.022001)K(0.10623)H(1)O(?)O(0) * FG13-47

TC = 598.2604 & P = 19990.3279

Composition of GARNET: Alm(0.69531) # Gro(0.043477) # Pyr(0.26122) # Spe(0)

Volume fraction of GARNET = 1.9832 (in vol-% of the system)

Subsystem volume fraction = 80.737 (in vol-% of the system)

Density of GARNET/MATRIX = 4.0802/2.8913 (in g/ccm)

Residue = 0.0055315

--> TEMPORARY SOLUTION (to be used as input for optimization 2)

________________________________________________

>> RUN 3/4 ## OPTIMIZATION 1 ## STAGE[4] ##

TC0 = 800 & P0 = 8000

... OPTIMIZATION COMPLETED (95 s)...

SI(1.2715)AL(0.46684)FE(0.037634)MN(0)MG(0.048238)CA(0.0010956)NA(0.026763)TI(0.022001)K(0.10623)H(1)O(?)O(0) * FG13-47

TC = 796.6492 & P = 8772.2936

Composition of GARNET: Alm(0.68058) # Gro(0.020115) # Pyr(0.2993) # Spe(0)

Volume fraction of GARNET = 1.0104 (in vol-% of the system)

Subsystem volume fraction = 80.737 (in vol-% of the system)

Density of GARNET/MATRIX = 4.0226/2.7487 (in g/ccm)

Residue = 0.050095

--> TEMPORARY SOLUTION (to be used as input for optimization 2)

________________________________________________

>> RUN 4/4 ## OPTIMIZATION 1 ## STAGE[4] ##

TC0 = 800 & P0 = 16000

... OPTIMIZATION COMPLETED (74 s)...

SI(1.2715)AL(0.46684)FE(0.037634)MN(0)MG(0.048238)CA(0.0010956)NA(0.026763)TI(0.022001)K(0.10623)H(1)O(?)O(0) * FG13-47

TC = 598.2613 & P = 19993.0603

Composition of GARNET: Alm(0.69528) # Gro(0.043435) # Pyr(0.26128) # Spe(0)

Volume fraction of GARNET = 1.9851 (in vol-% of the system)

Subsystem volume fraction = 80.737 (in vol-% of the system)

Density of GARNET/MATRIX = 4.0802/2.8913 (in g/ccm)

Residue = 0.005576

--> TEMPORARY SOLUTION (to be used as input for optimization 2)

...

==> SOLUTION (1) is selected for OPTIMIZATION 2

*** OPTIMIZATION 2

INPUT VARIABLES --------------------------------------------------------------------------

1 2 3 4 5 6 7 8 9 10

TC: 598 598 598 0 0 0 0 0 0 0

P: 19990 19990 19990 0 0 0 0 0 0 0

X1: 12.90 4.00 8.45 0.00 0.00 0.00 0.00 0.00 0.00 0.00

X2: 1.36 1.00 1.18 0.00 0.00 0.00 0.00 0.00 0.00 0.00

X3: 5.01 1.00 3.00 0.00 0.00 0.00 0.00 0.00 0.00 0.00

LIMITS -------------------

MIN MAX

V1: 4.000 12.897

V2: 1.000 1.360

V3: 1.000 5.006

V4: 1.000 99.000

________________________________________________

>> RUN 1/3 ## OPTIMIZATION 2 ## STAGE[4] ##

TC0 = 598.2604 & P0 = 19990.3279

X0-1 = 12.8969

X0-2 = 1.3604

X0-3 = 5.0057

... OPTIMIZATION COMPLETED (45 s)...

SI(1.2715)AL(0.46684)FE(0.037634)MN(0)MG(0.048238)CA(0.0010956)NA(0.026763)TI(0.022001)K(0.10623)H(1)O(?)O(0) * FG13-47

TC = 598.2604 & P = 19996.1844

X-1 = 12.8969

X-2 = 1.3604

X-3 = 5.0057

----

Composition of GARNET: Alm(0.69531) # Gro(0.043397) # Pyr(0.26129) # Spe(0)

Volume fraction of GARNET = 1.9869 (in vol-% of the system)

Subsystem volume fraction = 80.737 (in vol-% of the system)

Density of GARNET/MATRIX = 4.0803/2.8913 (in g/ccm)

Residue = 0.0055477

--> SOLUTION (residue is lower than STOL [0.05])

________________________________________________

>> RUN 2/3 ## OPTIMIZATION 2 ## STAGE[4] ##

TC0 = 598.2604 & P0 = 19990.3279

X0-1 = 4

X0-2 = 1

X0-3 = 1

... OPTIMIZATION COMPLETED (199 s)...

SI(1.0666)AL(0.4217)FE(0.099165)MN(0)MG(0.064623)CA(0.0047333)NA(0.020294)TI(0.016725)K(0.08059)H(1)O(?)O(0) * FG13-47

TC = 598.0707 & P = 19967.2379

X-1 = 4.3784

X-2 = 1.1986

X-3 = 1.2956

----

Composition of GARNET: Alm(0.69978) # Gro(0.0418) # Pyr(0.25842) # Spe(0)

Volume fraction of GARNET = 11.9242 (in vol-% of the system)

Subsystem volume fraction = 93.1275 (in vol-% of the system)

Density of GARNET/MATRIX = 4.0837/2.8939 (in g/ccm)

Residue = 3.8961e-06

--> SOLUTION (residue is lower than STOL [0.05])

________________________________________________

>> RUN 3/3 ## OPTIMIZATION 2 ## STAGE[4] ##

TC0 = 598.2604 & P0 = 19990.3279

X0-1 = 8.4484

X0-2 = 1.1802

X0-3 = 3.0028

... OPTIMIZATION COMPLETED (145 s)...

SI(1.1531)AL(0.44125)FE(0.07426)MN(0)MG(0.058115)CA(0.0032053)NA(0.022993)TI(0.018926)K(0.091286)H(1)O(?)O(0) * FG13-47

TC = 598.0286 & P = 19987.4322

X-1 = 8.13

X-2 = 1.2493

X-3 = 3.1027

----

Composition of GARNET: Alm(0.69978) # Gro(0.041797) # Pyr(0.25842) # Spe(0)

Volume fraction of GARNET = 7.1014 (in vol-% of the system)

Subsystem volume fraction = 87.518 (in vol-% of the system)

Density of GARNET/MATRIX = 4.0837/2.893 (in g/ccm)

Residue = 5.664e-06

--> SOLUTION (residue is lower than STOL [0.05])

___________________________________________________________________

>> STAGE[4] ## AUTO-REFINEMENT - SOLUTION (1/1 - Optimization: 1)

SI(1.2715)AL(0.46684)FE(0.037634)MN(0)MG(0.048238)CA(0.0010956)NA(0.026763)TI(0.022001)K(0.10623)H(1)O(?)O(0) * FG13-47

T = 598.2604 & P = 19996.1844

X-1 = 12.8969

X-2 = 1.3604

X-3 = 5.0057

Res = 0.0055477

--> Loop [1] - (1)

--> Loop [2] - (1)

--> Loop [3] - (1)

--> Loop [4] - (1)

--> Loop [5] - (1)

--> Loop [6] - (1)

--> Loop [7] - (1)

--> Loop [8] - (0)

Garn Volume = 1.9869 +/- 0.26835 vol-%

-----------------------------------

| FINAL RESULTS |

-----------------------------------

-> GARNET RESORPTION (vol-%)

Grt1 Grt2 Grt3 Grt4 Total

Stage 1 0.000 0.000 0.000 0.000 0.000

Stage 2 1.589 0.000 0.000 0.000 1.589

Stage 3 3.177 1.435 0.000 0.000 4.613

Stage 4 0.000 0.000 0.000 0.000 0.000

-> VOLUME OF GARNET (vol-%)

Grt1 Grt2 Grt3 Grt4 Total

Stage 1 17.663 0.000 0.000 0.000 17.663

Stage 2 16.074 2.796 0.000 0.000 18.870

Stage 3 12.897 1.360 5.006 0.000 19.263

Stage 4 12.897 1.360 5.006 1.987 21.250

-> NEWLY GROWN GARNET (vol-%)

Grt1 Grt2 Grt3 Grt4 Total

Stage 1 17.663 0.000 0.000 0.000 17.663

Stage 2 0.000 2.796 0.000 0.000 2.796

Stage 3 0.000 0.000 5.006 0.000 5.006

Stage 4 0.000 0.000 0.000 1.987 1.987

-> ROCK DENSITY (g/ccm)

Density

Stage 1 2.981

Stage 2 3.103

Stage 3 3.102

Stage 4 3.137

## S8.4 FG1249

################# STAGE 1/3 #################

*** New computation (see details below)

PARAMETERS -------------------------------

Alm Gro Pyr Spe

FIT: 0.719 0.049 0.180 0.051

WEIGHT: 200 210 370 170

*** OPTIMIZATION 1

INPUT VARIABLES --------------------------------------------------------------------------

1 2 3 4 5 6 7 8 9 10

TC: 600 600 800 800 0 0 0 0 0 0

P: 8000 16000 8000 16000 0 0 0 0 0 0

LIMITS -------------------

MIN MAX

V1: 4.000 40.000

________________________________________________

>> RUN 1/4 ## OPTIMIZATION 1 ## STAGE[1] ##

TC0 = 600 & P0 = 8000

... OPTIMIZATION COMPLETED (93 s)...

SI(0.97887)AL(0.37015)FE(0.11983)MN(0.0032422)MG(0.068486)CA(0.028531)NA(0.028396)TI(0.013228)K(0.083652)H(1)O(?)O(0) * FG12-49

TC = 725.5422 & P = 5978.289

Composition of GARNET: Alm(0.71673) # Gro(0.060213) # Pyr(0.18581) # Spe(0.037254)

Volume fraction of GARNET = 9.9935 (in vol-% of the system)

Subsystem volume fraction = 100 (in vol-% of the system)

Density of GARNET/MATRIX = 4.0772/2.7606 (in g/ccm)

Residue = 0.018462

--> SOLUTION (residue is lower than STOL [0.04])

________________________________________________

>> RUN 2/4 ## OPTIMIZATION 1 ## STAGE[1] ##

TC0 = 600 & P0 = 16000

... OPTIMIZATION COMPLETED (124 s)...

SI(0.97887)AL(0.37015)FE(0.11983)MN(0.0032422)MG(0.068486)CA(0.028531)NA(0.028396)TI(0.013228)K(0.083652)H(1)O(?)O(0) * FG12-49

TC = 650.4458 & P = 16852.6554

Composition of GARNET: Alm(0.63782) # Gro(0.12914) # Pyr(0.21452) # Spe(0.018519)

Volume fraction of GARNET = 21.3615 (in vol-% of the system)

Subsystem volume fraction = 100 (in vol-% of the system)

Density of GARNET/MATRIX = 4.0347/2.8347 (in g/ccm)

Residue = 0.12341

________________________________________________

>> RUN 3/4 ## OPTIMIZATION 1 ## STAGE[1] ##

TC0 = 800 & P0 = 8000

... OPTIMIZATION COMPLETED (130 s)...

SI(0.97887)AL(0.37015)FE(0.11983)MN(0.0032422)MG(0.068486)CA(0.028531)NA(0.028396)TI(0.013228)K(0.083652)H(1)O(?)O(0) * FG12-49

TC = 717.0163 & P = 5682.2602

Composition of GARNET: Alm(0.72472) # Gro(0.059205) # Pyr(0.17564) # Spe(0.040435)

Volume fraction of GARNET = 9.1899 (in vol-% of the system)

Subsystem volume fraction = 100 (in vol-% of the system)

Density of GARNET/MATRIX = 4.0859/2.7655 (in g/ccm)

Residue = 0.016069

--> SOLUTION (residue is lower than STOL [0.04])

________________________________________________

>> RUN 4/4 ## OPTIMIZATION 1 ## STAGE[1] ##

TC0 = 800 & P0 = 16000

... OPTIMIZATION COMPLETED (161 s)...

SI(0.97887)AL(0.37015)FE(0.11983)MN(0.0032422)MG(0.068486)CA(0.028531)NA(0.028396)TI(0.013228)K(0.083652)H(1)O(?)O(0) * FG12-49

TC = 716.6699 & P = 5669.1746

Composition of GARNET: Alm(0.72505) # Gro(0.059157) # Pyr(0.17521) # Spe(0.04059)

Volume fraction of GARNET = 9.1539 (in vol-% of the system)

Subsystem volume fraction = 100 (in vol-% of the system)

Density of GARNET/MATRIX = 4.0863/2.7658 (in g/ccm)

Residue = 0.016188

--> SOLUTION (residue is lower than STOL [0.04])

___________________________________________________________________

>> STAGE[1] ## AUTO-REFINEMENT - SOLUTION (1/1 - Optimization: 1)

SI(0.97887)AL(0.37015)FE(0.11983)MN(0.0032422)MG(0.068486)CA(0.028531)NA(0.028396)TI(0.013228)K(0.083652)H(1)O(?)O(0) * FG12-49

T = 725.5422 & P = 5978.289

Res = 0.018462

--> Loop [1] - (8)

--> Loop [2] - (8)

--> Loop [3] - (5)

--> Loop [4] - (4)

--> Loop [5] - (4)

--> Loop [6] - (2)

--> Loop [7] - (2)

--> Loop [8] - (2)

--> Loop [9] - (2)

--> Loop [10] - (2)

--> Loop [11] - (2)

--> Loop [12] - (1)

--> Loop [13] - (1)

--> Loop [14] - (0)

Garn Volume = 9.9935 +/- 1.6947 vol-%

################# STAGE 2/3 #################

*** New computation (see details below)

PARAMETERS -------------------------------

Alm Gro Pyr Spe

FIT: 0.756 0.092 0.152 0.000

WEIGHT: 200 500 340 22

*** OPTIMIZATION 1

INPUT VARIABLES --------------------------------------------------------------------------

1 2 3 4 5 6 7 8 9 10

TC: 600 600 800 800 0 0 0 0 0 0

P: 8000 16000 8000 16000 0 0 0 0 0 0

LIMITS -------------------

MIN MAX

V1: 8.000 9.990

V2: 2.000 99.000

ADJUSTEMENTS ------

VOL (%)

GRT-1: 9.990

________________________________________________

>> RUN 1/4 ## OPTIMIZATION 1 ## STAGE[2] ##

TC0 = 600 & P0 = 8000

... OPTIMIZATION COMPLETED (82 s)...

SI(1.0386)AL(0.36384)FE(0.064051)MN(0)MG(0.060799)CA(0.028034)NA(0.032787)TI(0.015291)K(0.09733)H(1)O(?)O(0) * FG12-49

TC = 618.5989 & P = 6606.1645

Composition of GARNET: Alm(0.71506) # Gro(0.11509) # Pyr(0.16984) # Spe(0)

Volume fraction of GARNET = 3.7196 (in vol-% of the system)

Subsystem volume fraction = 90.01 (in vol-% of the system)

Density of GARNET/MATRIX = 4.0599/2.7652 (in g/ccm)

Residue = 0.049762

--> TEMPORARY SOLUTION (to be used as input for optimization 2)

________________________________________________

>> RUN 2/4 ## OPTIMIZATION 1 ## STAGE[2] ##

TC0 = 600 & P0 = 16000

... OPTIMIZATION COMPLETED (69 s)...

SI(1.0386)AL(0.36384)FE(0.064051)MN(0)MG(0.060799)CA(0.028034)NA(0.032787)TI(0.015291)K(0.09733)H(1)O(?)O(0) * FG12-49

TC = 543.8563 & P = 15239.9585

Composition of GARNET: Alm(0.66794) # Gro(0.21348) # Pyr(0.11858) # Spe(0)

Volume fraction of GARNET = 8.3889 (in vol-% of the system)

Subsystem volume fraction = 90.01 (in vol-% of the system)

Density of GARNET/MATRIX = 4.0492/2.8351 (in g/ccm)

Residue = 0.15309

--> TEMPORARY SOLUTION (to be used as input for optimization 2)

________________________________________________

>> RUN 3/4 ## OPTIMIZATION 1 ## STAGE[2] ##

TC0 = 800 & P0 = 8000

... OPTIMIZATION COMPLETED (75 s)...

SI(1.0386)AL(0.36384)FE(0.064051)MN(0)MG(0.060799)CA(0.028034)NA(0.032787)TI(0.015291)K(0.09733)H(1)O(?)O(0) * FG12-49

TC = 618.9824 & P = 6607.3634

Composition of GARNET: Alm(0.71508) # Gro(0.1148) # Pyr(0.17012) # Spe(0)

Volume fraction of GARNET = 3.7458 (in vol-% of the system)

Subsystem volume fraction = 90.01 (in vol-% of the system)

Density of GARNET/MATRIX = 4.0599/2.7649 (in g/ccm)

Residue = 0.04972

--> TEMPORARY SOLUTION (to be used as input for optimization 2)

________________________________________________

>> RUN 4/4 ## OPTIMIZATION 1 ## STAGE[2] ##

TC0 = 800 & P0 = 16000

... OPTIMIZATION COMPLETED (146 s)...

SI(1.0386)AL(0.36384)FE(0.064051)MN(0)MG(0.060799)CA(0.028034)NA(0.032787)TI(0.015291)K(0.09733)H(1)O(?)O(0) * FG12-49

TC = 666.8118 & P = 6605.5321

Composition of GARNET: Alm(0.71182) # Gro(0.083985) # Pyr(0.20419) # Spe(0)

Volume fraction of GARNET = 2.6922 (in vol-% of the system)

Subsystem volume fraction = 90.01 (in vol-% of the system)

Density of GARNET/MATRIX = 4.0534/2.767 (in g/ccm)

Residue = 0.068717

--> TEMPORARY SOLUTION (to be used as input for optimization 2)

...

==> SOLUTION (3) is selected for OPTIMIZATION 2

*** OPTIMIZATION 2

INPUT VARIABLES --------------------------------------------------------------------------

1 2 3 4 5 6 7 8 9 10

TC: 619 619 619 0 0 0 0 0 0 0

P: 6607 6607 6607 0 0 0 0 0 0 0

X1: 9.99 8.00 9.00 0.00 0.00 0.00 0.00 0.00 0.00 0.00

LIMITS -------------------

MIN MAX

V1: 8.000 9.990

V2: 2.000 99.000

________________________________________________

>> RUN 1/3 ## OPTIMIZATION 2 ## STAGE[2] ##

TC0 = 618.9824 & P0 = 6607.3634

X0-1 = 9.99

... OPTIMIZATION COMPLETED (82 s)...

SI(1.0384)AL(0.36387)FE(0.064262)MN(0)MG(0.060828)CA(0.028036)NA(0.03277)TI(0.015283)K(0.097278)H(1)O(?)O(0) * FG12-49

TC = 619.6975 & P = 6608.7438

X-1 = 9.956

----

Composition of GARNET: Alm(0.71513) # Gro(0.11425) # Pyr(0.17062) # Spe(0)

Volume fraction of GARNET = 3.778 (in vol-% of the system)

Subsystem volume fraction = 90.044 (in vol-% of the system)

Density of GARNET/MATRIX = 4.0599/2.7649 (in g/ccm)

Residue = 0.049615

________________________________________________

>> RUN 2/3 ## OPTIMIZATION 2 ## STAGE[2] ##

TC0 = 618.9824 & P0 = 6607.3634

X0-1 = 8

... OPTIMIZATION COMPLETED (88 s)...

SI(1.0257)AL(0.36521)FE(0.076111)MN(0)MG(0.062461)CA(0.028141)NA(0.031837)TI(0.014845)K(0.094372)H(1)O(?)O(0) * FG12-49

TC = 615.5286 & P = 6116.326

X-1 = 8.003

----

Composition of GARNET: Alm(0.73657) # Gro(0.10603) # Pyr(0.1574) # Spe(0)

Volume fraction of GARNET = 2.0024 (in vol-% of the system)

Subsystem volume fraction = 91.997 (in vol-% of the system)

Density of GARNET/MATRIX = 4.0757/2.7971 (in g/ccm)

Residue = 0.024006

--> SOLUTION (residue is lower than STOL [0.04])

________________________________________________

>> RUN 3/3 ## OPTIMIZATION 2 ## STAGE[2] ##

TC0 = 618.9824 & P0 = 6607.3634

X0-1 = 8.995

... OPTIMIZATION COMPLETED (94 s)...

SI(1.026)AL(0.36517)FE(0.075797)MN(0)MG(0.062417)CA(0.028138)NA(0.031862)TI(0.014857)K(0.09445)H(1)O(?)O(0) * FG12-49

TC = 618.3961 & P = 6620.7806

X-1 = 8.0559

----

Composition of GARNET: Alm(0.71547) # Gro(0.11448) # Pyr(0.17005) # Spe(0)

Volume fraction of GARNET = 5.676 (in vol-% of the system)

Subsystem volume fraction = 91.9441 (in vol-% of the system)

Density of GARNET/MATRIX = 4.0603/2.7665 (in g/ccm)

Residue = 0.049234

___________________________________________________________________

>> STAGE[2] ## AUTO-REFINEMENT - SOLUTION (1/1 - Optimization: 1)

SI(1.0257)AL(0.36521)FE(0.076111)MN(0)MG(0.062461)CA(0.028141)NA(0.031837)TI(0.014845)K(0.094372)H(1)O(?)O(0) * FG12-49

T = 615.5286 & P = 6116.326

X-1 = 8.003

Res = 0.024006

--> Loop [1] - (8)

--> Loop [2] - (7)

--> Loop [3] - (5)

--> Loop [4] - (5)

--> Loop [5] - (4)

--> Loop [6] - (4)

--> Loop [7] - (2)

--> Loop [8] - (0)

Garn Volume = 2.0024 +/- 1.3661 vol-%

################# STAGE 3/3 #################

*** New computation (see details below)

PARAMETERS -------------------------------

Alm Gro Pyr Spe

FIT: 0.624 0.176 0.200 0.000

WEIGHT: 160 1400 420 35

==> GO FAST MODE (OPTI = 2 # OPTP: 650 - 16000)

*** OPTIMIZATION 2

INPUT VARIABLES --------------------------------------------------------------------------

1 2 3 4 5 6 7 8 9 10

TC: 650 0 0 0 0 0 0 0 0 0

P: 16000 0 0 0 0 0 0 0 0 0

X1: 7.50 0.00 0.00 0.00 0.00 0.00 0.00 0.00 0.00 0.00

X2: 1.95 0.00 0.00 0.00 0.00 0.00 0.00 0.00 0.00 0.00

LIMITS -------------------

MIN MAX

V1: 7.000 8.000

V2: 1.900 2.000

V3: 1.000 99.000

________________________________________________

>> RUN 1/1 ## OPTIMIZATION 2 ## STAGE[3] ##

TC0 = 650 & P0 = 16000

X0-1 = 7.5

X0-2 = 1.95

... OPTIMIZATION COMPLETED (94 s)...

SI(1.0832)AL(0.38097)FE(0.070374)MN(0)MG(0.064734)CA(0.0286)NA(0.034019)TI(0.015824)K(0.10094)H(1)O(?)O(0) * FG12-49

TC = 614.2473 & P = 16347.149

X-1 = 7.7974

X-2 = 1.9558

----

Composition of GARNET: Alm(0.62385) # Gro(0.17604) # Pyr(0.20011) # Spe(0)

Volume fraction of GARNET = 9.9493 (in vol-% of the system)

Subsystem volume fraction = 90.2468 (in vol-% of the system)

Density of GARNET/MATRIX = 4.0121/2.835 (in g/ccm)

Residue = 3.379e-05

--> SOLUTION (residue is lower than STOL [0.04])

___________________________________________________________________

>> STAGE[3] ## AUTO-REFINEMENT - SOLUTION (1/1 - Optimization: 1)

SI(1.0832)AL(0.38097)FE(0.070374)MN(0)MG(0.064734)CA(0.0286)NA(0.034019)TI(0.015824)K(0.10094)H(1)O(?)O(0) * FG12-49

T = 614.2473 & P = 16347.149

X-1 = 7.7974

X-2 = 1.9558

Res = 3.379e-05

--> Loop [1] - (8)

--> Loop [2] - (6)

--> Loop [3] - (4)

--> Loop [4] - (1)

--> Loop [5] - (0)

Garn Volume = 9.9493 +/- 0.2293 vol-%

################# STAGE 4/4 #################

*** New computation (see details below)

PARAMETERS -------------------------------

Alm Gro Pyr Spe

FIT: 0.583 0.231 0.186 0.000

WEIGHT: 160 1400 420 35

*** OPTIMIZATION 1

INPUT VARIABLES --------------------------------------------------------------------------

1 2 3 4 5 6 7 8 9 10

TC: 600 600 800 800 0 0 0 0 0 0

P: 8000 16000 8000 16000 0 0 0 0 0 0

LIMITS -------------------

MIN MAX

V1: 7.780 7.790

V2: 1.850 1.900

V3: 3.000 9.000

V4: 1.000 99.000

ADJUSTEMENTS ------

VOL (%)

GRT-1: 7.790

GRT-2: 1.900

GRT-3: 9.000

________________________________________________

>> RUN 1/4 ## OPTIMIZATION 1 ## STAGE[4] ##

TC0 = 600 & P0 = 8000

... OPTIMIZATION COMPLETED (109 s)...

SI(1.2916)AL(0.42932)FE(0.038446)MN(0)MG(0.065287)CA(0.02088)NA(0.042853)TI(0.019578)K(0.12788)H(1)O(?)O(0) * FG12-49

TC = 657.3779 & P = 11272.8762

Composition of GARNET: Alm(0.59069) # Gro(0.18782) # Pyr(0.22149) # Spe(0)

Volume fraction of GARNET = 2.8709 (in vol-% of the system)

Subsystem volume fraction = 81.31 (in vol-% of the system)

Density of GARNET/MATRIX = 3.971/2.7711 (in g/ccm)

Residue = 0.056101

--> TEMPORARY SOLUTION (to be used as input for optimization 2)

________________________________________________

>> RUN 2/4 ## OPTIMIZATION 1 ## STAGE[4] ##

TC0 = 600 & P0 = 16000

... OPTIMIZATION COMPLETED (73 s)...

SI(1.2916)AL(0.42932)FE(0.038446)MN(0)MG(0.065287)CA(0.02088)NA(0.042853)TI(0.019578)K(0.12788)H(1)O(?)O(0) * FG12-49

TC = 661.6837 & P = 15604.4678

Composition of GARNET: Alm(0.58713) # Gro(0.1922) # Pyr(0.22067) # Spe(0)

Volume fraction of GARNET = 4.0509 (in vol-% of the system)

Subsystem volume fraction = 81.31 (in vol-% of the system)

Density of GARNET/MATRIX = 3.9774/2.8017 (in g/ccm)

Residue = 0.05187

--> TEMPORARY SOLUTION (to be used as input for optimization 2)

________________________________________________

>> RUN 3/4 ## OPTIMIZATION 1 ## STAGE[4] ##

TC0 = 800 & P0 = 8000

... OPTIMIZATION COMPLETED (9 s)...

TC = 800 & P = 8000

Volume fraction of GARNET = 0 (in vol-% of the system)

Subsystem volume fraction = 81.31 (in vol-% of the system)

Density of GARNET/MATRIX = 0/2.7168 (in g/ccm)

Residue = 10000000000000000000

________________________________________________

>> RUN 4/4 ## OPTIMIZATION 1 ## STAGE[4] ##

TC0 = 800 & P0 = 16000

... OPTIMIZATION COMPLETED (124 s)...

SI(1.2916)AL(0.42932)FE(0.038446)MN(0)MG(0.065287)CA(0.02088)NA(0.042853)TI(0.019578)K(0.12788)H(1)O(?)O(0) * FG12-49

TC = 657.4094 & P = 11291.7221

Composition of GARNET: Alm(0.59072) # Gro(0.18784) # Pyr(0.22145) # Spe(0)

Volume fraction of GARNET = 2.8782 (in vol-% of the system)

Subsystem volume fraction = 81.31 (in vol-% of the system)

Density of GARNET/MATRIX = 3.971/2.7713 (in g/ccm)

Residue = 0.056067

--> TEMPORARY SOLUTION (to be used as input for optimization 2)

...

==> SOLUTION (2) is selected for OPTIMIZATION 2

*** OPTIMIZATION 2

INPUT VARIABLES --------------------------------------------------------------------------

1 2 3 4 5 6 7 8 9 10

TC: 662 662 662 0 0 0 0 0 0 0

P: 15604 15604 15604 0 0 0 0 0 0 0

X1: 7.79 7.78 7.79 0.00 0.00 0.00 0.00 0.00 0.00 0.00

X2: 1.90 1.85 1.88 0.00 0.00 0.00 0.00 0.00 0.00 0.00

X3: 9.00 3.00 6.00 0.00 0.00 0.00 0.00 0.00 0.00 0.00

LIMITS -------------------

MIN MAX

V1: 7.780 7.790

V2: 1.850 1.900

V3: 3.000 9.000

V4: 1.000 99.000

________________________________________________

>> RUN 1/3 ## OPTIMIZATION 2 ## STAGE[4] ##

TC0 = 661.6837 & P0 = 15604.4678

X0-1 = 7.79

X0-2 = 1.9

X0-3 = 9

... OPTIMIZATION COMPLETED (65 s)...

SI(1.2916)AL(0.42932)FE(0.038446)MN(0)MG(0.065287)CA(0.02088)NA(0.042853)TI(0.019578)K(0.12788)H(1)O(?)O(0) * FG12-49

TC = 661.6837 & P = 15607.325

X-1 = 7.79

X-2 = 1.9

X-3 = 9

----

Composition of GARNET: Alm(0.58712) # Gro(0.19228) # Pyr(0.2206) # Spe(0)

Volume fraction of GARNET = 4.0509 (in vol-% of the system)

Subsystem volume fraction = 81.31 (in vol-% of the system)

Density of GARNET/MATRIX = 3.9773/2.8017 (in g/ccm)

Residue = 0.051761

--> SOLUTION (residue is lower than STOL [0.07])

________________________________________________

>> RUN 2/3 ## OPTIMIZATION 2 ## STAGE[4] ##

TC0 = 661.6837 & P0 = 15604.4678

X0-1 = 7.78

X0-2 = 1.85

X0-3 = 3

... OPTIMIZATION COMPLETED (77 s)...

SI(1.1775)AL(0.40651)FE(0.06276)MN(0)MG(0.066689)CA(0.026901)NA(0.037678)TI(0.017413)K(0.11202)H(1)O(?)O(0) * FG12-49

TC = 661.501 & P = 15620.4004

X-1 = 7.7833

X-2 = 1.8951

X-3 = 3.0741

----

Composition of GARNET: Alm(0.5881) # Gro(0.19039) # Pyr(0.22151) # Spe(0)

Volume fraction of GARNET = 8.5979 (in vol-% of the system)

Subsystem volume fraction = 87.2476 (in vol-% of the system)

Density of GARNET/MATRIX = 3.9782/2.8004 (in g/ccm)

Residue = 0.053863

--> SOLUTION (residue is lower than STOL [0.07])

________________________________________________

>> RUN 3/3 ## OPTIMIZATION 2 ## STAGE[4] ##

TC0 = 661.6837 & P0 = 15604.4678

X0-1 = 7.785

X0-2 = 1.875

X0-3 = 6

... OPTIMIZATION COMPLETED (47 s)...

SI(1.2357)AL(0.41807)FE(0.050172)MN(0)MG(0.065929)CA(0.023778)NA(0.04033)TI(0.018521)K(0.12015)H(1)O(?)O(0) * FG12-49

TC = 661.6837 & P = 15616.6588

X-1 = 7.785

X-2 = 1.897

X-3 = 6.225

----

Composition of GARNET: Alm(0.58752) # Gro(0.19122) # Pyr(0.22126) # Spe(0)

Volume fraction of GARNET = 6.0882 (in vol-% of the system)

Subsystem volume fraction = 84.093 (in vol-% of the system)

Density of GARNET/MATRIX = 3.9777/2.8011 (in g/ccm)

Residue = 0.053027

--> SOLUTION (residue is lower than STOL [0.07])

___________________________________________________________________

>> STAGE[4] ## AUTO-REFINEMENT - SOLUTION (1/2 - Optimization: 1)

SI(1.2916)AL(0.42932)FE(0.038446)MN(0)MG(0.065287)CA(0.02088)NA(0.042853)TI(0.019578)K(0.12788)H(1)O(?)O(0) * FG12-49

T = 661.6837 & P = 15607.325

X-1 = 7.79

X-2 = 1.9

X-3 = 9

Res = 0.051761

--> Loop [1] - (6)

--> Loop [2] - (4)

--> Loop [3] - (2)

--> Loop [4] - (2)

--> Loop [5] - (2)

--> Loop [6] - (2)

--> Loop [7] - (2)

--> Loop [8] - (2)

--> Loop [9] - (2)

--> Loop [10] - (2)

--> Loop [11] - (2)

--> Loop [12] - (1)

--> Loop [13] - (0)

Garn Volume = 4.0509 +/- 1.1851 vol-%

___________________________________________________________________

>> STAGE[4] ## AUTO-REFINEMENT - SOLUTION (2/2 - Optimization: 2)

SI(1.1775)AL(0.40651)FE(0.06276)MN(0)MG(0.066689)CA(0.026901)NA(0.037678)TI(0.017413)K(0.11202)H(1)O(?)O(0) * FG12-49

T = 661.501 & P = 15620.4004

X-1 = 7.7833

X-2 = 1.8951

X-3 = 3.0741

Res = 0.053863

--> Loop [1] - (7)

--> Loop [2] - (4)

--> Loop [3] - (3)

--> Loop [4] - (3)

--> Loop [5] - (2)

--> Loop [6] - (2)

--> Loop [7] - (2)

--> Loop [8] - (2)

--> Loop [9] - (2)

--> Loop [10] - (2)

--> Loop [11] - (2)

--> Loop [12] - (1)

--> Loop [13] - (0)

Garn Volume = 8.5979 +/- 1.5682 vol-%

-----------------------------------

| FINAL RESULTS |

-----------------------------------

-> GARNET RESORPTION (vol-%)

Grt1 Grt2 Grt3 Grt4 Total

Stage 1 0.000 0.000 0.000 0.000 0.000

Stage 2 1.990 0.000 0.000 0.000 1.990

Stage 3 0.206 0.047 0.000 0.000 0.252

Stage 4 0.014 0.061 6.875 0.000 6.950

-> VOLUME OF GARNET (vol-%)

Grt1 Grt2 Grt3 Grt4 Total

Stage 1 9.993 0.000 0.000 0.000 9.993

Stage 2 8.003 2.002 0.000 0.000 10.005

Stage 3 7.797 1.956 9.949 0.000 19.703

Stage 4 7.783 1.895 3.074 8.598 21.350

-> NEWLY GROWN GARNET (vol-%)

Grt1 Grt2 Grt3 Grt4 Total

Stage 1 9.993 0.000 0.000 0.000 9.993

Stage 2 0.000 2.002 0.000 0.000 2.002

Stage 3 0.000 0.000 9.949 0.000 9.949

Stage 4 0.000 0.000 0.000 8.598 8.598

-> ROCK DENSITY (g/ccm)

Density

Stage 1 2.892

Stage 2 2.925

Stage 3 3.073

Stage 4 3.062

## S8.5 FG1420

################# STAGE 1/4 #################

*** New computation (see details below)

PARAMETERS -------------------------------

Alm Gro Pyr Spe

FIT: 0.539 0.358 0.023 0.080

WEIGHT: 1380 1850 70 230

*** OPTIMIZATION 1

INPUT VARIABLES --------------------------------------------------------------------------

1 2 3 4 5 6 7 8 9 10

TC: 525 525 775 775 0 0 0 0 0 0

P: 8000 16000 8000 16000 0 0 0 0 0 0

LIMITS -------------------

MIN MAX

V1: 0.000 40.000

________________________________________________

>> RUN 1/4 ## OPTIMIZATION 1 ## STAGE[1] ##

TC0 = 525 & P0 = 8000

... OPTIMIZATION COMPLETED (155 s)...

SI(1.0058)AL(0.37348)FE(0.076688)MN(0.0015506)MG(0.052854)CA(0.037447)NA(0.055824)TI(0.0091182)K(0.097665)H(1)O(?)O(0) * FG14-20

TC = 486.1073 & P = 5795.2668

Composition of GARNET: Alm(0.52405) # Gro(0.34499) # Pyr(0.034969) # Spe(0.095996)

Volume fraction of GARNET = 1.8272 (in vol-% of the system)

Subsystem volume fraction = 100 (in vol-% of the system)

Density of GARNET/MATRIX = 3.994/2.784 (in g/ccm)

Residue = 0.028182

--> SOLUTION (residue is lower than STOL [0.05])

________________________________________________

>> RUN 2/4 ## OPTIMIZATION 1 ## STAGE[1] ##

TC0 = 525 & P0 = 16000

... OPTIMIZATION COMPLETED (106 s)...

SI(1.0058)AL(0.37348)FE(0.076688)MN(0.0015506)MG(0.052854)CA(0.037447)NA(0.055824)TI(0.0091182)K(0.097665)H(1)O(?)O(0) * FG14-20

TC = 454.6997 & P = 16133.2122

Composition of GARNET: Alm(0.62229) # Gro(0.24582) # Pyr(0.035216) # Spe(0.096672)

Volume fraction of GARNET = 1.8653 (in vol-% of the system)

Subsystem volume fraction = 100 (in vol-% of the system)

Density of GARNET/MATRIX = 4.0965/2.9281 (in g/ccm)

Residue = 0.14168

________________________________________________

>> RUN 3/4 ## OPTIMIZATION 1 ## STAGE[1] ##

TC0 = 775 & P0 = 8000

... OPTIMIZATION COMPLETED (120 s)...

SI(1.0058)AL(0.37348)FE(0.076688)MN(0.0015506)MG(0.052854)CA(0.037447)NA(0.055824)TI(0.0091182)K(0.097665)H(1)O(?)O(0) * FG14-20

TC = 487.618 & P = 9648.7371

Composition of GARNET: Alm(0.58686) # Gro(0.2778) # Pyr(0.035808) # Spe(0.099532)

Volume fraction of GARNET = 1.8007 (in vol-% of the system)

Subsystem volume fraction = 100 (in vol-% of the system)

Density of GARNET/MATRIX = 4.0531/2.8743 (in g/ccm)

Residue = 0.096699

________________________________________________

>> RUN 4/4 ## OPTIMIZATION 1 ## STAGE[1] ##

TC0 = 775 & P0 = 16000

... OPTIMIZATION COMPLETED (139 s)...

SI(1.0058)AL(0.37348)FE(0.076688)MN(0.0015506)MG(0.052854)CA(0.037447)NA(0.055824)TI(0.0091182)K(0.097665)H(1)O(?)O(0) * FG14-20

TC = 455.4224 & P = 16136.7471

Composition of GARNET: Alm(0.62493) # Gro(0.24655) # Pyr(0.035547) # Spe(0.092974)

Volume fraction of GARNET = 1.9402 (in vol-% of the system)

Subsystem volume fraction = 100 (in vol-% of the system)

Density of GARNET/MATRIX = 4.0957/2.9276 (in g/ccm)

Residue = 0.14232

___________________________________________________________________

>> STAGE[1] ## AUTO-REFINEMENT - SOLUTION (1/1 - Optimization: 1)

SI(1.0058)AL(0.37348)FE(0.076688)MN(0.0015506)MG(0.052854)CA(0.037447)NA(0.055824)TI(0.0091182)K(0.097665)H(1)O(?)O(0) * FG14-20

T = 486.1073 & P = 5795.2668

Res = 0.028182

--> Loop [1] - (4)

--> Loop [2] - (1)

--> Loop [3] - (1)

--> Loop [4] - (1)

--> Loop [5] - (1)

--> Loop [6] - (0)

Garn Volume = 1.8272 +/- 0.26128 vol-%

################# STAGE 2/4 #################

*** New computation (see details below)

PARAMETERS -------------------------------

Alm Gro Pyr Spe

FIT: 0.567 0.365 0.025 0.043

WEIGHT: 1450 1850 75 90

*** OPTIMIZATION 1

INPUT VARIABLES --------------------------------------------------------------------------

1 2 3 4 5 6 7 8 9 10

TC: 525 525 775 775 0 0 0 0 0 0

P: 8000 16000 8000 16000 0 0 0 0 0 0

LIMITS -------------------

MIN MAX

V1: 1.790 1.827

V2: 1.000 99.000

ADJUSTEMENTS ------

VOL (%)

GRT-1: 1.827

________________________________________________

>> RUN 1/4 ## OPTIMIZATION 1 ## STAGE[2] ##

TC0 = 525 & P0 = 8000

... OPTIMIZATION COMPLETED (249 s)...

SI(1.0157)AL(0.37243)FE(0.069824)MN(0.00026715)MG(0.053887)CA(0.032519)NA(0.057315)TI(0.0093288)K(0.10027)H(1)O(?)O(0) * FG14-20

TC = 503.4339 & P = 6692.8139

Composition of GARNET: Alm(0.59254) # Gro(0.33451) # Pyr(0.043483) # Spe(0.029467)

Volume fraction of GARNET = 1.0026 (in vol-% of the system)

Subsystem volume fraction = 98.1728 (in vol-% of the system)

Density of GARNET/MATRIX = 3.9966/2.7847 (in g/ccm)

Residue = 0.045691

--> TEMPORARY SOLUTION (to be used as input for optimization 2)

________________________________________________

>> RUN 2/4 ## OPTIMIZATION 1 ## STAGE[2] ##

TC0 = 525 & P0 = 16000

... OPTIMIZATION COMPLETED (129 s)...

SI(1.0157)AL(0.37243)FE(0.069824)MN(0.00026715)MG(0.053887)CA(0.032519)NA(0.057315)TI(0.0093288)K(0.10027)H(1)O(?)O(0) * FG14-20

TC = 468.6608 & P = 16481.0852

Composition of GARNET: Alm(0.68895) # Gro(0.23899) # Pyr(0.041902) # Spe(0.030156)

Volume fraction of GARNET = 1.0069 (in vol-% of the system)

Subsystem volume fraction = 98.1728 (in vol-% of the system)

Density of GARNET/MATRIX = 4.0971/2.9229 (in g/ccm)

Residue = 0.17629

--> TEMPORARY SOLUTION (to be used as input for optimization 2)

________________________________________________

>> RUN 3/4 ## OPTIMIZATION 1 ## STAGE[2] ##

TC0 = 775 & P0 = 8000

... OPTIMIZATION COMPLETED (331 s)...

SI(1.0157)AL(0.37243)FE(0.069824)MN(0.00026715)MG(0.053887)CA(0.032519)NA(0.057315)TI(0.0093288)K(0.10027)H(1)O(?)O(0) * FG14-20

TC = 504.2653 & P = 8569.1904

Composition of GARNET: Alm(0.62649) # Gro(0.30029) # Pyr(0.043283) # Spe(0.029939)

Volume fraction of GARNET = 1.0041 (in vol-% of the system)

Subsystem volume fraction = 98.1728 (in vol-% of the system)

Density of GARNET/MATRIX = 4.027/2.8475 (in g/ccm)

Residue = 0.090409

--> TEMPORARY SOLUTION (to be used as input for optimization 2)

________________________________________________

>> RUN 4/4 ## OPTIMIZATION 1 ## STAGE[2] ##

TC0 = 775 & P0 = 16000

... OPTIMIZATION COMPLETED (203 s)...

SI(1.0157)AL(0.37243)FE(0.069824)MN(0.00026715)MG(0.053887)CA(0.032519)NA(0.057315)TI(0.0093288)K(0.10027)H(1)O(?)O(0) * FG14-20

TC = 466.1509 & P = 16639.1912

Composition of GARNET: Alm(0.68563) # Gro(0.24334) # Pyr(0.041262) # Spe(0.029776)

Volume fraction of GARNET = 1.0203 (in vol-% of the system)

Subsystem volume fraction = 98.1728 (in vol-% of the system)

Density of GARNET/MATRIX = 4.0949/2.9238 (in g/ccm)

Residue = 0.17086

--> TEMPORARY SOLUTION (to be used as input for optimization 2)

...

==> SOLUTION (1) is selected for OPTIMIZATION 2

*** OPTIMIZATION 2

INPUT VARIABLES --------------------------------------------------------------------------

1 2 3 4 5 6 7 8 9 10

TC: 503 503 503 0 0 0 0 0 0 0

P: 6693 6693 6693 0 0 0 0 0 0 0

X1: 1.83 1.79 1.81 0.00 0.00 0.00 0.00 0.00 0.00 0.00

LIMITS -------------------

MIN MAX

V1: 1.790 1.827

V2: 1.000 99.000

________________________________________________

>> RUN 1/3 ## OPTIMIZATION 2 ## STAGE[2] ##

TC0 = 503.4339 & P0 = 6692.8139

X0-1 = 1.8272

... OPTIMIZATION COMPLETED (155 s)...

SI(1.0155)AL(0.37245)FE(0.069965)MN(0.00029352)MG(0.053866)CA(0.03262)NA(0.057284)TI(0.0093244)K(0.10022)H(1)O(?)O(0) * FG14-20

TC = 502.9372 & P = 6662.0478

X-1 = 1.7903

----

Composition of GARNET: Alm(0.59037) # Gro(0.33432) # Pyr(0.043222) # Spe(0.032089)

Volume fraction of GARNET = 1.0141 (in vol-% of the system)

Subsystem volume fraction = 98.2097 (in vol-% of the system)

Density of GARNET/MATRIX = 3.9969/2.7846 (in g/ccm)

Residue = 0.043801

--> SOLUTION (residue is lower than STOL [0.05])

________________________________________________

>> RUN 2/3 ## OPTIMIZATION 2 ## STAGE[2] ##

TC0 = 503.4339 & P0 = 6692.8139

X0-1 = 1.79

... OPTIMIZATION COMPLETED (166 s)...

SI(1.0155)AL(0.37245)FE(0.069959)MN(0.0002925)MG(0.053867)CA(0.032616)NA(0.057286)TI(0.0093246)K(0.10022)H(1)O(?)O(0) * FG14-20

TC = 502.7765 & P = 6655.1159

X-1 = 1.7917

----

Composition of GARNET: Alm(0.5898) # Gro(0.33462) # Pyr(0.043156) # Spe(0.032422)

Volume fraction of GARNET = 1.0002 (in vol-% of the system)

Subsystem volume fraction = 98.2083 (in vol-% of the system)

Density of GARNET/MATRIX = 3.9967/2.7846 (in g/ccm)

Residue = 0.04317

--> SOLUTION (residue is lower than STOL [0.05])

________________________________________________

>> RUN 3/3 ## OPTIMIZATION 2 ## STAGE[2] ##

TC0 = 503.4339 & P0 = 6692.8139

X0-1 = 1.8086

... OPTIMIZATION COMPLETED (180 s)...

SI(1.0156)AL(0.37244)FE(0.069895)MN(0.0002805)MG(0.053876)CA(0.03257)NA(0.057299)TI(0.0093266)K(0.10025)H(1)O(?)O(0) * FG14-20

TC = 503.0945 & P = 6681.4242

X-1 = 1.8085

----

Composition of GARNET: Alm(0.59107) # Gro(0.33459) # Pyr(0.043301) # Spe(0.031039)

Volume fraction of GARNET = 1.002 (in vol-% of the system)

Subsystem volume fraction = 98.1915 (in vol-% of the system)

Density of GARNET/MATRIX = 3.9967/2.7848 (in g/ccm)

Residue = 0.044306

--> SOLUTION (residue is lower than STOL [0.05])

___________________________________________________________________

>> STAGE[2] ## AUTO-REFINEMENT - SOLUTION (1/1 - Optimization: 1)

SI(1.0155)AL(0.37245)FE(0.069965)MN(0.00029352)MG(0.053866)CA(0.03262)NA(0.057284)TI(0.0093244)K(0.10022)H(1)O(?)O(0) * FG14-20

T = 502.9372 & P = 6662.0478

X-1 = 1.7903

Res = 0.043801

--> Loop [1] - (5)

--> Loop [2] - (3)

--> Loop [3] - (1)

--> Loop [4] - (1)

--> Loop [5] - (1)

--> Loop [6] - (1)

--> Loop [7] - (1)

--> Loop [8] - (1)

--> Loop [9] - (1)

--> Loop [10] - (0)

################# STAGE 3/4 #################

*** New computation (see details below)

PARAMETERS -------------------------------

Alm Gro Pyr Spe

FIT: 0.600 0.354 0.029 0.017

WEIGHT: 1550 1850 90 50

*** OPTIMIZATION 1

INPUT VARIABLES --------------------------------------------------------------------------

1 2 3 4 5 6 7 8 9 10

TC: 525 525 775 775 0 0 0 0 0 0

P: 8000 16000 8000 16000 0 0 0 0 0 0

LIMITS -------------------

MIN MAX

V1: 1.790 1.790

V2: 1.000 1.014

V3: 1.000 99.000

ADJUSTEMENTS ------

VOL (%)

GRT-1: 1.790

GRT-2: 1.014

________________________________________________

>> RUN 1/4 ## OPTIMIZATION 1 ## STAGE[3] ##

TC0 = 525 & P0 = 8000

... OPTIMIZATION COMPLETED (65 s)...

SI(1.0338)AL(0.37643)FE(0.066664)MN(0)MG(0.055094)CA(0.030165)NA(0.058833)TI(0.0095587)K(0.10293)H(1)O(?)O(0) * FG14-20

TC = 512.7394 & P = 7338.0934

Composition of GARNET: Alm(0.62268) # Gro(0.32762) # Pyr(0.049695) # Spe(0)

Volume fraction of GARNET = 1.0103 (in vol-% of the system)

Subsystem volume fraction = 97.1956 (in vol-% of the system)

Density of GARNET/MATRIX = 3.9981/2.785 (in g/ccm)

Residue = 0.044349

--> TEMPORARY SOLUTION (to be used as input for optimization 2)

________________________________________________

>> RUN 2/4 ## OPTIMIZATION 1 ## STAGE[3] ##

TC0 = 525 & P0 = 16000

... OPTIMIZATION COMPLETED (99 s)...

SI(1.0338)AL(0.37643)FE(0.066664)MN(0)MG(0.055094)CA(0.030165)NA(0.058833)TI(0.0095587)K(0.10293)H(1)O(?)O(0) * FG14-20

TC = 472.6356 & P = 17211.3332

Composition of GARNET: Alm(0.72186) # Gro(0.2313) # Pyr(0.046837) # Spe(0)

Volume fraction of GARNET = 1.0012 (in vol-% of the system)

Subsystem volume fraction = 97.1956 (in vol-% of the system)

Density of GARNET/MATRIX = 4.1012/2.9217 (in g/ccm)

Residue = 0.17514

--> TEMPORARY SOLUTION (to be used as input for optimization 2)

________________________________________________

>> RUN 3/4 ## OPTIMIZATION 1 ## STAGE[3] ##

TC0 = 775 & P0 = 8000

... OPTIMIZATION COMPLETED (120 s)...

SI(1.0338)AL(0.37643)FE(0.066664)MN(0)MG(0.055094)CA(0.030165)NA(0.058833)TI(0.0095587)K(0.10293)H(1)O(?)O(0) * FG14-20

TC = 512.9194 & P = 8618.9218

Composition of GARNET: Alm(0.64734) # Gro(0.30349) # Pyr(0.049168) # Spe(0)

Volume fraction of GARNET = 1.0091 (in vol-% of the system)

Subsystem volume fraction = 97.1956 (in vol-% of the system)

Density of GARNET/MATRIX = 4.0198/2.8343 (in g/ccm)

Residue = 0.074549

--> TEMPORARY SOLUTION (to be used as input for optimization 2)

________________________________________________

>> RUN 4/4 ## OPTIMIZATION 1 ## STAGE[3] ##

TC0 = 775 & P0 = 16000

... OPTIMIZATION COMPLETED (85 s)...

SI(1.0338)AL(0.37643)FE(0.066664)MN(0)MG(0.055094)CA(0.030165)NA(0.058833)TI(0.0095587)K(0.10293)H(1)O(?)O(0) * FG14-20

TC = 472.3746 & P = 17233.7084

Composition of GARNET: Alm(0.7215) # Gro(0.23163) # Pyr(0.046873) # Spe(0)

Volume fraction of GARNET = 1.0148 (in vol-% of the system)

Subsystem volume fraction = 97.1956 (in vol-% of the system)

Density of GARNET/MATRIX = 4.101/2.9218 (in g/ccm)

Residue = 0.17466

--> TEMPORARY SOLUTION (to be used as input for optimization 2)

...

==> SOLUTION (1) is selected for OPTIMIZATION 2

*** OPTIMIZATION 2

INPUT VARIABLES --------------------------------------------------------------------------

1 2 3 4 5 6 7 8 9 10

TC: 513 513 513 0 0 0 0 0 0 0

P: 7338 7338 7338 0 0 0 0 0 0 0

X1: 1.79 1.79 1.79 0.00 0.00 0.00 0.00 0.00 0.00 0.00

X2: 1.01 1.00 1.01 0.00 0.00 0.00 0.00 0.00 0.00 0.00

LIMITS -------------------

MIN MAX

V1: 1.790 1.790

V2: 1.000 1.014

V3: 1.000 99.000

________________________________________________

>> RUN 1/3 ## OPTIMIZATION 2 ## STAGE[3] ##

TC0 = 512.7394 & P0 = 7338.0934

X0-1 = 1.7903

X0-2 = 1.0141

... OPTIMIZATION COMPLETED (42 s)...

SI(1.0338)AL(0.37643)FE(0.066664)MN(0)MG(0.055094)CA(0.030165)NA(0.058833)TI(0.0095587)K(0.10293)H(1)O(?)O(0) * FG14-20

TC = 512.7394 & P = 7340.8703

X-1 = 1.7903

X-2 = 1.0141

----

Composition of GARNET: Alm(0.62274) # Gro(0.3276) # Pyr(0.049656) # Spe(0)

Volume fraction of GARNET = 1.0068 (in vol-% of the system)

Subsystem volume fraction = 97.1956 (in vol-% of the system)

Density of GARNET/MATRIX = 3.9982/2.7851 (in g/ccm)

Residue = 0.044374

--> SOLUTION (residue is lower than STOL [0.05])

________________________________________________

>> RUN 2/3 ## OPTIMIZATION 2 ## STAGE[3] ##

TC0 = 512.7394 & P0 = 7338.0934

X0-1 = 1.79

X0-2 = 1

... OPTIMIZATION COMPLETED (34 s)...

SI(1.0337)AL(0.37642)FE(0.066696)MN(0)MG(0.055087)CA(0.030187)NA(0.058824)TI(0.0095574)K(0.10291)H(1)O(?)O(0) * FG14-20

TC = 512.7394 & P = 7338.0934

X-1 = 1.79

X-2 = 1.0061

----

Composition of GARNET: Alm(0.62271) # Gro(0.32763) # Pyr(0.04966) # Spe(0)

Volume fraction of GARNET = 1.0178 (in vol-% of the system)

Subsystem volume fraction = 97.2039 (in vol-% of the system)

Density of GARNET/MATRIX = 3.9981/2.785 (in g/ccm)

Residue = 0.044345

--> SOLUTION (residue is lower than STOL [0.05])

________________________________________________

>> RUN 3/3 ## OPTIMIZATION 2 ## STAGE[3] ##

TC0 = 512.7394 & P0 = 7338.0934

X0-1 = 1.7902

X0-2 = 1.0071

... OPTIMIZATION COMPLETED (33 s)...

SI(1.0337)AL(0.37642)FE(0.066689)MN(0)MG(0.055089)CA(0.030182)NA(0.058826)TI(0.0095577)K(0.10292)H(1)O(?)O(0) * FG14-20

TC = 512.7394 & P = 7343.8263

X-1 = 1.7902

X-2 = 1.0078

----

Composition of GARNET: Alm(0.6228) # Gro(0.32754) # Pyr(0.049657) # Spe(0)

Volume fraction of GARNET = 1.0091 (in vol-% of the system)

Subsystem volume fraction = 97.202 (in vol-% of the system)

Density of GARNET/MATRIX = 3.9982/2.7852 (in g/ccm)

Residue = 0.04444

--> SOLUTION (residue is lower than STOL [0.05])

___________________________________________________________________

>> STAGE[3] ## AUTO-REFINEMENT - SOLUTION (1/3 - Optimization: 1)

SI(1.0338)AL(0.37643)FE(0.066664)MN(0)MG(0.055094)CA(0.030165)NA(0.058833)TI(0.0095587)K(0.10293)H(1)O(?)O(0) * FG14-20

T = 512.7394 & P = 7340.8703

X-1 = 1.7903

X-2 = 1.0141

Res = 0.044374

--> Loop [1] - (2)

--> Loop [2] - (2)

--> Loop [3] - (1)

--> Loop [4] - (1)

--> Loop [5] - (1)

--> Loop [6] - (0)

Garn Volume = 1.0068 +/- 0.3636 vol-%

___________________________________________________________________

>> STAGE[3] ## AUTO-REFINEMENT - SOLUTION (2/3 - Optimization: 2)

SI(1.0337)AL(0.37642)FE(0.066696)MN(0)MG(0.055087)CA(0.030187)NA(0.058824)TI(0.0095574)K(0.10291)H(1)O(?)O(0) * FG14-20

T = 512.7394 & P = 7338.0934

X-1 = 1.79

X-2 = 1.0061

Res = 0.044345

--> Loop [1] - (2)

--> Loop [2] - (2)

--> Loop [3] - (1)

--> Loop [4] - (1)

--> Loop [5] - (1)

--> Loop [6] - (0)

Garn Volume = 1.0178 +/- 0.36672 vol-%

___________________________________________________________________

>> STAGE[3] ## AUTO-REFINEMENT - SOLUTION (3/3 - Optimization: 3)

SI(1.0337)AL(0.37642)FE(0.066689)MN(0)MG(0.055089)CA(0.030182)NA(0.058826)TI(0.0095577)K(0.10292)H(1)O(?)O(0) * FG14-20

T = 512.7394 & P = 7343.8263

X-1 = 1.7902

X-2 = 1.0078

Res = 0.04444

--> Loop [1] - (2)

--> Loop [2] - (2)

--> Loop [3] - (1)

--> Loop [4] - (1)

--> Loop [5] - (1)

--> Loop [6] - (0)

Garn Volume = 1.0091 +/- 0.36043 vol-%

################# STAGE 4/4 #################

*** New computation (see details below)

PARAMETERS -------------------------------

Alm Gro Pyr Spe

FIT: 0.632 0.323 0.037 0.008

WEIGHT: 1600 1750 105 25

*** OPTIMIZATION 1

INPUT VARIABLES --------------------------------------------------------------------------

1 2 3 4 5 6 7 8 9 10

TC: 525 525 775 775 0 0 0 0 0 0

P: 8000 16000 8000 16000 0 0 0 0 0 0

LIMITS -------------------

MIN MAX

V1: 1.790 1.790

V2: 1.000 1.014

V3: 1.000 1.007

V4: 1.000 99.000

ADJUSTEMENTS ------

VOL (%)

GRT-1: 1.790

GRT-2: 1.014

GRT-3: 1.007

________________________________________________

>> RUN 1/4 ## OPTIMIZATION 1 ## STAGE[4] ##

TC0 = 525 & P0 = 8000

... OPTIMIZATION COMPLETED (58 s)...

SI(1.0618)AL(0.38397)FE(0.063646)MN(0)MG(0.056806)CA(0.028057)NA(0.06094)TI(0.009883)K(0.10661)H(1)O(?)O(0) * FG14-20

TC = 517.0817 & P = 8079.5685

Composition of GARNET: Alm(0.62655) # Gro(0.31871) # Pyr(0.054739) # Spe(0)

Volume fraction of GARNET = 1.0132 (in vol-% of the system)

Subsystem volume fraction = 96.1888 (in vol-% of the system)

Density of GARNET/MATRIX = 4.0024/2.7885 (in g/ccm)

Residue = 0.020507

--> TEMPORARY SOLUTION (to be used as input for optimization 2)

________________________________________________

>> RUN 2/4 ## OPTIMIZATION 1 ## STAGE[4] ##

TC0 = 525 & P0 = 16000

... OPTIMIZATION COMPLETED (107 s)...

SI(1.0618)AL(0.38397)FE(0.063646)MN(0)MG(0.056806)CA(0.028057)NA(0.06094)TI(0.009883)K(0.10661)H(1)O(?)O(0) * FG14-20

TC = 474.3016 & P = 17690.1038

Composition of GARNET: Alm(0.7268) # Gro(0.22189) # Pyr(0.051304) # Spe(0)

Volume fraction of GARNET = 1.0187 (in vol-% of the system)

Subsystem volume fraction = 96.1888 (in vol-% of the system)

Density of GARNET/MATRIX = 4.1061/2.9194 (in g/ccm)

Residue = 0.13975

--> TEMPORARY SOLUTION (to be used as input for optimization 2)

________________________________________________

>> RUN 3/4 ## OPTIMIZATION 1 ## STAGE[4] ##

TC0 = 775 & P0 = 8000

... OPTIMIZATION COMPLETED (114 s)...

SI(1.0618)AL(0.38397)FE(0.063646)MN(0)MG(0.056806)CA(0.028057)NA(0.06094)TI(0.009883)K(0.10661)H(1)O(?)O(0) * FG14-20

TC = 518.5506 & P = 8811.4089

Composition of GARNET: Alm(0.6414) # Gro(0.30482) # Pyr(0.053774) # Spe(0)

Volume fraction of GARNET = 1.0118 (in vol-% of the system)

Subsystem volume fraction = 96.1888 (in vol-% of the system)

Density of GARNET/MATRIX = 4.0152/2.824 (in g/ccm)

Residue = 0.027694

--> TEMPORARY SOLUTION (to be used as input for optimization 2)

________________________________________________

>> RUN 4/4 ## OPTIMIZATION 1 ## STAGE[4] ##

TC0 = 775 & P0 = 16000

... OPTIMIZATION COMPLETED (105 s)...

SI(1.0618)AL(0.38397)FE(0.063646)MN(0)MG(0.056806)CA(0.028057)NA(0.06094)TI(0.009883)K(0.10661)H(1)O(?)O(0) * FG14-20

TC = 474.4693 & P = 17667.9321

Composition of GARNET: Alm(0.7269) # Gro(0.22174) # Pyr(0.051354) # Spe(0)

Volume fraction of GARNET = 1.0007 (in vol-% of the system)

Subsystem volume fraction = 96.1888 (in vol-% of the system)

Density of GARNET/MATRIX = 4.1061/2.9193 (in g/ccm)

Residue = 0.13993

--> TEMPORARY SOLUTION (to be used as input for optimization 2)

...

==> SOLUTION (1) is selected for OPTIMIZATION 2

*** OPTIMIZATION 2

INPUT VARIABLES --------------------------------------------------------------------------

1 2 3 4 5 6 7 8 9 10

TC: 517 517 517 0 0 0 0 0 0 0

P: 8080 8080 8080 0 0 0 0 0 0 0

X1: 1.79 1.79 1.79 0.00 0.00 0.00 0.00 0.00 0.00 0.00

X2: 1.01 1.00 1.01 0.00 0.00 0.00 0.00 0.00 0.00 0.00

X3: 1.01 1.00 1.00 0.00 0.00 0.00 0.00 0.00 0.00 0.00

LIMITS -------------------

MIN MAX

V1: 1.790 1.790

V2: 1.000 1.014

V3: 1.000 1.007

V4: 1.000 99.000

________________________________________________

>> RUN 1/3 ## OPTIMIZATION 2 ## STAGE[4] ##

TC0 = 517.0817 & P0 = 8079.5685

X0-1 = 1.7903

X0-2 = 1.0141

X0-3 = 1.0068

... OPTIMIZATION COMPLETED (33 s)...

SI(1.0618)AL(0.38397)FE(0.063646)MN(0)MG(0.056806)CA(0.028057)NA(0.06094)TI(0.009883)K(0.10661)H(1)O(?)O(0) * FG14-20

TC = 517.0817 & P = 8089.0367

X-1 = 1.7903

X-2 = 1.0141

X-3 = 1.0068

----

Composition of GARNET: Alm(0.62676) # Gro(0.31854) # Pyr(0.054705) # Spe(0)

Volume fraction of GARNET = 1.0062 (in vol-% of the system)

Subsystem volume fraction = 96.1888 (in vol-% of the system)

Density of GARNET/MATRIX = 4.0026/2.7887 (in g/ccm)

Residue = 0.020464

--> SOLUTION (residue is lower than STOL [0.05])

________________________________________________

>> RUN 2/3 ## OPTIMIZATION 2 ## STAGE[4] ##

TC0 = 517.0817 & P0 = 8079.5685

X0-1 = 1.79

X0-2 = 1

X0-3 = 1

... OPTIMIZATION COMPLETED (32 s)...

SI(1.0616)AL(0.38393)FE(0.063693)MN(0)MG(0.056793)CA(0.028089)NA(0.060922)TI(0.0098803)K(0.10658)H(1)O(?)O(0) * FG14-20

TC = 517.0817 & P = 8085.8806

X-1 = 1.79

X-2 = 1.0086

X-3 = 1

----

Composition of GARNET: Alm(0.6267) # Gro(0.31859) # Pyr(0.05471) # Spe(0)

Volume fraction of GARNET = 1.0198 (in vol-% of the system)

Subsystem volume fraction = 96.2014 (in vol-% of the system)

Density of GARNET/MATRIX = 4.0025/2.7886 (in g/ccm)

Residue = 0.020471

--> SOLUTION (residue is lower than STOL [0.05])

________________________________________________

>> RUN 3/3 ## OPTIMIZATION 2 ## STAGE[4] ##

TC0 = 517.0817 & P0 = 8079.5685

X0-1 = 1.7902

X0-2 = 1.0071

X0-3 = 1.0034

... OPTIMIZATION COMPLETED (35 s)...

SI(1.0617)AL(0.38396)FE(0.063665)MN(0)MG(0.056801)CA(0.02807)NA(0.060933)TI(0.0098819)K(0.1066)H(1)O(?)O(0) * FG14-20

TC = 517.0817 & P = 8079.5685

X-1 = 1.7902

X-2 = 1.0126

X-3 = 1.0034

----

Composition of GARNET: Alm(0.62658) # Gro(0.3187) # Pyr(0.054714) # Spe(0)

Volume fraction of GARNET = 1.0178 (in vol-% of the system)

Subsystem volume fraction = 96.1939 (in vol-% of the system)

Density of GARNET/MATRIX = 4.0024/2.7885 (in g/ccm)

Residue = 0.020479

--> SOLUTION (residue is lower than STOL [0.05])

___________________________________________________________________

>> STAGE[4] ## AUTO-REFINEMENT - SOLUTION (1/3 - Optimization: 1)

SI(1.0618)AL(0.38397)FE(0.063646)MN(0)MG(0.056806)CA(0.028057)NA(0.06094)TI(0.009883)K(0.10661)H(1)O(?)O(0) * FG14-20

T = 517.0817 & P = 8089.0367

X-1 = 1.7903

X-2 = 1.0141

X-3 = 1.0068

Res = 0.020464

--> Loop [1] - (5)

--> Loop [2] - (2)

--> Loop [3] - (2)

--> Loop [4] - (2)

--> Loop [5] - (2)

--> Loop [6] - (2)

--> Loop [7] - (1)

--> Loop [8] - (0)

Garn Volume = 1.0062 +/- 0.93022 vol-%

___________________________________________________________________

>> STAGE[4] ## AUTO-REFINEMENT - SOLUTION (2/3 - Optimization: 2)

SI(1.0616)AL(0.38393)FE(0.063693)MN(0)MG(0.056793)CA(0.028089)NA(0.060922)TI(0.0098803)K(0.10658)H(1)O(?)O(0) * FG14-20

T = 517.0817 & P = 8085.8806

X-1 = 1.79

X-2 = 1.0086

X-3 = 1

Res = 0.020471

--> Loop [1] - (5)

--> Loop [2] - (2)

--> Loop [3] - (2)

--> Loop [4] - (2)

--> Loop [5] - (2)

--> Loop [6] - (2)

--> Loop [7] - (1)

--> Loop [8] - (0)

Garn Volume = 1.0198 +/- 0.92985 vol-%

___________________________________________________________________

>> STAGE[4] ## AUTO-REFINEMENT - SOLUTION (3/3 - Optimization: 3)

SI(1.0617)AL(0.38396)FE(0.063665)MN(0)MG(0.056801)CA(0.02807)NA(0.060933)TI(0.0098819)K(0.1066)H(1)O(?)O(0) * FG14-20

T = 517.0817 & P = 8079.5685

X-1 = 1.7902

X-2 = 1.0126

X-3 = 1.0034

Res = 0.020479

--> Loop [1] - (5)

--> Loop [2] - (2)

--> Loop [3] - (2)

--> Loop [4] - (2)

--> Loop [5] - (2)

--> Loop [6] - (2)

--> Loop [7] - (1)

--> Loop [8] - (0)

Garn Volume = 1.0178 +/- 0.89535 vol-%

-----------------------------------

| FINAL RESULTS |

-----------------------------------

-> GARNET RESORPTION (vol-%)

Grt1 Grt2 Grt3 Grt4 Total

Stage 1 0.000 0.000 0.000 0.000 0.000

Stage 2 0.037 0.000 0.000 0.000 0.037

Stage 3 0.000 0.000 0.000 0.000 0.000

Stage 4 0.000 0.000 0.000 0.000 0.000

-> VOLUME OF GARNET (vol-%)

Grt1 Grt2 Grt3 Grt4 Total

Stage 1 1.827 0.000 0.000 0.000 1.827

Stage 2 1.790 1.014 0.000 0.000 2.804

Stage 3 1.790 1.014 1.007 0.000 3.811

Stage 4 1.790 1.014 1.007 1.006 4.817

-> NEWLY GROWN GARNET (vol-%)

Grt1 Grt2 Grt3 Grt4 Total

Stage 1 1.827 0.000 0.000 0.000 1.827

Stage 2 0.000 1.014 0.000 0.000 1.014

Stage 3 0.000 0.000 1.007 0.000 1.007

Stage 4 0.000 0.000 0.000 1.006 1.006

-> ROCK DENSITY (g/ccm)

Density

Stage 1 2.806

Stage 2 2.819

Stage 3 2.831

Stage 4 2.847

# S9 Allanite secondary standard ages

The ages of the secondary standards are reported in the Excel document S9 Secondary standard age data.

# S10 Zircon ages

The errors are given as 2σ for individual dates, as 95% confidence level for weighted mean ages (Excel document S10 Zircon age data).

# S11 Concordia diagrams of the Alpine age data for zircon

Concordia plots show the individual spot analyses of Alpine zircon in Ma, obtained using Isoplot (Ludwig, 2003: Isoplot/Ex version 3.0. A Geochronological Toolkit for Microsoft Excel. Berkeley Geochronological Centre Spec. Pub., Berkeley 70p.).


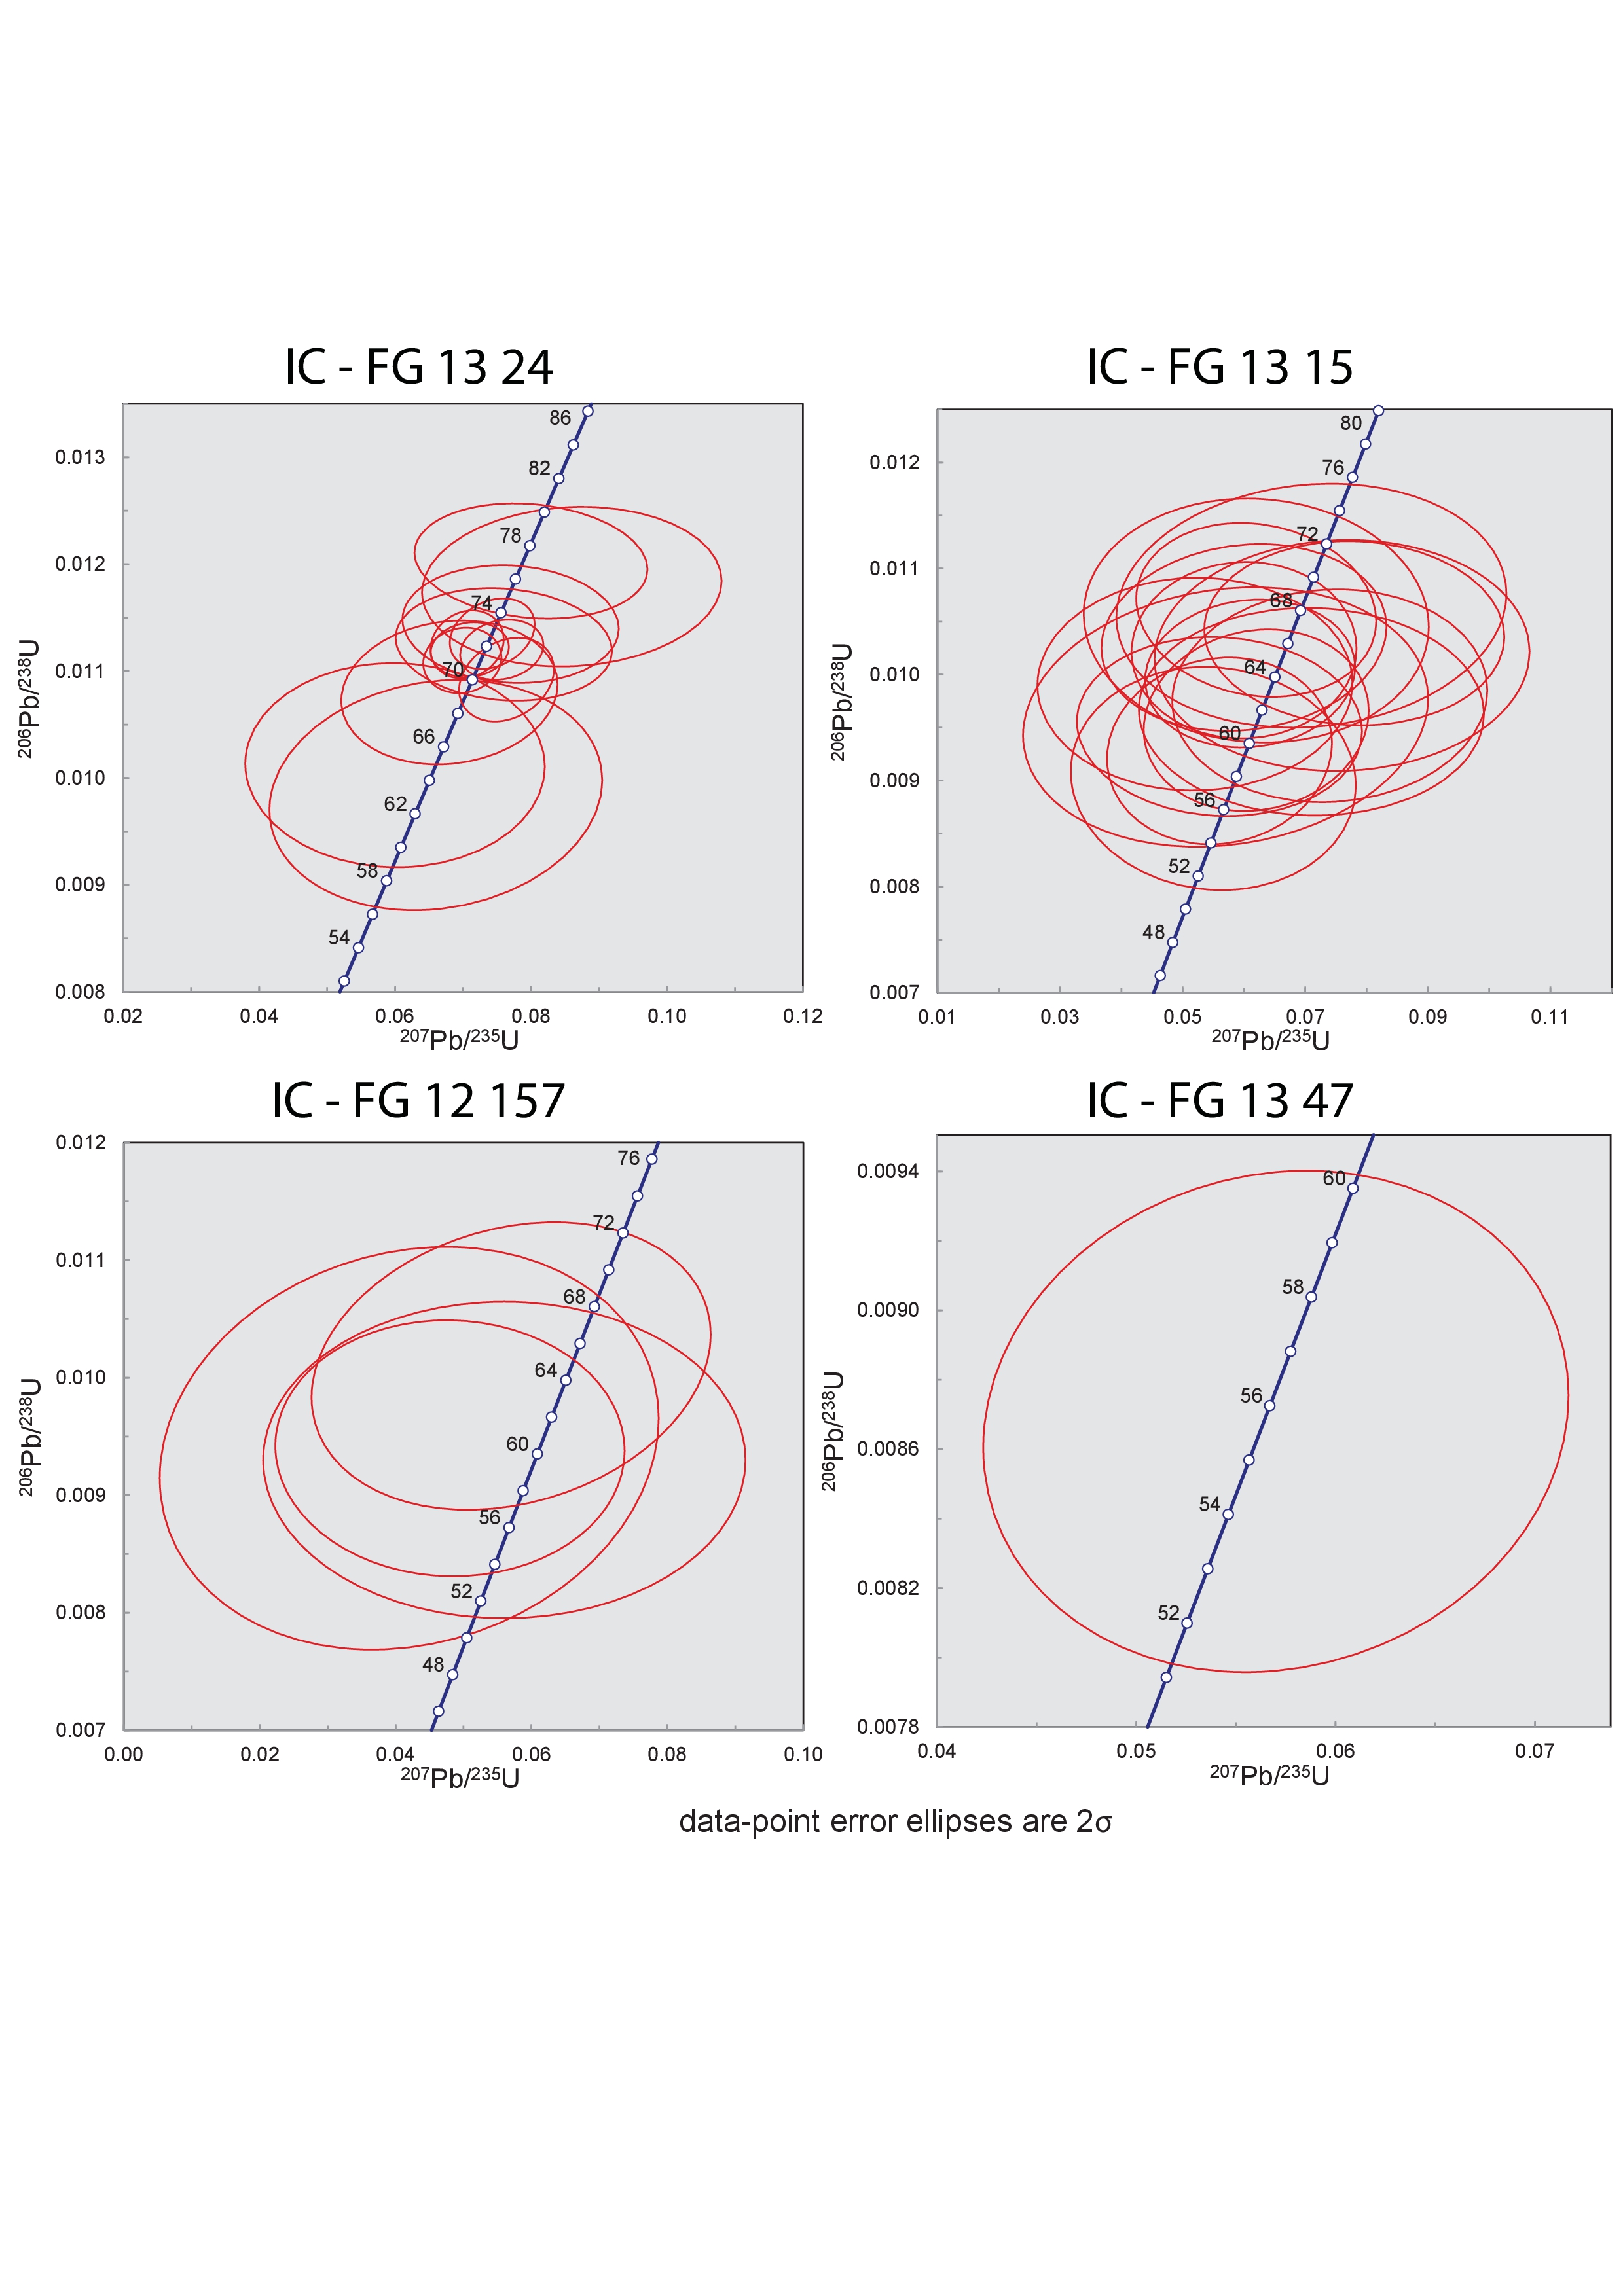

Supplement: Supplementary file 2 [file se-9-191-2018-supplement.zip › Supplement.docx]
