# Supplementary material for: Deeply subducted continental fragments – Part 2: Insight from petrochronology in the central Sesia Zone (western Italian Alps)
Source: Copernicus journal article supplement (doi:10.5194/se-9-191-2018), 2018-02-26
Supplement: Supplementary file 2 [file se-9-191-2018-supplement.zip]

Archive with 6 entries (6 files):
- S3 Thermodynamic database.xlsx
- S5 Mineral compositions.xlsx
- S9 Secondary standard age data.xlsx
- se-9-191-2018-supplement-title-page.pdf
- S10 Zircon age data.xlsx
- Supplement.docx
