# Supplementary material for: Deeply subducted continental fragments – Part 2: Insight from petrochronology in the central Sesia Zone (western Italian Alps)
Source: Copernicus journal article supplement (doi:10.5194/se-9-191-2018), 2018-02-26
Supplement: Supplementary file 2 [file se-9-191-2018-supplement.zip › S3 Thermodynamic database.xlsx]

## Sheet: Electronic Appendix 9
25
O AL BA C CA CL CO
CU F FE H K MN MG
NA NI P S SI SR TI
ZN ZR B E
15.99940 26.98154 137.32700 12.01100 40.07800 35.45270 58.93320
63.54600 18.99840 55.84700 1.00794 39.09830 54.93085 24.30500
22.98977 58.69000 30.97362 32.06600 28.08550 87.62000 47.88000
65.39000 91.22400 10.81000 1.00000
0.0 1.5 1.0 2.0 1.0 0.0 1.0
1.0 0.0 1.0 0.5 0.5 1.0 1.0
0.5 1.0 1.0 0.0 2.0 1.0 2.0
1.0 2.0 0.0 0.0
****MINERAL DATA***** from RG Berman (J.Petrology, v.29, 1988) with
! changes by Capi: comment out: ALBITE (HIGH)
! ALBITE (LOW)
! K-FELDSPAR (HIGH)
! K-FELDSPAR (LOW)
! rename: K-FELDSPAR -> POTASSIUM FELDSPAR
! re-define: ORTHOENSTATITE -> 2 X
! FERROSILITE -> 2 X
!
! preliminary/provisional properties for andradite, baddelyite, Fe cordierite,
! geikelite, hedenbergite, hercynite, kalsilite, leucite, nepheline,
! staurolite, zircon,
! Feb,89: modified Almandine, Ilmenite, Phlogopite; added annite consistent with
! proposed Fe-Mg garnet mixing properties (Berman, American Mineralogist,
! v. 75, p. 328-344, 1990)
! Nov,89: modified staurolite, Fe-cordierite, hercynite for consistency with
! almandine
! Feb,90: corrected Hydrogen gas Cp coefficient
! Aug,90: changed annite and biotite solution properties (McMullin et al., 1991
! Canadian Mineralogist (1991, v. 29, 833-855)
! Aug, 91: added pumpellyite, glaucophane from Evans (1990)
! orthoenstatite formula doubled for ease of solid solution modelling
! calcite, magnesite modified by Mader and Berman (1991,Amer Mineral)
! abbreviation of CORDIERITE changed to 'Cd' in order to match entry into
! hydration model routine
! preliminary properties for ferrotremolite, tschermakite, ferrotschermakite,
! pargasite, ferropargasite: fit 210, IGCP-304 conference, May 92, Urs Mader;
! ref: Mader & Berman, 1992, Current Research, Part E, Geological Survey of Canada,
! Paper 92-1E; (revised properties)
!
!========================================================================
! main block of MINERAL DATA
!========================================================================
!
****MINERAL DATA***** from RG Berman (J.Petrology, v.29, 1988) with
AKERMANITE MG(1)CA(2)SI(2)O(7) Ak AKER
ST -3667112.00 -3860441.19 212.0000 9.252 1.00000
C1 387.06396 -2938.769 0.000 -40790480. 0.00000
V1 2.50112887 0.00067224 -0.07851406 0.00000000 0.00000000
T1 358.00 298.15 0.00000000 0.00000000 452.00
ANTIGORITE MG(48)SI(34)O(99)H(62)O(48) Atg ANTI
ST -66151354.00 -71364156.29 3602.9958 174.246 1.00000
C1 7394.51172 0.000 -548363008.000 87284121600. 0.00000
V1 2.49647051 0.00039444 -0.19777757 0.00049442 0.00000000
BADDELYITE ZR(1)O(2) Bd BADD
! All properties are provisional estimates not included in JPet 1988 paper
ST 0.00 -1100560.00 50.3800 2.115 3.00000
C1 89.49913 -374.135 -1602304.000 161287724. 0.00000
T1 1478.00 298.15 0.00000000 0.00000000 330.00
BRUCITE MG(1)O(2)H(2) Br BRUC
ST -834549.00 -925936.60 63.0642 2.468 1.00000
C1 136.83899 -537.130 -4361949.000 552694528. 0.00000
V1 3.28538493 0.00010940 -0.20228525 0.00067261 0.00000000
CHRYSOTILE MG(3)SI(2)O(9)H(4) Chr CRYS
ST -4039429.00 -4363356.18 220.1345 10.720 1.00000
C1 610.02197 -5581.152 -1857300.000 195472000. 0.00000
V1 2.71512687 0.00067351 -0.18102799 0.00045243 0.00000000
DIASPORE AL(1)O(2)H(1) Dsp DIAS
ST -920021.00 -999377.89 35.3082 1.776 1.00000
C1 143.23953 -1540.409 -323098.000 64632256. 0.00000
V1 2.97180367 0.00000000 -0.05992916 0.00000000 0.00000000
GEHLENITE AL(2)CA(2)SI(1)O(7) Ge GEHL
ST -3775355.00 -3988157.80 198.6000 9.033 1.00000
C1 373.08740 -2276.755 -4778466.000 477911808. 0.00000
V1 2.49260884 0.00005664 -0.09964904 0.00024878 0.00000000
D1 -221.74000 0.00000 17291280.00000 0.00000 0.00000
D2 0.36950 -0.00015 698.15000 1600.00000 0.00000
HEMATITE FE(2)O(3) Hm HEMA
ST -743715.00 -825627.39 87.4371 3.027 1.00000
C1 146.85840 0.000 -5576782.000 525627904. 0.00000
V1 3.83095170 0.00001650 -0.04789400 0.00003040 0.00000000
T1 955.65 298.15 -0.07403236 0.00027921 1287.92
KALSILITE K(1)AL(1)SI(1)O(4) Kls KALI
! All properties are provisional estimates not included in JPet 1988 paper
ST 0.00 -2111813.55 133.9653 5.989 3.00000
C1 186.00261 0.000 -13106745.000 2138928128. 0.00000
V1 2.34867257 0.00140257 -0.15670396 0.00000000 0.00000000
T1 800.15 298.15 -0.07096454 0.00021682 1154.00
KAOLINITE AL(2)SI(2)O(9)H(4) Kln KAOL
ST -3797448.00 -4120327.22 203.7000 9.952 2.00000
C1 523.23291 -4426.668 -2244259.000 92308768. 0.00000
V1 3.20000000 0.00000000 -0.12000000 0.00000000 0.00000000
LAWSONITE CA(1)AL(2)SI(2)O(10)H(4) Lw LAWS
ST -4508229.00 -4865665.95 229.1759 10.144 1.00000
C1 728.67310 -8248.055 0.000 850556416. 0.00000
V1 2.62833695 0.00000000 -0.07688091 0.00019223 0.00000000
ALEUCITE K(1)AL(1)SI(2)O(6) aLc ALUC
! All properties are provisional estimates not included in JPet 1988 paper
ST 0.00 -3021141.60 199.2000 8.839 3.00000
C1 271.13965 -944.133 -7857238.000 959202560. 0.00000
V1 1.87804050 0.01047630 -0.17999774 0.00045028 0.00000000
T1 955.15 298.15 -0.09730853 0.00033730 0.00
BLEUCITE K(1)AL(1)SI(2)O(6) bLc BLUC
! All properties are provisional estimates not included in JPet 1988 paper
ST 0.00 -3012026.03 210.7042 9.263 3.00000
C1 271.13965 -944.133 -7857238.000 959202560. 0.00000
V1 1.25167877 0.00000000 -0.15568254 0.00012739 0.00000000
LIME CA(1)O(1) Lm LIME
ST -603418.00 -635090.00 37.7500 1.676 2.00000
C1 58.79117 -133.904 -1147146.000 102978784. 0.00000
V1 3.46103555 0.00067406 -0.10217132 0.00025650 0.00000000
MAGNETITE FE(3)O(4) Mt MAGN
ST -1014343.00 -1117402.53 146.1142 4.452 1.00000
C1 207.93083 0.000 -7243337.000 664356352. 0.00000
V1 3.02910360 0.00138470 -0.05817030 0.00017510 0.00000000
T1 848.15 298.15 -0.19502452 0.00061037 1565.57
MEIONITE CA(4)AL(6)SI(6)O(27)C(1) Me MEIO
ST -13102086.00 -13849722.94 730.0000 34.036 2.00000
C1 1511.34497 -13243.328 0.000 -751613952. 0.00000
V1 0.93400000 0.00000000 -0.11102715 0.00000000 0.00000000
MERWINITE CA(3)MG(1)SI(2)O(8) Mw MERW
ST -4311116.00 -4537497.44 251.7767 9.847 1.00000
C1 453.61963 -3250.015 0.000 -344227072. 0.00000
V1 2.93755865 0.00087235 -0.05505433 0.00013811 0.00000000
MONTICELLITE CA(1)MG(1)SI(1)O(4) Mo MONT
ST -2135224.00 -2250027.48 108.3000 5.148 1.00000
C1 226.34225 -1542.741 -1179709.000 -23285888. 0.00000
V1 2.78631922 0.00076339 -0.09036547 0.00020000 0.00000000
NEPHELINE NA(1)AL(1)SI(1)O(4) Ne NEPH
! All properties are provisional estimates not included in JPet 1988 paper
ST 0.00 -2087975.81 124.2000 5.422 3.00000
C1 205.24190 -759.898 -10838267.000 2081817344. 0.00000
V1 3.15522000 0.00200000 -0.22205720 0.00060000 0.00000000
T1 467.15 298.15 -1.02784061 0.00339448 241.84
T3 1180.15 298.15 0.00000000 0.00000000 2393.00
PERICLASE MG(1)O(1) Pe PERI
ST -569164.00 -601500.00 26.9514 1.125 1.00000
C1 61.10965 -296.199 -621154.000 5844612. 0.00000
V1 3.74774182 0.00003556 -0.06223329 0.00015114 0.00000000
PREHNITE CA(2)AL(2)SI(3)O(12)H(2) Prh PREH COMPROMISE BETW. CP,S
ST -5817852.00 -6198606.33 288.6335 14.016 3.00000
C1 716.05176 -6404.609 -2182456.000 268502784. 0.00000
V1 0.14684075 0.01128353 -0.14269406 0.00000000 0.00000000
PYROPHYLLITE AL(2)SI(4)O(12)H(2) Prl PYPH
ST -5264450.00 -5640780.66 239.4000 12.760 1.00000
C1 665.93066 -5897.422 -4979913.000 661808896. 0.00000
V1 1.26374216 0.00381661 -0.13544906 0.00000000 0.00000000
RUTILE TI(1)O(2) Rt RUTI
ST -891336.00 -944750.00 50.4600 1.882 1.00000
C1 77.83762 0.000 -3367841.000 402940672. 0.00000
V1 2.57156217 0.00015409 -0.04542508 0.00005845 0.00000000
SPHENE CA(1)TI(1)SI(1)O(5) Sph SPHE
ST -2454203.00 -2596652.15 129.2900 5.565 1.00000
C1 234.62025 -1040.294 -5118324.000 591460608. 0.00000
V1 2.52000000 0.00000000 -0.05900000 0.00000000 0.00000000
TALC MG(3)SI(4)O(12)H(2) Tc TALC
ST -5520258.00 -5897386.72 261.2405 13.610 1.00000
C1 664.10522 -5187.172 -2147218.000 -327371776. 0.00000
V1 2.94468112 0.00000000 -0.16988979 0.00056650 0.00000000
WOLLASTONITE CA(1)SI(1)O(3) Wo WOLL
ST -1545999.00 -1631500.00 81.8100 3.983 1.00000
C1 149.07266 -690.295 -3659348.000 484349440. 0.00000
V1 2.81800151 0.00000000 -0.12449159 0.00031132 0.00000000
PSEUDOWOLLASTONITE CA(1)SI(1)O(3) pWo PSWO
ST -1542618.00 -1627427.11 85.2788 4.016 1.00000
C1 141.15611 -417.232 -5857595.000 940734976. 0.00000
V1 2.81800151 0.00000000 -0.12449159 0.00031132 0.00000000
ZIRCON ZR(1)O(4)SI(1) Zc ZIRC
! All properties are provisional estimates not included in JPet 1988 paper
ST 0.00 -2031900.00 84.0300 3.926 3.00000
C1 166.70241 -434.320 -7348579.000 1040502569. 0.00000
!
!========================================================================
! some additions
!========================================================================
!
!PEROVSKITE CA(1)TI(1)O(3) Pvk PVKT
! ST -1575256. -1660630.000 93.640 3.363
! C3 12.49600 0.045156 -6301800.000
! V1 2.72476341 0.00029968 -0.05839748 0.00012303 0.0
!! ST, C3 from Robie et al. (1978) added by Capi
!! V1 is ilmenite
!
! Mg-carpholite dH fitted to Chopin & Schreyer (1983)
! other parameters as in Holland and Powell (1998)
Mg-carpholite SI(2)AL(2)MG(1)O(10)H(4) mcar 1nh
! ST 0.0 -4781240.000 210.0000 10.5900
ST 0.0 -4782240.000 210.0000 10.5900
C3 667.80000 -0.0125590 -1167100.0 -6440.000 0.00
VHP 0.000050000 525.0 0.0000 0.00 0.00000
VH2 10.0000 4.0000 -0.000078750
!
****COMMENTS******
THE NAMES OF THE GASES CAN NOT BE CHANGED AS THEY ARE USED
TO RECOGNIZE WHICH GAS ROUTINE SHOULD BE USED.
ST is the code for standard STATE PROPERTIES - G, H, S, V
UNITS: J, J, J/DEG, J/bar
NOTE: G = H - T*S where S is third law entropy, not
entropy of formation; i.e. its an apparent G of formation
CP calculated with eqn:
Cp = K0 + K1/SQRT(T) + K2/T/T + K3/T/T/T + K4/T + K5*T + K6*T*T
C1 IS THE CODE FOR THE FIRST LINE OF CP TERMS - K0, K1, K2, K3
C2 IS THE CODE FOR THE 2ND LINE OF CP TERMS - K4, K5, K6
C3 IS THE CODE FOR MAIER-KELLY CP EQUATION - K0, K5, K2
UNITS: J AND DEGREES
CP(disorder) calculated by:
Cp(dis) = D0 + D1/SQRT(T) + D2/T/T + D3/T + D4*T + D5*T*T
To get H, S (disorder), this eqn integrated by TMIN and TMAX
D1 IS THE CODE FOR THE FIRST LINE OF DISORDER TERMS - D0, D1, D2, D3
UNITS: J AND DEGREES
D2 IS THE CODE FOR THE SECOND LINE OF DISORDER TERMS - D4, D5, TMIN, TMAX
UNITS: J AND DEGREES
LAMBDA HEAT CAPACITY EQUATION IS:
CP(LAMBDA) = T * (L1 + L2 * T)**2
T1 (T3,T5 FOR MORE TRANSITIONS) IS THE CODE FOR THE FIRST LINE OF TRANSITION
TERMS - T TRANS(K), REFERENCE T FOR INTEGRATION, LAMBDA
CP TERM L1, LAMBDA CP TERM L2, HEAT OF TRANSITION
UNITS: J AND DEGREES
(SEE BERMAN AND BROWN, 1985, CMP, 89, 168-183)
T2 (T4,T6 FOR MORE TRANSITIONS) IS THE CODE FOR THE SECOND LINE OF TRANS
TERMS - DT/DP SLOPE OF TRANSITION, PARAMETER FOR HIGHER
ORDER FIT OF TRANSITION T AS FUNCTION OF P, DV/DT FOR
LOW T POLYMORPH, DV/DP FOR LOW T POLYMORPH
UNITS: JOULES, BARS, DEGREES
VOLUME EQUATION:
V(P,T)/V(1,298) = 1 + V1(T-298) + V2(T-298)**2 + V3(P-1) + V4(P-1)**2
V1 IS THE CODE FOR VOLUME PARAMETERS - V1, V2,V3,V4
NOTE: V1,V2,V3 terms need to be divided by 10**5, V4 by 10**8
!
!========================================================================
! zeolites and very low grade minerals
!========================================================================
!
****MINERAL DATA***** additions by Capi (Very Low Grade)
HEULANDITE CA(1)AL(2)SI(7)H(12)O(24) Heu Nh HEU
! data added by CAPI.
! C1: predicted (B&B 1985), V1: 3 LW + 5 AQZ - 2 AN
! V0: tables of mineralogy
ST 0.00 -10565396.80 734.372937 31.80250
C1 1355.95400 -9155.550 -22391220.00 3124286000.
V1 2.675699696 -0.000266016 -0.079773389 0.000344341
!HEUkreis CA(1)AL(2)SI(7)H(12)O(24) Hek N
!! data added by CAPI. Produces a circle for reaction: Heu=Lmt+3Qz+2w
!! C1: predicted (B&B 1985), V1: 3 LW + 5 AQZ - 2 AN
! ST 0.00 -10558895.34 745.000000 30.84045
! C1 1355.95400 -9155.550 -22391220.00 3124286000.
! V1 2.675699696 -0.000266016 -0.079773389 0.000344341
LAUMONTITE CA(1)AL(2)SI(4)O(16)H(8) Lmt LMT
! data added by CAPI. C1: predicted (B&B 1985), V1: 2 LW + 2 AQZ - AN
! V0: Liou (1970)
!ST -6709847. -7277149.000 434.750 20.3700 0.0
!ST -6709847.00 -7258743.14 470.204082 20.37000
ST -6709847.00 -7261180.50 463.333333 20.37000
C1 917.37700 -6131.500 -14805540.00 2022583000.
V1 2.610028122 -0.000203757 -0.067858953 0.000260199
STILBITE CA(1)AL(2)SI(7)H(14)O(25) Stb STB
! data added by CAPI.
! C1: predicted (B&B 1985), V1: 3.5 LW + 5 AQZ - 2.5 AN
! V0: Liou (1970)
!ST 0.00 0.00 0.000000 32.86740
ST 0.00 -10889880.20 718.666667 32.86740
C1 1443.57100 -9913.690 -22391220.00 3129577000.
V1 2.827265455 -0.000321747 -0.069550624 0.000314168
WAIRAKITE CA(1)AL(2)SI(4)H(4)O(14) Wa WKA
! data added by CAPI. C1: predicted (B&B 1985), V1: LW + 2 AQZ
! V0: Liou (1970)
!ST -6218243.00 -6666476.00 367.600000 19.04640
ST -6218243.00 -6661077.15 377.777042 19.04640
C1 742.14300 -4615.220 -14805540.00 2012001000.
V1 1.969149330 -0.000000000 -0.098971900 0.000343917
!PUMPELLYITE CA(4)AL(5)MG(1)SI(6)O(28)H(7) Pmp PUMP
!! from Evans (1990, Lithos)
! ST 0.00 -14402300.00 584.0000 29.550 3.00000
! C1 1576.00000 -10603.800 -28304200.000 3838351000. 0.00000
! V1 3.46700000 0.00000000 -0.05151600 0.00012880 0.00000000
PUMPELLYITE2 CA(4)AL(5)MG(1)SI(6)O(28)H(7) Pmp2 PUMP
!! Data entered by El-Shazly, Nov, 89, all from Holland.
!ST -13444859. -14384490. 629.000 29.550
!ST -13444859.00 -14371160.00 629.000000 29.55000
ST -13444859.00 -14380034.80 614.757965 29.55000
C1 1720.8 -14620.300 -5998700.0 0.0 0.0
C2 0.0 -0.0249280 0.0 0.0 0.0
V1 2.978003384 0.0 -0.060913706 0.0
!MG-PUMPELLYITE CA(4)AL(4)MG(2)SI(6)O(28)H(8) Mg-Pmp PUMP
!!ST 0.00 0.00 -11.526067 0.00000
! ST 0.00 0.00 20.473933 0.00000
! C1 0.0 0.000 0.0 0.0 0.0
!COM PUMPELLYITE[1]BRUCITE[1]DIASPORE[-1]
!AL-PUMPELLYITE CA(4)AL(6)SI(6)O(28)H(6) Al-Pmp PUMP
!!ST 0.00 0.00 -11.526067 0.00000
! ST 0.00 0.00 -43.526067 0.00000
! C1 0.0 0.000 0.0 0.0 0.0
!COM PUMPELLYITE[1]BRUCITE[-1]DIASPORE[1]
!
!========================================================================
! System Si-Al-O
!========================================================================
!
****MINERAL DATA***** from RG Berman (J.Petrology, v.29, 1988) Si - Al - O
A-QUARTZ SI(1)O(2) aQz zAQTZ
ST -856227.00 -910699.95 41.4600 2.269 1.00000
C1 80.01199 -240.276 -3546684.000 491568384. 0.00000
V1 2.38945698 0.00000000 -0.24339298 0.00101375 0.00000000
T1 848.00 373.00 -0.09186959 0.00024607 0.00
T2 0.023743 0.000000 0.0000000000 0.0000000000 0.00000
B-QUARTZ SI(1)O(2) bQz BQTZ
ST -856227.00 -908626.77 44.2068 2.370 1.00000
C1 80.01199 -240.276 -3546684.000 491568384. 0.00000
V1 0.00000000 0.00000000 -0.12382672 0.00070871 0.00000000
COESITE SI(1)O(2) Cs COES
ST 0.00 -907604.10 39.4244 2.064 1.00000
C1 94.90714 -767.338 -527867.000 26270730. 0.00000
V1 0.73963178 0.00043605 -0.10368217 0.00030000 0.00000000
CORUNDUM AL(2)O(3) Co CORU
ST -1580958.00 -1675699.95 50.8200 2.558 1.00000
C1 155.01888 -828.387 -3861363.000 409083648. 0.00000
V1 2.13415030 0.00047180 -0.03852190 0.00003750 0.00000000
ALPHA CRISTOBALITE SI(1)O(2) aCr ACRS
ST -853448.00 -907753.35 43.3943 2.587 1.00000
C1 83.51360 -374.693 -2455360.000 280072192. 0.00000
V1 2.08240619 0.00000000 -0.25145068 0.00000000 0.00000000
T1 535.15 298.15 -0.14216187 0.00044142 0.00
T2 0.048000 0.000000 0.0000000000 0.0000000000 0.00000
BETA CRISTOBALITE SI(1)O(2) bCr BCRS
ST -853448.00 -906377.23 46.0288 2.730 1.00000
C1 83.51360 -374.693 -2455360.000 280072192. 0.00000
V1 0.31892080 0.00000000 -0.10997269 0.00055353 0.00000000
LOW TRIDYMITE SI(1)O(2) lTr LTRD
ST -854407.00 -907749.56 43.7702 2.675 1.00000
C1 75.37267 0.000 -5958095.000 958246144. 0.00000
V1 1.93394983 0.00000000 -0.25084238 0.00000000 0.00000000
T1 390.15 298.15 0.42670490 -0.00144575 130.54
HIGH TRIDYMITE SI(1)O(2) hTr HTRD
ST -854407.00 -907045.12 45.5237 2.737 1.00000
C1 75.37267 0.000 -5958095.000 958246144. 0.00000
V1 0.48286524 0.00000000 -0.07396833 0.00037354 0.00000000
ANDALUSITE AL(2)SI(1)O(5) And ANDA PHASE EQ. FIT
ST -2440136.00 -2589972.17 91.4337 5.147 1.00000
C1 236.47818 -1102.941 -7526810.000 936442368. 0.00000
V1 2.34426462 0.00007189 -0.07700408 0.00019235 0.00000000
KYANITE AL(2)SI(1)O(5) Ky KYAN
ST -2441634.00 -2594220.46 82.4300 4.412 1.00000
C1 262.68478 -2001.407 -1999740.000 -63181880. 0.00000
V1 2.39725295 0.00000000 -0.06459655 0.00000000 0.00000000
SILLIMANITE AL(2)SI(1)O(5) Si zSILL
ST -2437847.00 -2586090.58 95.9300 4.983 1.00000
C1 256.73158 -1887.225 -2977353.000 250959080. 0.00000
V1 1.34307044 0.00000000 -0.07525587 0.00000000 0.00000000
!
!========================================================================
! Olivine
!========================================================================
!
****MINERAL DATA***** from RG Berman (J.Petrology, v.29, 1988) olivine
FAYALITE FE(2)SI(1)O(4) Fa FAYA
ST -1380699.00 -1479360.11 150.9300 4.630 1.00000
C1 248.92812 -1923.855 0.000 -139104096. 0.00000
V1 2.65457019 0.00079482 -0.07300000 0.00000000 0.00000000
FORSTERITE MG(2)SI(1)O(4) Fo FORS
ST -2057238.00 -2174419.92 94.0100 4.366 1.00000
C1 238.64137 -2001.261 0.000 -116243280. 0.00000
V1 2.94636649 0.00088633 -0.07913336 0.00013513 0.00000000
!FeMgOLIVINE SI(1)FE(1)MG(1)O(4) FeMgOl mN
! ST 0.00 0.00 0.000000000 0.0000
! C1 0.00000 0.0000 0.000 0.
! COM FAYALITE[0.5] FORSTERITE[0.5]
!MgFeOLIVINE SI(1)FE(1)MG(1)O(4) MgFeOl mN
! ST 0.00 0.00 0.000000000 0.0000
! C1 0.00000 0.0000 0.000 0.
! COM FAYALITE[0.5] FORSTERITE[0.5]
!FeMgOLI SI(1)FE(1)MG(1)O(4) MgFeOli mN
! ST 0.00 0.00 5.763033600 0.0000
! C1 0.00000 0.0000 0.000 0.
! COM FAYALITE[0.5] FORSTERITE[0.5]
!TEPHROITE MN(2)SI(1)O(4) Teph CN
! ST 0.000 -1538156.320 400.250070 4.8610000
! C1 222.466500 -1280.89000 -2765238.00 334119400.0
!
***** SOLUTION DATA *****
OLIVINEi (IDEAL)2 M(2):Mg,Fe
FAYALITE Fe,Fe
FORSTERITE Mg,Mg
!
!========================================================================
! Spinel
!========================================================================
!
****MINERAL DATA***** from RG Berman (J.Petrology, v.29, 1988) spinel
!HERCYNITE FE(1)AL(2)O(4) Hc HERC
!! Provisional properties not included in JPet 1988 paper; derived Nov., 1989
! ST 0.00 -1960924.20 107.0130 4.075 1.00000
!!C1 288.04547 -2888.494 -0.0 65342480. 0.0
! C1 204.26948 -258.256 -9807509.000 1208308510. 0.00000
! V1 1.58188633 0.00096276 -0.05922832 0.00014699 0.00000000
!!
! recalibrated hercynite by Philipp
!
HERCYNITE FE(1)AL(2)O(4) Hc HERC
ST 0.00 -1949310.55 119.901744 4.08000
C1 251.76740 -2044.441 -1348330.000 131500400. 0.00000
V1 1.58188633 0.00096276 -0.05922832 0.00014699 0.00000000
SPINEL MG(1)AL(2)O(4) Sp SPIN
ST -2178401.00 -2300312.74 84.5346 3.977 2.00000
C1 235.89993 -1766.578 -1710415.000 40616928. 0.00000
V1 2.16913776 0.00050528 -0.04894168 0.00000000 0.00000000
!
***** SOLUTION DATA ***** Solution model by Philipp (provisional...)
SPIN (IDEAL,MARGULES)
SPINEL
HERCYNITE
***** MARGULES PARAMETER *****
SPINEL - HERCYNITE
12 -4661.1144 0.0000 0.0000 0.0000 0.0000
!
!========================================================================
! Ilmenite-Geikelite
!========================================================================
!
****MINERAL DATA***** from RG Berman (J.Petrology, v.29, 1988) ilmenite
ILMENITE FE(1)TI(1)O(3) Ilm ILME
ST 0.00 -1232448.00 108.6275 3.170 1.00000
C1 149.99950 -441.622 -3323694.000 348151040. 0.00000
V1 2.72476341 0.00029968 -0.05839748 0.00012303 0.00000000
GEIKELITE MG(1)TI(1)O(3) Gk GEIK
! All properties are provisional estimates not included in JPet 1988 paper
ST 0.00 -1570700.00 74.5600 3.086 3.00000
C1 131.15910 -18.045 -4728271.000 455266700. 0.00000
V1 2.72476341 0.00029968 -0.05839748 0.00012303 0.00000000
!
***** SOLUTION DATA *****
ILM (IDEAL) M(1):Fe,Mg
ILMENITE Fe
GEIKELITE Mg
!
!========================================================================
! Garnet
!========================================================================
!
****MINERAL DATA***** from RG Berman (J.Petrology, v.29, 1988) garnet
GROSSULAR CA(3)AL(2)SI(3)O(12) Gr gGROS
ST -6270465.00 -6632859.38 255.1500 12.538 1.00000
C1 573.43042 -2039.405 -18887168.000 2319311872. 0.00000
V1 1.89942017 0.00079756 -0.06539136 0.00016350 0.00000000
PYROPE MG(3)AL(2)SI(3)O(12) Py gPYRO
ST -5938444.00 -6286547.62 266.3591 11.316 1.00000
C1 640.71997 -4542.070 -4701900.000 0. 0.00000
V1 2.25186544 0.00037044 -0.05762090 0.00004420 0.00000000
!PYR3010 SI(3)MG(3)AL(2)O(12) P3010 gPYRo
! ST 0.00 00.00 57.43315 0.000 1.00000
! C1 0.00000 0.000 00.000 0. 0.00000
!COM PYROPE[1]
ALMANDINE SI(3)FE(3)AL(2)O(12) Alm gALMA
ST 0.00 -5267216.00 340.0070 11.511 1.00000
C1 573.96191 -1483.127 -29291968.000 5022076928. 0.00000
V1 1.86125012 0.00074539 -0.05577832 0.00003211 0.00000000
SPESSARTINE SI(3)MN(3)AL(2)O(12) spf SPFA
ST 0.00 -5267216.00 340.0070 11.511 1.00000
C1 573.96191 -1483.127 -29291968.000 5022076928. 0.00000
V1 1.86125012 0.00074539 -0.05577832 0.00003211 0.00000000
! ANDRADITE SI(3)CA(3)FE(2)O(12) Andr ANDR
!! All properties are provisional estimates not included in JPet 1988 paper
! ST 0.00 -5757255.18 318.1403 13.209 3.00000
! C1 596.15930 -2530.370 -13292860.000 1395897310. 0.00000
! V1 2.13334810 0.00047020 -0.06369400 0.00022000 0.00000000
!ANDRADITE CA(3)FE(2)SI(3)O(12) Adr ANDR
! ST -5432285. -5781991.734 293.620 13.185
! C3 475.3358 0.065465 12932606.000
! V1 1.89942017 0.00079756 -0.06539136 0.00016350 0.0
!! ST, C3 from Helgeson et al. (1978)
!! V1 is grossular
!
***** SOLUTION DATA *****
GARNET (MARGULES,SITE) M(3):Ca,Mg,Fe,Mn
GROSSULAR Ca,Ca,Ca
PYROPE Mg,Mg,Mg
ALMANDINE Fe,Fe,Fe
SPESSARTINE Mn,Mn,Mn
***** MARGULES PARAMETER *****
GROSSULAR - PYROPE
112 21560. 18.79 .10
122 69200. 18.79 .10
GROSSULAR - ALMANDINE
112 20320. 5.08 .17
122 2620. 5.08 .09
PYROPE - ALMANDINE
112 230. 0.00 .01
122 3720. 0.00 .06
GROSSULAR - PYROPE - ALMANDINE
123 58825.0 23.87 0.265 0 0
GROSSULAR - PYROPE - SPESSARTINE
123 45424. 18.79 0.1
GROSSULAR - ALMANDINE - SPESSARTINE
123 11470. 5.08 0.13
PYROPE - ALMANDINE - SPESSARTINE
123 1975. 0.0 0.035
!
!========================================================================
! Feldspar
!========================================================================
!
****MINERAL DATA***** from RG Berman (J.Petrology, v.29, 1988) feldspar
ALBITE NA(1)AL(1)SI(3)O(8) Ab 2ALBI
SPC ABSAL
ST -3701276.00 -3921618.20 224.4120 10.083 1.00000
C1 393.63574 -2415.498 -7892826.000 1070636032. 0.00000
V1 2.63072032 0.00032407 -0.19446932 0.00048611 0.00000000
D1 0.00000 0.00000 0.00000 0.00000 0.00000
! Above D1 line needed to compute stable ordering relative to high albite
! using Landau-type function of Salje et al. (1985) in external ALBITE routine
!ALBITE (HIGH) NA(1)AL(1)SI(3)O(8) hAb HALB
! ST -3701276.00 -3921618.20 224.4120 10.083 1.00000
! C1 393.63574 -2415.498 -7892826.000 1070636032. 0.00000
! V1 2.63072032 0.00032407 -0.19446932 0.00048611 0.00000000
!ALBITE (LOW) NA(1)AL(1)SI(3)O(8) lAb LALB
! ST -3711054.00 -3935100.10 207.4430 10.043 1.00000
! C1 393.63574 -2415.498 -7892826.000 1070636032. 0.00000
! V1 2.63072032 0.00032407 -0.19446932 0.00048611 0.00000000
K-FELDSPAR K(1)AL(1)SI(3)O(8) Kfs KSPR
ST -3747058.00 -3970790.78 214.1451 10.869 1.00000
C1 381.37231 -1941.045 -12037252.000 1836425472. 0.00000
V1 1.51450750 0.00054850 -0.18045110 0.00051120 0.00000000
D1 282.98291 -4831.37500 3620706.00000 0.00000 0.00000
D2 -0.15733 0.00003 298.15000 1436.15000 410629.63000
!K-FELDSPAR (HIGH) K(1)AL(1)SI(3)O(8) Sa HKPR
! ST -3740412.00 -3959703.78 229.1571 10.896 1.00000
! C1 381.37231 -1941.045 -12037252.000 1836425472. 0.00000
! V1 1.51450750 0.00054850 -0.18045110 0.00051120 0.00000000
!K-FELDSPAR (LOW) K(1)AL(1)SI(3)O(8) Mcr LKPR
! ST -3747058.00 -3970790.78 214.1451 10.869 1.00000
! C1 381.37231 -1941.045 -12037252.000 1836425472. 0.00000
! V1 1.51450750 0.00054850 -0.18045110 0.00051120 0.00000000
ANORTHITE AL(2)CA(1)SI(2)O(8) An 2ANOR
ST -4002668.00 -4228730.47 200.1861 10.075 1.00000
C1 439.36938 -3734.149 0.000 -317023232. 0.00000
V1 1.09181141 0.00041985 -0.12724268 0.00031762 0.00000000
!
***** SuLUTION DATA ***** Al-avoidence external
FSP (EXT,MARGULES)
ALBITE
K-FELDSPAR
ANORTHITE
***** SOLUTION DATA ***** Al-avoidence with sites
FSP2 (SITE,MARGULES) A(1):Na,Ca,K - T1(2):Al,Si
ALBITE Na - Al,Si
K-FELDSPAR K - Al,Si
ANORTHITE Ca - Si,Si
!
***** MuRGULES PARAMETER *****
! data by Benisek et al. (2010)
ALBITE - K-FELDSPAR
122 22945.000 10.3000 0.327 0
112 17711.000 10.3000 0.461 0
ALBITE - ANORTHITE
122 40000.0000 16.4 0.069 0
112 14000.0000 4.7 -0.049 0
ANORTHITE - K-FELDSPAR
112 90600.0000 0.0 -0.257 0
122 60300.0000 0.0 -0.210 0
ALBITE - ANORTHITE - K-FELDSPAR
123 122778.00 20.85 0.1705 0
123 87300.00 93.90 -0.4670 0
!
***** MuRGULES PARAMETER *****
! data by Benisek et al. (2004)
ALBITE - K-FELDSPAR
122 19550.000 10.5000 0.327 0
112 22820.000 6.3000 0.461 0
ALBITE - ANORTHITE
122 31000.0000 4.5 0.069 0
112 9800.0000 -1.7 -0.049 0
ANORTHITE - K-FELDSPAR
112 90600.0000 29.5 -0.257 0
122 60300.0000 11.2 -0.210 0
ALBITE - ANORTHITE - K-FELDSPAR
123 125035.00 30.15 -0.2965 0
!
***** MARGULES PARAMETER *****
! data by Fuhrman and Lindsley(1988)
ALBITE - K-FELDSPAR
122 18810.000 10.3000 0.394 0
112 27320.000 10.3000 0.394 0
ALBITE - ANORTHITE
122 28226.0000 0 0 0
112 8471.0000 0 0 0
ANORTHITE - K-FELDSPAR
122 52468.0000 0 -0.120 0
112 47396.0000 0 0 0
ALBITE - ANORTHITE - K-FELDSPAR
123 100045.500 10.3 -0.76 0
!
! 123 91345.500 10.3 0.334 0
! 123 8700.000 0.0 -1.094 0
!
***** MuRGULES PARAMETER *****
! data of Ghiorso (1984)
ALBITE - POTASSIUM FELDSPAR
122 30978.336 21.5476 0 0
112 17062.352 0.0000 0 0
12 0.000 0.0000 0.3606608 0
ALBITE - ANORTHITE
122 28225.6824 0 0 0
112 8471.3448 0 0 0
ANORTHITE - POTASSIUM FELDSPAR
122 27983.0104 -20.21022624 0 0
112 67469.0920 11.062496 0 0
ALBITE - ANORTHITE - POTASSIUM FELDSPAR
123 76225.45088 8.43465112 0 0
!
!========================================================================
! Biotite
!========================================================================
!
****MINERAL DATA***** from RG Berman (J.Petrology, v.29, 1988) mica
ANNITE SI(3)FE(3)AL(1)K(1)H(2)O(12) Ann ANNI
ST 0.00 -5142000.00 421.0100 15.483 3.00000
! Properties derived by Berman (Am. Min., 1990), consistent with gt-bio expts;
! modified by McMullin (1990) on basis of SGAM barometry;
! 5142000 to be used with McMullin (1990) biotite mixing properties
!ST 0.0 -5137500.00 420.0000 15.408 3.0
! -5137500 J is value to be used with ideal FeMg mixing in garnet
!ST 0.0 -5160566.00 420.0000 15.477 3.0
! H = -5160566 J is value to be used with Gang & Sax (84) garnet model
C1 727.20800 -4775.040 -13831900.000 2119060000. 0.00000
V1 3.44473262 0.00000000 -0.16969784 0.00000000 0.00000000
MN-BIO SI(3)MN(3)AL(1)K(1)H(2)O(12) mnbi MNBI
ST 0.00 -5142000.00 421.0100 15.483 3.00000
! Diese Daten gleichen denen von Annit (von Thorsten eingefuegt)
C1 727.20800 -4775.040 -13831900.000 2119060000. 0.00000
V1 3.44473262 0.00000000 -0.16969784 0.00000000 0.00000000
PHLOGOPITE K(1)MG(3)AL(1)SI(3)O(12)H(2) Phl PHLG
ST 0.00 -6210391.00 334.3460 14.977 1.00000
C1 610.37988 -2083.781 -21533008.000 2841040896. 0.00000
V1 3.44473262 0.00000000 -0.16969784 0.00000000 0.00000000
!
***** SOLUTION DATA *****
BIOTITE (IDEAL)3 M(3):Fe,Mg,Mn
PHLOGOPITE Mg,Mg,Mg
ANNITE Fe,Fe,Fe
! MN-BIO Mn,Mn,Mn
!
!========================================================================
! White mica
!========================================================================
!
****MINERAL DATA***** from RG Berman (J.Petrology, v.29, 1988) mica
MARGARITE CA(1)AL(4)SI(2)O(12)H(2) Mrg MARG
ST -5850897.00 -6236602.96 265.0841 12.958 1.00000
C1 699.79565 -5587.105 -6807750.000 734321664. 0.00000
V1 2.10185214 0.00124556 -0.11549004 0.00028862 0.00000000
!
****MuNERAL DATA***** from RG Berman (J.Petrology, v.29, 1988)
MUSCOVITE K(1)AL(3)SI(3)O(12)H(2) Ms 1MUSC
ST -5599784.00 -5976740.12 293.1567 14.087 1.00000
C1 651.48926 -3873.229 -18523200.000 2742469376. 0.00000
V1 3.35273302 0.00000000 -0.17169021 0.00042947 0.00000000
!CELADONITE SI(4)AL(1)MG(1)K(1)O(12)H(2) cel 1
! ST 0.0 -5832415.000 288.5270 13.8700
! C3 741.200 -.01874800 -2368800.0 -6616.900
! V1 2.769296315 .000000000 -.113612157 .000000000
CELADONITE SI(4)AL(1)MG(1)K(1)O(12)H(2) cel 1
! Meyre 98 nach Massonne und Szpurka 1997 (Lithos 41, 229 ff.)
ST 0.0 -5832415.000 288.5270 13.8700
C1 645.915 -4129.540000 -13864470. 1978171000.
V1 3.352700000 .000000000 -0.17169000 .000429500
FE-CELADONITE SI(4)AL(1)FE(1)K(1)O(12)H(2) fcel 1
ST 0.0 -5492287.000 303.1480 13.9620
C1 664.755 -4553.1100 -12459890. 1871056000
V1 3.300000000 .000000000 -.170000000 .000400000
!FE-CELADONITE SI(4)AL(1)FE(1)K(1)O(12)H(2) fcel 1
! ST 0.0 -5483730.000 328.0000 14.1500
! C3 756.300 -.01914700 -1586100.0 -6928.700
! V1 2.791519435 .000000000 -.119434629 .000000000
PARAGONITE NA(1)AL(3)SI(3)O(12)H(2) Pg 1PARA
ST -5560976.00 -5944208.14 277.6991 13.216 1.00000
C1 577.56934 -1472.801 -32214368.000 5050077184. 0.00000
V1 3.94240896 0.00059701 -0.19732335 0.00049335 0.00000000
!
***** SuLUTION DATA ****** (Massonne & Szpurka 1997)
PHNG (MARGULES,IDEAL)
MUSCOVITE
CELADONITE
FE-CELADONITE
***** MuRGULES PARAMETER *****
MUSCOVITE - CELADONITE
112 0 15.92 0.187 0 1
122 0 58.598 0.735 0 1
MUSCOVITE - FE-CELADONITE
112 0 24.083 0.3394 0 1
122 0 24.083 0.3394 0 1
!
!***** SOLUTION DATA *****
!WHITE MICA (MARGULES)
! PARAGONITE
! MUSCOVITE
!***** MARGULES PARAMETER *****
!PARAGONITE - MUSCOVITE
!! data of Chatterjee and Froese (1975)
!112 19456.0184 -1.6543536 -0.456056 0
!122 12230.2504 -0.7104432 0.665256 0
!
****MINERAL DATA*****
!
! White mica by Luki Keller
!
MUSCOVITE K(1)AL(3)SI(3)O(12)H(2) Ms
ST -5599784.00 -5976740.12 293.1567 14.087 1.00000
C1 651.48926 -3873.229 -18523200.000 2742469376. 0.00000
V1 3.35273302 0.00000000 -0.17169021 0.00042947 0.00000000
PARAGONITE NA(1)AL(3)SI(3)O(12)H(2) Pg
ST -5560976.00 -5944208.14 277.6991 13.216 1.00000
C1 577.56934 -1472.801 -32214368.000 5050077184. 0.00000
V1 3.94240896 0.00059701 -0.19732335 0.00049335 0.00000000
MCELADONITE K(1)MG(1)AL(1)SI(4)O(12)H(2) MgC
ST 0.00 -5834270.00 288.527 13.870 1.00000
C1 645.915 -4129.54 -13864470.000 1978171000. 0.00000
V1 3.3527 0.00 -0.17169 0.0004295 0.0000000
FCELADONITE K(1)FE(1)AL(1)SI(4)O(12)H(2) FeC
ST 0.00 -5492287.00 303.148 13.962 1.00000
C1 664.755 -4553.11 -12459890.000 1871056000. 0.00000
V1 3.3000 0.00 -0.17000 0.0004000 0.0000000
!
***** SOLUTION DATA ***** White mica by Luki Keller
WHITE MICA (MARGULES,IDEAL) Z(4):Si,Al
MUSCOVITE Si,Si,Si,Al
PARAGONITE Si,Si,Si,Al
MCELADONITE Si,Si,Si,Si
FCELADONITE Si,Si,Si,Si
***** MARGULES PARAMETER *****
MUSCOVITE - PARAGONITE
122 15050.0 0 0.452 0 0
112 6150.0 0 0.452 0 0
MUSCOVITE - MCELADONITE
122 0.0000 58.598 0.735 0 0
112 0.0000 15.920 0.187 0 0
MUSCOVITE - FCELADONITE
112 0.0000 24.083 0.3394 0 0
122 0.0000 24.083 0.3394 0 0
MCELADONITE - PARAGONITE
112 14224 0.00 0.52 0 0
122 14224 0.00 0.52 0 0
FCELADONITE - PARAGONITE
112 16620 0.00 0.34 0 0
122 16620 0.00 0.34 0 0
MUSCOVITE - FCELADONITE - PARAGONITE
123 27220 24.083 1.13 0 0
MUSCOVITE - MCELADONITE - PARAGONITE
123 24824 37.260 1.43 0 0
MCELADONITE - PARAGONITE - FCELADONITE
123 30844 0.00 0.86 0 0
MUSCOVITE - MCELADONITE - FCELADONITE
123 0.00 61.34 0.8 0 0
!
!========================================================================
! Staurolite
!========================================================================
!
****MINERAL DATA***** from RG Berman (J.Petrology, v.29, 1988) staurolite
FE-STAUROLITE SI(7.5)FE(4)AL(18)H(4)O(48) FSt FEST
! Provisional properties not included in JPet 1988 paper; derived Nov., 1989
ST 0.00 -23765364.00 1005.3270 44.676 3.00000
C1 2577.67407 -16265.359 -61185888.000 8692047872. 0.00000
! Cp predicted with equation (11) of Berman and Brown (1985)
V1 1.79363460 0.00090396 -0.08000000 0.00000000 0.00000000
MG-STAUROLITE SI(7.5)AL(18)MG(4)O(48)H(4) MSt MGST
! ST 0.0 -25010130.000 1010.0000 44.2600
ST 0.0 -25112909.000 905.3960 44.2600
C1 2820.500 -24126.000 -13774000.0 0.000
C2 0.000 -0.05936600 0.000 0.000
V1 0.723000452 0.000000000 -0.072300045 0.000000000
! Modified MG-STAU from Holland and Powell
!
***** SOLUTION DATA ***** Nagels solution model for staurolite
STAU (MARGULES,SITE) T(4):Fe,Mg
FE-STAUROLITE Fe,Fe,Fe,Fe
MG-STAUROLITE Mg,Mg,Mg,Mg
***** MARGULES PARAMETER *****
FE-STAUROLITE - MG-STAUROLITE
21 -20000.0 0.0
!
!========================================================================
! Orthopyroxene
!========================================================================
!
****MINERAL DATA***** from RG Berman (J.Petrology, v.29, 1988) pyroxene
ORTHOENSTATITE MG(2)SI(2)O(6) En OREN
ST 0.00 -3091104.50 132.3400 6.266 1.00000
C1 333.15900 -2401.176 -4541120.000 558300672. 0.00000
V1 2.46558172 0.00074670 -0.07493458 0.00004467 0.00000000
!ORTHOENSTATITE MG(1)SI(1)O(3) En OREN
! ST -1459103.00 -1545552.25 66.1700 3.133 1.0
! C1 166.57950 -1200.588 -2270560.000 279150336. 0.0
! V1 2.46558172 0.00074670 -0.07493458 0.00004467 0.0
PROTOENSTATITE MG(1)SI(1)O(3) pEn PREN
ST -1457873.00 -1543958.64 67.4376 3.242 1.00000
C1 166.57950 -1200.588 -2270560.000 279150336. 0.00000
V1 1.68317000 0.00116650 -0.07496000 0.00004480 0.00000000
FERROSILITE SI(2)FE(2)O(6) Fsl FESI
ST 0.00 -2388749.20 191.7644 6.592 1.00000
C1 338.12116 -2385.942 -4194276.000 585065920. 0.00000
V1 3.18076456 0.00075850 -0.09899879 0.00000000 0.00000000
!FERROSILITE SI(1)FE(1)O(3) Fsl FESI
! ST -1118017.00 -1194374.61 95.8822 3.296 1.0
! C1 169.06058 -1192.971 -2097138.000 292532960. 0.0
! V1 3.18076456 0.00075850 -0.09899879 0.0 0.0
!
! Orthopyroxene data by Philipp Hunziker
!
MG.AL-PYROXENE MG(1)AL(2)SI(1)O(6) MgTs
ST 0.00 -3186328.63 129.940000 5.88800
C1 330.418 -2166.493 -6251535.000 715160880.00
V1 2.46558172 0.00074670 -0.07493458 0.00004467 0.00000000
MG.FE-PYROXENE SI(2)FE(1)MG(1)O(6) femg 1
ST 0.00 -2745997.2500 163.8100 6.429 1.00000
C1 335.64008 -2393.559 -4367698.000 571683296. 0.00000
V1 2.82317314 0.00075260 -0.08696670 0.00000000 0.00000000
FE.MG-PYROXENE SI(2)MG(1)FE(1)O(6) mgfe 1
ST 0.00 -2717321.6540 173.9300 6.429 1.00000
C1 335.64008 -2393.559 -4367698.000 571683296. 0.00000
V1 2.82317314 0.00075260 -0.08696670 0.00000000 0.00000000
FE.AL-PYROXENE FE(1)AL(2)SI(1)O(6) FeTs
ST 0.00 -2824362.94 174.563000 6.41800
C1 332.899 -2158.876 -6078113. 728543504.
V1 3.18076456 0.00075850 -0.09899879 0.00000000 0.00000000
!
***** SOLUTION DATA ***** Solution model for Opx (Hunziker)
OPX (IDEAL) M1(1):Mg,Fe - M2(1):Mg,Fe,Al
ORTHOENSTATITE Mg - Mg
FERROSILITE Fe - Fe
MG.FE-PYROXENE Mg - Fe
FE.MG-PYROXENE Fe - Mg
MG.AL-PYROXENE Mg - Al
FE.AL-PYROXENE Fe - Al
!
!========================================================================
! Clinopyroxene
!========================================================================
!
****MINERAL DATA*****
!CLINOENSTATITE MG(1)SI(1)O(3) cEn CLEN
! ST -1458699.00 -1545926.25 66.3251 3.131 1.00000
! C1 139.95824 -497.034 -4400237.000 535708928. 0.00000
! V1 2.19150000 0.00074920 -0.07496000 0.00004480 0.00000000
DIOPSIDE MG(1)CA(1)SI(2)O(6) Di DIOP
ST -3027516.00 -3200583.50 142.5000 6.620 1.00000
C1 305.41333 -1604.931 -7165973.000 921837568. 0.00000
V1 2.77951964 0.00083082 -0.08724773 0.00017069 0.00000000
JADEITE NA(1)AL(1)SI(2)O(6) Jd JADE
ST -2845291.00 -3025118.24 133.5739 6.034 1.00000
C1 311.29297 -2005.101 -5350264.000 662566912. 0.00000
V1 2.31184298 0.00025785 -0.08598017 0.00021488 0.00000000
HEDENBERGITE CA(1)FE(1)SI(2)O(6) Hd HEDE
! All properties are provisional estimates not included in JPet 1988 paper
ST 0.00 -2837144.22 174.3314 6.795 3.00000
C1 296.70260 -1239.150 -7416518.000 893501213. 0.00000
V1 2.37026500 0.00050310 -0.07900000 0.00003923 0.00000000
!HEDENBERGITE CA(1)FE(1)SI(2)O(6) Hed HED
! ST -2676278. -2840727.053 170.403 6.827
! C3 229.4785 0.034206 6284386.800
! V1 2.77951964 0.00083082 -0.08724773 0.00017069 0.0
!! ST, C3 from Helgeson et al. (1978)
!! V1 is diopside
CA-AL PYROXENE CA(1)AL(2)SI(1)O(6) CTs CATS
ST -3120980.00 -3298766.68 140.7508 6.356 1.00000
C1 310.69775 -1671.627 -7455263.000 948781568. 0.00000
V1 2.22504720 0.00052863 -0.08700441 0.00021712 0.00000000
!
***** SOLUTION DATA ***** Omphacite, Meyre et al. ()
OMPH (MARGULES,IDEAL)
DIOPSIDE
JADEITE
HEDENBERGITE
***** MARGULES PARAMETER ******
JADEITE - DIOPSIDE
112 25587.5749 15.9243 0.0000 0.0000 1.0000
122 5920.2458 10.7164 0.0000 0.0000 1.0000
DIOPSIDE - HEDENBERGITE
112 31448.6254 28.8272 0.0000 0.0000 1.0000
122 -65167.1449 -45.4535 0.0000 0.0000 1.0000
JADEITE - HEDENBERGITE
112 3670 9 0 0 1
122 15090 8 0 0 1
! Jd-Hd from Massonne (1992)
!
!========================================================================
! Testing P2/n
!========================================================================
!
****MuNERAL DATA*****
AA MG(1)CA(1)SI(2)O(6) aa aaj
ST 0.00 0.00 0.000 0.0000
C1 0.00000 0.0000 0.000 0.
BB NA(1)AL(1)SI(2)O(6) bb bbj
ST 0.00 0.00 0.000 0.0000
C1 0.00000 0.0000 0.000 0.
***** SuLUTION DATA *****
P2/n (EXT)
AA
BB
***** SaLUTION DATA *****
CPX (SKIP,MARGULES)
CLINOENSTATITE
DIOPSIDE
***** MuRGULES PARAMETER *****
CLINOENSTATITE - DIOPSIDE
112 31216.0 0 -0.0061 0 0
122 25484.0 0 0.0812 0 0
!
!========================================================================
! Chlorite
!========================================================================
!
****MINERAL DATA***** from RG Berman (J.Petrology, v.29, 1988) with
!CLINOCHLORE MG(5)AL(2)SI(3)O(18)H(8) Chl CLIN
! ST -8259134.00 -8909589.84 435.1545 21.147 2.00000
! C1 1214.28442 -11217.129 0.000 -1256253184. 0.00000
! V1 2.64515406 0.00000000 -0.18194707 0.00000000 0.00000000
! MN-CHLOR SI(3)AL(2)MN(5)O(18)H(8) mnch 3
! !from tcds
! ST 0.0 -7149480.000 559.0000 21.3400
! C3 1237.400 .01359400 -3743000.0 -11250.000
! V1 2.764761012 .000000000 -.178069353 .000000000
!
! chlorite data by Philipp Hunziker
!
AMESITE MG(4)AL(4)SI(2)O(18)H(8) Ame 1
ST 0.00 -9022957.58 403.470000 20.52000
C1 1144.45 -8327.2 -20058040. 2820786000.
V1 2.64515406 0.00000000 -0.18194707 0.00000000
PENNINITE MG(5.5)AL(1)SI(3.5)O(18)H(8) Pen 1
ST 0.00 -8822346.74 437.800000 21.37000
C1 1130.32650 -8044.360 -18920800.00 2575230000.00
V1 2.64515406 0.0 -0.18194707 0.0 0.0
FEAMESITE FE(4)AL(4)SI(2)O(18)H(8) FeAm 1
ST 0.00 -7611289.00 505.000000 20.75800
C1 1219.81 -10021.5 -14439720. 2392326000.0
V1 2.64515406 0.0 -0.18194707 0.0
FEPENNINITE FE(5.5)AL(1)SI(3.5)O(18)H(8) FeP 1
ST 00000000.00 -6862527.00 603.8400 21.700
! ST 00000000.00 -6864527.00 603.8400 21.700
C1 1233.9465 -10373.995 -11195610.00 1986097500.00
V1 2.64515406 0.0 -0.18194707 0.0
!
***** SOLUTION DATA ***** Chlorite solution model.
CHL4 (IDEAL)4 T5(4):AL,SI
AMESITE AL,AL,AL,AL
PENNINITE AL,SI,SI,SI
FEAMESITE AL,AL,AL,AL
FEPENNINITE AL,SI,SI,SI
!
!========================================================================
! Cordierite
!========================================================================
!
****MINERAL DATA***** from RG Berman (J.Petrology, v.29, 1988) cordierite
CORDIERITE MG(2)AL(4)SI(5)O(18) Cd CORD
ST -8652708.00 -9158726.56 417.9700 23.311 2.00000
C1 954.38650 -7962.274 -2317258.000 -370214090. 0.00000
V1 0.30028742 0.00018017 -0.11582515 0.00000000 0.00000000
!
HY_CORDIERITE MG(2)AL(4)SI(5)O(18)H(4)O(2) hCd CORD
ST 0.00 -563493.80 156.6650 2.3060 2.00000
C1 270.73860 -9633.768 -8152144.000 0. 0.00000
C2 133752.00 -0.009046 0.000 0. 0.00000
COM CORDIERITE[1]
!
!
FE_CORDIERITE FE(2)AL(4)SI(5)O(18) fCd FECD
! Provisional properties not included in JPet 1988 paper; derived Nov., 1989
ST 0.00 -8469858.00 453.0550 23.707 3.00000
C1 975.30000 -8013.440 -9618520.000 1189278000. 0.00000
V1 1.26000000 0.00000000 -0.11582515 0.00000000 0.00000000
HY_Fe_CORDIERITE FE(2)AL(4)SI(5)O(18)H(4)O(2) hfCd CORD
ST 0.00 -563493.80 156.6650 2.3060 2.00000
C1 270.73860 -9633.768 -8152144.000 0. 0.00000
C2 133752.00 -0.009046 0.000 0. 0.00000
COM FE_CORDIERITE[1]
!
***** SOLUTION DATA *****
CORD (IDEAL)2
CORDIERITE
HY_CORDIERITE
FE_CORDIERITE
HY_Fe_CORDIERITE
!
!========================================================================
! Chloritoid
!========================================================================
!
****MuNERAL DATA***** from RG Berman (J.Petrology, v.29, 1988) chloritoide
MGCTD SI(1.00)AL(2.00)MG(1.00)O(7.00)H(2.00) mctd 1
! ST 0.0 -3559510.000 132.0000 6.8750
ST 0.0 -3559750.000 132.3330 6.8730
C1 464.400 -4341.000 -1147200.0 0.000
C2 0.000 -0.01265400 0.000 0.000
V1 3.098181818 0.000000000 -0.066036364 0.000000000
! Adopted from tcds!Changes by Ronan le Bayon
FECTD SI(1.00)AL(2.00)FE(1.00)O(7.00)H(2.00) fctd 1
!ST 0.0 -3210040.000 162.0000 6.9800
ST 0.0 -3210522.000 161.6490 6.9787
C1 484.600 -4762.200 -198900.0 0.000
C2 0.000 -0.01380800 0.000 0.000
V1 3.094555874 0.000000000 -0.068767908 0.000000000
! Adopted from tcds!Changes by Ronan le Bayon!!!
!
***** SuLUTION DATA *****
CTD (IDEAL) M(1):Fe,Mg
FECTD Fe
MGCTD Mg
!
****MINERAL DATA***** from RG Berman (J.Petrology, v.29, 1988) chloritoide
MG-CHLORITOID MG(1)AL(2)SI(1)O(7)H(2) mctd 1
! all data from Vidal et al., 2001
ST 00000000.00 -3557301.00 132.0000 6.864
C1 399.52000 -2538.500 -6361600.00 489510000.0
V1 3.00000000 0.00000000 -0.067567600 0.00000000
FE-CHLORITOID FE(1)AL(2)SI(1)O(7)H(2) fctd 1
!Data by Vidal et al., 1999
ST 00000000.00 -3211200.00 162.0000 6.967
C1 444.36900 -3880.207 -4869293.00 916326240.0
V1 3.00000000 0.00000000 -0.06756760 0.00000000
!
***** SOLUTION DATA *****
CTOID (IDEAL) M(1):Fe,Mg
FE-CHLORITOID Fe
MG-CHLORITOID Mg
!
!========================================================================
! Epidote, Zoisite
!========================================================================
!
****MINERAL DATA***** from RG Berman (J.Petrology, v.29, 1988) epidote
ZOISITE CA(2)AL(3)SI(3)O(13)H(1) Zo ZOIS
ST -6494050.00 -6889488.28 297.5759 13.588 1.00000
C1 749.17041 -6509.281 -2380525.000 124858368. 0.00000
V1 3.46695614 0.00000000 -0.05151604 0.00012879 0.00000000
CLINOZOISITE CA(2)AL(3)SI(3)O(13)H(1) cZo CLZO
ST -6495977.00 -6894967.74 287.0759 13.673 3.00000
C1 749.17037 -6509.283 -2380525.000 124858370. 0.00000
V1 3.46695614 0.00000000 -0.05151604 0.00012879 0.00000000
!EPIDOTE SI(3)AL(2)FE(1)CA(2)O(13)H(1) ep EP aus HollandPowell90 !!!!!
! ST 0.0 -6472240.000 315.0000 13.9200
! C3 697.900 -.00999300 -5105300.0 -4710.100
! V1 2.514367816 .000000000 -.057471264 .000000000
!
! HollandPowell tcdb55:
! fit to reproduce reaction 2 czo + hem + q = 2 ep + ky
!EPIDOTE SI(3)AL(2)FE(1)CA(2)O(13)H(1) ep 2nh
! ST 0.0 -6463210.000 328.0000 13.9100
! C3 544.60000 0.0247810 -11230000.0 -1192.100 0.00
! VHP 0.000050500 1233.0 0.0000 0.00 0.00000
! VH2 10.0000 4.0000 -0.000184950
EPIDOTE SI(3)AL(2)FE(1)CA(2)O(13)H(1) ep 2
ST 0.0 -6451210.000 328.0000 13.9000
C3 697.900 -.00999300 -5105300.0 -4710.100
V1 2.514367816 .000000000 -.057471264 .000000000
!
***** SuLUTION DATA *****
EPID (IDEAL)
CLINOZOISITE
EPIDOTE
!
!========================================================================
! Carbonates
!========================================================================
!
****MINERAL DATA***** from RG Berman (J.Petrology, v.29, 1988) carbonates
CALCITE CA(1)C(1)O(3) Cc CALC
ST -1128813.00 -1206819.09 91.7248 3.690 1.00000
C1 178.18748 -1657.697 -482722.000 166604928. 0.00000
V1 0.89068166 0.00227402 -0.14001897 0.00000000 0.00000000
DOLOMITE MG(1)CA(1)C(2)O(6) Do DOLO
ST -2163760.00 -2325248.43 154.8900 6.432 1.00000
C1 328.48267 -2554.425 -4688477.000 790382336. 0.00000
V1 1.42302371 0.00363778 -0.10701904 0.00000000 0.00000000
D1 -9.42300 -2.27260 385300.00000 0.00000 0.00000
D2 0.01732 0.00001 298.15000 1423.00000 0.00000
MAGNESITE MG(1)C(1)O(3) Mst MGCO
ST -1029123.00 -1114505.11 65.0900 2.803 2.00000
C1 162.29663 -1109.267 -4882646.000 874661888. 0.00000
V1 1.84361600 0.00415968 -0.08900860 0.00022118 0.00000000
RHODOCHROSITE MN(1)C(1)O(3) Rhc CN
ST 0.000 -891910.000 98.030000 3.1074000
C1 190.623300 -1985.15000 0.00000 155967300.0
!
!========================================================================
! Amphiboles
!========================================================================
!
****MINERAL DATA***** from RG Berman (J.Petrology, v.29, 1988) amphiboles
ANTHOPHYLLITE MG(7)SI(8)O(24)H(2) Ath ANTH
ST -11348827.00 -12069031.71 535.1955 26.560 2.00000
C1 1219.31348 -5766.535 -34766144.000 4400898048. 0.00000
V1 2.70597176 0.00031325 -0.12590060 0.00000000 0.00000000
TREMOLITE CA(2)MG(5)SI(8)O(24)H(2) Tr TREM
ST -11584267.00 -12305578.13 551.1499 27.268 2.00000
C1 1229.36007 -6401.900 -32089890.000 4208807760. 0.00000
V1 2.43738877 0.00098338 -0.13917727 0.00034809 0.00000000
FETREMOLITE CA(2)FE(5)SI(8)O(24)H(2) FeTr FETR
ST -11584267.00 -10484278.30 725.0000 28.370 0.00000
C1 1323.56200 -8519.785 -25067000.000 3673229000. 0.00000
V1 2.43738877 0.00098338 -0.13917727 0.00034809 0.00000000
TSCHERMAKITE CA(2)MG(3)AL(4)SI(6)O(24)H(2) Tsc TSCH
ST -11584267.00 -12574757.50 517.7058 26.921 0.00000
C1 1248.18700 -6779.026 -33606240.000 4536217000. 0.00000
V1 2.43738877 0.00098338 -0.13917727 0.00034809 0.00000000
!FETSCHERMAKITE CA(2)FE(3)AL(4)SI(6)O(24)H(2) FeTs FETS
! ST -11584267.00 -11491198.20 634.6937 27.190 0.00000
! C1 1304.70800 -8049.757 -29392510.000 4214870000. 0.00000
! V1 2.43738877 0.00098338 -0.13917727 0.00034809 0.00000000
PARGASITE NA(1)CA(2)MG(4)AL(3)SI(6)O(24)H(2) Parg PARG
ST 0.00 -12726682.30 589.2005 27.090 0.00000
C1 1276.26200 -6514.016 -35217190.000 4745671000. 0.00000
V1 3.08710000 0.00000000 -0.11025400 0.00000000 0.00000000
FEPARGASITE NA(1)CA(2)FE(4)AL(3)SI(6)O(24)H(2) FePa FEPA
ST 0.00 -11271593.70 738.0000 27.860 0.00000
C1 1351.62300 -8208.323 -29598880.000 4317209000. 0.00000
V1 3.08710000 0.00000000 -0.11025400 0.00000000 0.00000000
GLAUCOPHANE NA(2)AL(2)MG(3)SI(8)O(24)H(2) Glc GLAU
! from Evans (1990, Lithos)
ST 0.00 -11959000.00 535.0000 26.050 3.00000
!ST 0.00 -11960500.00 535.0000 26.050 3.00000
C1 1717.50000 -19272.000 7050000.000 0. 0.00000
C2 0.00 -0.121070 0.00000000 0.000 0.00000
V1 2.20000000 0.00088000 -0.11600000 0.00029000 0.00000000
!GLAUCOPHANE NA(2)MG(3)AL(2)SI(8)O(24)H(2) Gl GLPH
! data from Aley El-Shazly (1989)
!ST -11224234.0 -11958865.00 535.000 26.050
!C1 1717.50000 -19272.000 7075000.000 0.0 0.0
!C2 0.00000 -0.1210700 0.000 0.0
!V1 2.71035000 -0.00015000 -0.10959000 0.00000000 0.0
!GLAUCOPHANE NA(2)MG(3)AL(2)SI(8)O(24)H(2) Gl GLPH
! data from Holland (1988), S from Robie et al. (1991)
!ST 0.0 -11964300.00 541.200 26.040
!C1 1717.50000 -19272.000 7075000.000 0.0
!C2 0.00000 -0.1210700 0.000 0.0
!V1 2.70000000 0.00000000 -0.11000000 0.00000000
!BARROISIT CA(1)NA(1)AL(3)MG(3)SI(7)O(24)H(2) Bar 8
! ST 0.000 -5000.000 00.00000000 0.000000
! C1 0.000000 000.00000 000000.00 0.0
!COM GLAUCOPHANE[0.5]TSCHERMAKITE[0.5]
!
**** SOLUTION DATA ****
AMPHx (IDEAL,MARGULES)1.7 A(1):v,Na - M1(2):Mg,Al
TREMOLITE v - Mg,Mg
TSCHERMAKITE v - Al,Al
PARGASITE Na - Mg,Al
***** MARGULES PARAMETER *****
TREMOLITE - TSCHERMAKITE
12 21431.0 0 0
TREMOLITE - PARGASITE
12 20459.5 0 0
TSCHERMAKITE - PARGASITE
12 20459.5 0 0
!
!========================================================================
! Gas-data and buffers
!========================================================================
!
****GASES***** gases
CARBON DIOXIDE C(1)O(2) CO2 CARB
ST -394342.00 -393510.01 213.6770 0.000 1.00000
C1 93.00000 -1340.900 123800.000 0. 0.00000
C2 6336.20 -0.002876 0.00000000 0.000 0.00000
WATER H(2)O(1) W WATR
ST -228538.00 -241816.00 188.7200 0.000 1.00000
C1 115.45000 -3799.900 -2871300.000 0. 0.00000
C2 51055.16 -0.002062 0.00000000 0.000 0.00000
! THE PROPERTIES OF WATER GIVEN HERE ARE FOR STEAM
! IF THE HAAR EQUATION OF STATE IS USED, THEY ARE (MUST BE)
! ZERO'ED OUT BY THE PROGRAM
OXYGEN GAS O(2) O2 O2
ST 0.00 0.00 205.0330 0.000 1.00000
C1 23.10248 804.888 1762835.000 0. 0.00000
C2 -18172.92 0.003000 0.00000000 0.000 0.00000
SULFUR GAS S(2) S2 S2
ST 0.00 128365.00 228.0700 0.000 1.00000
C3 36.48 0.000669 -376560.00 0.000 0.00000
HYDROGEN GAS H(2) H2 H2
ST 0.00 0.00 130.5740 0.000 1.00000
C3 27.28 0.003263 -50208.00 0.000 0.00000
! CP1 52.783450 -1479.35790 -1996386.00 0.0
! CP2 24980.4325 0.001270000 0.0000000E+00 0.0000000E+00 0.0000000E+00
!
***** GAS DATA *****
CARBON-DIOXIDE C(1)O(2) CO2 1mNw 8wNK
SPC CK&J
ST -394342.00 -393510.01 213.6770 0.000 1.00000
R-K 8.05163300E+07-4.98237200E+04 2.72086300E+01 3.06906900E-03
C1 93.00000 -1340.900 123800.000 0. 0.00000
C2 6336.20 -0.002876 0.00000000 0.000 0.00000
!CARBON.DIOXIDE C(1)O(2) CO2 8wNK
! SPC CK&J
! ST 0.000 -393510.000 213.637000 0.000000
! R-K 8.05163300E+07-4.98237200E+04 2.72086300E+01 3.06906900E-03
! C1 81.619700 -710.47700 972938.00 0.0
! C2 -4103.8300 -0.001761000 0.0000000E+00 0.0000000E+00 0.0000000E+00
!
!water.fluid O(1)H(2) H2O 1nh
! SPC HHP98
! ST 0.0 -241810.000 188.8000 0.0000
! C3 40.10000 0.0086560 487500.0 -251.200 0.00
! VHP 0.000000000 0.0 0.0000 0.00 0.00000
! VH2 0.0000 0.0000 0.000000000
STEAM H(2)O(1) H2O z38wsNK
SPC HAAR
!SPC WK&J
ST -228538.00 -241816.00 188.7200 0.000 1.00000
R-K 1.27918600E+08-2.24141500E+04 1.42806200E+01 6.09223700E-04
C1 115.45000 -3799.900 -2871300.000 0. 0.00000
C2 51055.16 -0.002062 0.00000000 0.000 0.00000
!STEAMID H(2)O(1) H2O.i m38wsNK
! ST -228538.00 -241816.00 188.7200 0.000 1.00000
! VDW 0.00000000E+00 0.00000000E+00 0.00000000E+00 0.00000000E+00
! C1 115.45000 -3799.900 -2871300.000 0. 0.00000
! C2 51055.16 -0.002062 0.00000000 0.000 0.00000
!STEAM2 H(2)O(1) H2O 8wNK
! SPC HAAR
! ST 0.000 -241816.000 188.695000 0.000000
! R-K 1.27918600E+08-2.24141500E+04 1.42806200E+01 6.09223700E-04
! C1 135.369290 -4816.88400 -4076072.00 0.0
! C2 66876.1490 -0.004523000 0.0000000E+00 0.0000000E+00 0.0000000E+00
!
OXYGEN O(2) O2 BN
ST 0.00 0.00 205.0330 0.000 1.00000
R-K 1.73888400E+07 0.00000000E+00 2.20990000E+01 0.00000000E+00
C1 23.10248 804.888 1762835.000 0. 0.00000
C2 -18172.92 0.003000 0.00000000 0.000 0.00000
!--- S0 : -R*ln(a)
!--- e.g. a=0.2 -> S0=13.38134963
!Oxy-Buffer O(2) oxy zBN
! ST 0.000 0.00000 0.00000000 0.000000
! C1 0.000000 0.00000 0.00 0.0
!COM OXYGEN[1] 1d-35
!-Oxy-Buffer O(-2) -oxy zBN
! ST 0.000 0.00000 00.00000000 0.000000
! C1 0.000000 0.00000 0.00 0.0
!COM Oxy-Buffer[-1]
!
HYDROGEN H(2) H2 BN
ST 0.000 0.000 130.574000 0.000000
R-K 1.45822000E+06 0.00000000E+00 1.85024000E+01 0.00000000E+00
C1 52.783450 -1479.35790 -1996386.00 0.0
C2 24980.4325 0.001270000 0.0000000E+00 0.0000000E+00 0.0000000E+00
HHM-BUFFER H(2) HHM *HHM
ST 0.000 000000.000 000.000000 0.000000
CP1 0.000000 0.00000 0.00 0.0
COM MAGNETITE[2] STEAM[1] HEMATITE[-3] 0 HEMATITE
#NAME?
ST 0.000 000000.000 000.000000 0.000000
CP1 0.000000 0.00000 0.00 0.0
COM HHM-BUFFER[-1]
!OHM-BUFFER O(2) OHM *OHM
! ST 0.000 000000.000 000.000000 0.000000
! CP1 0.000000 0.00000 0.00 0.0
! COM HEMATITE[6]MAGNETITE[-4] 0 HEMATITE
!-OHM-BUFFER O(-2) -OHM *OHM
! ST 0.000 000000.000 000.000000 0.000000
! CP1 0.000000 0.00000 0.00 0.0
! COM OHM-BUFFER[-1]
!QFM-BUFFER O(2) QFM *QFM
! ST 0.000 000000.000 000.000000 0.000000
! CP1 0.000000 0.00000 0.00 0.0
! COM MAGNETITE[2] A-QUARTZ[3] FAYALITE[-3] 0 MAGNETITE
#NAME?
ST 0.000 000000.000 000.000000 0.000000
CP1 0.000000 0.00000 0.00 0.0
COM QFM-BUFFER[-1]
!CARBON MONOXIDE C(1) O(1) CO RN
! ST 0.000 -110530.000 197.670000 0.000000
! VDW 0.00000000E+00 0.00000000E+00 0.00000000E+00 0.00000000E+00
! CP1 45.730000 414.69000 662700.00 0.0
! CP2 0.0000 -0.000097115 0.0000000E+00 0.0000000E+00 0.0000000E+00
!BP-BUFFER H(2)O(1) BP *BP
! ST 0.000 000000.000 000.000000 0.000000
! CP1 0.000000 0.00000 0.00 0.0
! COM BRUCITE[1] PERICLASE[-1]
!-BP-BUFFER H(-2)O(-1) -BP *BP
! ST 0.000 000000.000 000.000000 0.000000
! CP1 0.000000 0.00000 0.00 0.0
! COM BP-BUFFER[-1]
! SULFUR GAS S(2) S2 S2
! ST 0.00 128365.00 228.0700 0.000 1.00000
! C3 36.48 0.000669 -376560.00 0.000 0.00000
!
***** SOLUTION DATA *****
H2O-CO2 (IDEAL)
STEAM
CARBON-DIOXIDE
***** SaLUTION DATA *****
H2O-CO2 (EXT)
STEAM
CARBON-DIOXIDE
!***** MuRGULES PARAMETER *****
!STEAM - CARBON DIOXIDE
!112 15000.000 0.00000 0 0 0.0
!122 15000.000 0.00000 0 0 0.0
!
!
!========================================================================
! special data (usually not used)
!========================================================================
!
***** GuS DATA *****
Co0.x AL(2)O(3) Cox Co8
ST 0.000 000000.000 000.000000 0.000000
CP1 0.000000 0.00000 0.00 0.0
COM CORUNDUM[1] 1D1
-Co0.x AL(-2)O(-3) -Cox Co8
ST 0.000 000000.000 000.000000 0.000000
CP1 0.000000 0.00000 0.00 0.0
COM Co0.x[-1]
Qz0.x SI(1)O(2) Qzx zAQTZ
ST 0.000 000000.000 000.000000 0.000000
CP1 0.000000 0.00000 0.00 0.0
COM A-QUARTZ[1] 1D-5
-Qz0.x SI(-1)O(-2) -Qzx zAQTZ
ST 0.000 000000.000 000.000000 0.000000
CP1 0.000000 0.00000 0.00 0.0
COM Qz0.x[-1]
!
****MuNERAL DATA***** NNO buffer
nickel NI(1) Ni +nh
ST 0.0 0.000 29.8700 0.6588
C3 49.80000 0.0000000 585900.0 -533.900 0.00
VHP 0.000088600 1870.0 631.0000 3.00 0.00000
VH2 10.0000 4.0000 -0.000280500
nickel-oxide O(1)NI(1) NiO +nh
ST 0.0 -239440.000 38.0000 1.0970
C3 47.70000 0.0078240 -392500.0 0.000 0.00
VHP 0.000062000 1650.0 520.0000 5.70 0.00000
VH2 10.0000 4.0000 -0.000247500
NNO-Buffer O(2) *NNO zBN
ST 0.000 0.00000 0.00000000 0.000000
C1 0.000000 0.00000 0.00 0.0
COM nickel-oxide[2]nickel[-2] 0 nickel
#NAME?
ST 0.000 0.00000 0.00000000 0.000000
C1 0.000000 0.00000 0.00 0.0
COM NNO-Buffer[1]
!
****MuNERAL DATA***** additions by Capi etc.
MANGANOSITE MN(1)O(1) MnO CN
ST 0.000 -384590.920 59.578620 1.3221000
C1 66.323800 -278.27000 0.00000 -35666330.0
PYROXMANGITE MN(1)SI(1)O(3) Pxm CN
!ST 0.000 -1320794.870 100.280700 3.4714000
ST 0.000 -1178372.450 286.840050 3.4714000
C1 156.142700 -902.62000 -2765238.00 369785700.0
!
****MuNERAL DATA***** additions by Capi etc.
RUTILE.R TI(1)O(2) rut RA
ST 0.00 -944750.000 50.290 1.8820
C1 0.0000 -5.616000 0.0000000000 0.00000
C3 63.0790 0.0113070 -986260.000
ANATASE.R TI(1)O(2) anar RA
ST 0.00 -938720.000 49.910 2.0520
C1 0.0000 629.370000 0.0000000000 0.00000
C3 43.9610 0.0137380 -2595300.000
ANATASE.C TI(1)O(2) anac NRA
ST 0.00 -943566.347 49.910 2.0520
C1 0.0000 629.370000 0.0000000000 0.00000
C3 43.9610 0.0137380 -2595300.000
GRAPHITE C(1) C RN
ST 0.000 0.000 5.740000 0.5298000
CP1 16.861500 0.00000 -853536.00 0.0
CP2 0.0000 0.004769800 0.0000000E+00 0.0000000E+00 0.0000000E+00
!
!========================================================================
! salt
!========================================================================
!
****MuNERAL DATA***** additions by Capi etc.
!portlandite CA(1)O(2)H(2) pld r Robie et al.
! ST 0.0 -986085.000 83.3900 3.3056
! C3 186.670 -.00219110 00.0 -1599.800
HALITE NA(1)CL(1) Hal ROBIE
ST -374837.000 -413461.000 87.22000 2.7015 1.00000
C3 45.151000 0.0179740 0.000 0. 0.00000
!SYLVITE K(1)CL(1) Syl ROBIE
! ST -408554.000 -436470.000 82.59000 3.7524 1.00000
! C3 -24.516000 0.0485220 -1605400.0 1371.00000 0.00000
!
!***** SOLUTION DATA *****
!SALT (IDEAL,MARGULES)
! HALITE
! SYLVITE
!***** MARGULES PARAMETER *****
!HALITE - SYLVITE
!112 37618.344 30.45950 0 0 0.0
!122 24212.808 21.12920 0 0 0.0
!
!========================================================================
! aqueous species
!========================================================================
!
****MUNERAL DATA***** additions of aqueous species
Al(OH)+2 AL(1)O(1)H(1)E(2)
ST -166468.000 -185096.0000 -46.8200 0.0
AQ1 38.00000 -26000.00 2.00000 2.33512
AQ2 0.025800 -969.650 9.60000 -25767.000
Al(OH)2+ AL(1)O(2)H(2)E(1)
ST -215465.000 -241825.0000 -17.0000 0.0
AQ1 46.70000 -15000.00 1.00000 1.23202
AQ2 0.350000 -246.000 6.30000 -28100.000
Al+3 AL(1)E(3)
ST -116543.000 -128681.0000 -80.8000 0.0
AQ1 10.70000 -80600.00 3.00000 3.33001
AQ2 -0.334040 -1711.080 14.99170 -20716.000
AlO2- AL(1)O(2)E(-1)
ST -198700.000 -222079.0000 -7.0000 0.0
AQ1 19.10000 -62000.00 -1.00000 1.35998
AQ2 0.372800 398.000 -1.51700 -29435.000
CO2,aq C(1)O(2)E(0)
ST -92250.000 -98900.0000 28.1000 0.0
AQ1 40.03250 88004.00 0.00000 -2000.00000
AQ2 0.624660 747.110 2.81360 -30879.000
CO3-2 C(1)O(3)E(-2)
ST -126191.000 -161385.0000 -11.9500 0.0
AQ1 -3.32060 -171917.00 -2.00000 2.86995
AQ2 0.285240 -398.440 6.41420 -26143.000
Ca(CO3),aq CA(1)C(1)O(3)E(0)
ST -262850.000 -287390.0000 2.5000 0.0
AQ1 -9.95100 -85406.00 0.00000 -3000.00000
AQ2 -0.024300 -837.480 9.04170 -24328.000
Ca(HCO3)+ CA(1)H(1)C(1)O(3)E(1)
ST -273830.000 -294350.0000 16.0000 0.0
AQ1 42.35450 85559.00 1.00000 1.95995
AQ2 0.319110 1.040 5.74590 -27794.000
Ca+2 CA(1)E(2)
ST -132120.000 -129800.0000 -13.5000 0.0
AQ1 9.00000 -25220.00 2.00000 2.86996
AQ2 -0.019470 -725.200 5.29660 -24792.000
CaCl+ CA(1)CL(1)E(1)
ST -162550.000 -169250.0000 -1.5000 0.0
AQ1 23.66520 12044.00 1.00000 1.48997
AQ2 0.266700 -126.940 6.24890 -27265.000
CaCl2,aq CA(1)CL(2)E(0)
ST -194000.000 -211060.0000 6.0000 0.0
AQ1 26.63090 41743.00 0.00000 -3000.00000
AQ2 0.611870 715.880 2.93630 -30749.000
CaF+ CA(1)F(1)E(1)
ST -200390.000 -208600.0000 -9.0000 0.0
AQ1 30.11570 30764.00 1.00000 1.35003
AQ2 0.098460 -537.730 7.86350 -25567.000
CaSO4,aq CA(1)S(1)O(4)E(0)
ST -312930.000 -345900.0000 5.0000 0.0
AQ1 -8.49410 -81271.00 0.00000 -100.00000
AQ2 0.279100 -96.660 6.13000 -27390.000
Cl- CL(1)E(-1)
ST -31379.000 -39933.0000 13.5600 0.0
AQ1 -4.40000 -57140.00 -1.00000 1.80995
AQ2 0.403200 480.100 5.56300 -28470.000
ClO- CL(1)O(1)E(-1)
ST -8800.000 -25600.0000 10.0000 0.0
AQ1 -9.06300 -130566.00 -1.00000 1.77001
AQ2 0.363250 108.810 5.32240 -28240.000
ClO2- CL(1)O(2)E(-1)
ST 4100.000 -15900.0000 24.2000 0.0
AQ1 -0.06590 -92474.00 -1.00000 2.29002
AQ2 0.550360 565.690 3.52660 -30129.000
ClO3- CL(1)O(3)E(-1)
ST -1900.000 -24850.0000 38.8000 0.0
AQ1 8.55610 -55401.00 -1.00000 3.30007
AQ2 0.716650 971.720 1.93070 -31807.000
ClO4- CL(1)O(4)E(-1)
ST -2040.000 -30910.0000 43.5000 0.0
AQ1 22.30000 -89000.00 -1.00000 3.85034
AQ2 0.814110 1730.590 -12.22540 -34944.000
Fe(CH3COO)+ FE(1)C(2)H(3)O(2)E(1)
ST -111900.000 -139060.0000 -1.5000 0.0
AQ1 59.05750 135058.00 1.00000 1.48997
AQ2 0.393140 181.800 5.03550 -28542.000
Fe(CH3COO)2,aq FE(1)C(4)H(6)O(4)E(0)
ST -201800.000 -259100.0000 11.5300 0.0
AQ1 113.84280 344869.00 0.00000 -3000.00000
AQ2 1.095050 1895.680 -1.70080 -35627.000
Fe+2 FE(1)E(2)
ST -21870.000 -22050.0000 -25.3000 0.0
AQ1 14.96320 -46438.00 2.00000 2.61996
AQ2 -0.078030 -968.670 9.55730 -23786.000
Fe+3 FE(1)E(3)
ST -4120.000 -11850.0000 -66.3000 0.0
AQ1 11.07980 -99808.00 3.00000 3.46002
AQ2 -0.317840 -1554.220 11.85880 -21365.000
FeCl+ FE(1)CL(1)E(1)
ST -53030.000 -61260.0000 -10.0600 0.0
AQ1 24.67370 11555.00 1.00000 1.34001
AQ2 0.207560 -271.340 6.81650 -26668.000
FeCl2,aq FE(1)CL(2)E(0)
ST -81280.000 -100370.0000 -4.2200 0.0
AQ1 25.11890 36488.00 0.00000 -3000.00000
AQ2 0.540850 542.470 3.61790 -30033.000
H+ H(1)E(1)
ST 0.000 0.0000 0.0000 0.0
AQ1 0.00000 0.00 1.00000 3.08200
AQ2 0.000000 0.000 0.00000 0.000
H2,aq H(2)E(0)
ST 4236.000 -1000.0000 13.8000 0.0
AQ1 27.62510 50930.00 0.00000 -20900.00000
AQ2 0.514270 477.580 3.87290 -29764.000
HAlO2,aq H(1)AL(1)O(2)E(0)
ST -207500.000 -230730.0000 -6.5000 0.0
AQ1 39.00000 25000.00 0.00000 30000.00000
AQ2 0.368080 120.580 5.27610 -28288.000
HCO3- H(1)C(1)O(3)E(-1)
ST -140282.000 -164898.0000 23.5300 0.0
AQ1 12.93950 -47579.00 -1.00000 2.26010
AQ2 0.756210 115.050 1.23460 -28266.000
HO2- H(1)O(2)E(-1)
ST -16100.000 -38320.0000 5.7000 0.0
AQ1 2.70070 -91863.00 -1.00000 1.65004
AQ2 0.306710 -29.240 5.86490 -27669.000
HSiO3- H(1)SI(1)O(3)E(-1)
ST -242300.000 -271880.0000 10.0000 0.0
AQ1 0.43120 -97567.00 -1.00000 1.77001
AQ2 0.363250 108.810 5.32240 -28240.000
K+ K(1)E(1)
ST -67510.000 -60270.0000 24.1500 0.0
AQ1 7.40000 -17910.00 1.00000 2.26999
AQ2 0.355900 -147.300 5.43500 -27120.000
KAlO2,aq K(1)AL(1)O(2)E(0)
ST -264381.000 -274982.0000 35.7000 0.0
AQ1 1.39400 12120.00 0.00000 -5000.00000
AQ2 0.600700 688.580 3.04360 -30637.000
KCl,aq K(1)CL(1)E(0)
ST -96850.000 -96810.0000 42.2500 0.0
AQ1 -2.49890 -58864.00 0.00000 -5000.00000
AQ2 0.681120 884.970 2.27170 -31448.000
KHSO4,aq K(1)H(1)S(1)O(4)E(0)
ST -246550.000 -270540.0000 56.3100 0.0
AQ1 28.42770 47060.00 0.00000 -100.00000
AQ2 0.905960 1433.970 0.11390 -33718.000
KOH,aq K(1)O(1)H(1)E(0)
ST -103877.000 -112104.0000 28.0000 0.0
AQ1 -0.48800 6520.00 0.00000 -5000.00000
AQ2 0.368080 120.580 5.27610 -28288.000
KSO4- K(1)S(1)O(4)E(-1)
ST -246640.000 -276980.0000 35.0000 0.0
AQ1 9.85040 -52753.00 -1.00000 2.96000
AQ2 0.607760 705.850 2.97570 -30708.000
Mg(CO3),aq MG(1)C(1)O(3)E(0)
ST -238760.000 -270570.0000 -24.0000 0.0
AQ1 -8.66760 -80945.00 0.00000 -3000.00000
AQ2 -0.058370 -920.670 9.36870 -23984.000
MG(HCO3)+ MG(1)H(1)C(1)O(3)E(1)
ST -250200.000 -275750.0000 -3.0000 0.0
AQ1 49.00650 99391.00 1.00000 1.45996
AQ2 0.271710 -114.690 6.20080 -27316.000
Mg+2 MG(1)E(2)
ST -108505.000 -111367.0000 -33.0000 0.0
AQ1 20.80000 -58920.00 2.00000 2.54000
AQ2 -0.082170 -859.900 8.39000 -23900.000
MgCl+ MG(1)CL(1)E(1)
ST -139700.000 -151440.0000 -20.5000 0.0
AQ1 39.02350 56430.00 1.00000 1.18999
AQ2 0.222690 -234.400 6.67130 -26821.000
MgF+ MG(1)F(1)E(1)
ST -177690.000 -190950.0000 -28.0700 0.0
AQ1 37.96530 49097.00 1.00000 1.10003
AQ2 0.064940 -619.580 8.18520 -25229.000
Mn+2 MN(1)E(2)
ST -54500.000 -52724.0000 -17.6000 0.0
AQ1 16.66740 -38698.00 2.00000 2.68002
AQ2 -0.010160 -802.950 8.90600 -24471.000
MnCl+ MN(1)CL(1)E(1)
ST -86290.000 -88280.0000 12.0000 0.0
AQ1 27.99360 33718.00 1.00000 1.82990
AQ2 0.274480 -107.930 6.17430 -27344.000
MnO4- MN(1)O(4)E(-1)
ST -106900.000 -129400.0000 45.7000 0.0
AQ1 13.74270 -34013.00 -1.00000 4.17047
AQ2 0.782890 1133.460 1.29500 -32476.000
MnO4-2 MN(1)O(4)E(-2)
ST -119700.000 -156000.0000 14.0000 0.0
AQ1 -0.92670 -151140.00 -2.00000 3.44991
AQ2 0.652910 816.090 2.54240 -31164.000
Na+ NA(1)E(1)
ST -62591.000 -57433.0000 13.9600 0.0
AQ1 18.18000 -29810.00 1.00000 1.90990
AQ2 0.183900 -228.500 3.25600 -27260.000
NaAlO2,aq NA(1)AL(1)O(2)E(0)
ST -260277.000 -277259.0000 11.1000 0.0
AQ1 32.43000 38000.00 0.00000 -10000.00000
AQ2 0.476400 48.500 12.66900 -48975.000
NaCl,aq NA(1)CL(1)E(0)
ST -92910.000 -96120.0000 28.0000 0.0
AQ1 10.80000 -13000.00 0.00000 -3800.00000
AQ2 0.503630 473.650 3.41540 -29748.000
NaF,aq NA(1)F(1)E(0)
ST -128570.000 -135860.0000 12.0000 0.0
AQ1 12.43070 -7613.00 0.00000 -3000.00000
AQ2 0.274830 -107.080 6.17090 -27347.000
NaHSiO3,aq NA(1)H(1)SI(1)O(3)E(0)
ST -307140.000 -332740.0000 20.0000 0.0
AQ1 8.60950 -20894.00 0.00000 -3000.00000
AQ2 0.417420 241.080 4.80250 -28787.000
NaOH,aq NA(1)O(1)H(1)E(0)
ST -99095.000 -112927.0000 6.0000 0.0
AQ1 22.00000 30000.00 0.00000 -72000.00000
AQ2 0.146750 -419.820 7.40010 -26054.000
O2,aq O(2)E(0)
ST 3954.000 -2900.0000 26.0400 0.0
AQ1 35.35300 83726.00 0.00000 -39430.00000
AQ2 0.578890 635.360 3.25280 -30417.000
OH- O(1)H(1)E(-1)
ST -37595.000 -54977.0000 -2.5600 0.0
AQ1 4.15000 -103460.00 -1.00000 1.40001
AQ2 0.125270 7.380 1.84230 -27821.000
SiO2,aq SI(1)O(2)E(0)
ST -199190.000 -209775.0000 18.0000 0.0
AQ1 29.10000 -512000.00 0.00000 12910.00000
AQ2 0.190000 170.000 20.00000 -27000.000
!
!========================================================================
! buffers used with aqueous solutions
!========================================================================
!
***** GuS DATA *****
!CLCL CL(1) clx BN
! ST 0.000 0.00000 1000.00000000 0.000000
! C1 0.000000 0.00000 0.00 0.0
!HAHA H(1) hx BN
! ST 0.000 0.00000 10.00000000 0.000000
! C1 0.000000 0.00000 0.00 0.0
!COM HYDROGEN[1]
HCL-buffer H(1)CL(1) hclx BN
ST 0.000 0.00000 150.00000000 0.000000
C1 0.000000 0.00000 0.00 0.0
COM H+[1]Cl-[1]
-HCL-buffer H(-1)CL(-1) -hclx BN
ST 0.000 0.00000 0.00000000 0.000000
C1 0.000000 0.00000 0.00 0.0
COM HCL-buffer[-1]
CHARGE E(1) ep zBN
! in S0: pH * ln(10) * 8.3143 (assuming that O2 gas is stable)
! in S0: pH * 19.14438 (assuming that O2 gas is stable)
! e.g. pH=7 -> S0=134.01068267
ST 0.000 0.00000 134.01068267 0.000000
C1 0.000000 0.00000 0.00 0.0
COM STEAM[-0.5]Ox-Buffer[0.25]
!
!========================================================================
! fixed phases
!========================================================================
!
!***** FaXED PHASES *****
!0 PL1 FSP ALBITE(0.83) ANORTHITE(0.15) K-FELDSPAR(0.02)
!0 PL2 FSP ALBITE(0.70) ANORTHITE(0.30) K-FELDSPAR(0.00)
