# Supplementary material for: Deeply subducted continental fragments – Part 2: Insight from petrochronology in the central Sesia Zone (western Italian Alps)
Source: Copernicus journal article supplement (doi:10.5194/se-9-191-2018), 2018-02-26
Supplement: Supplementary file 2 [file se-9-191-2018-supplement.zip › S5 Mineral compositions.xlsx]

## Sheet: FG1324
Garnet					Included in Aln			Phengite							Omphacite				Glaucophane
Spot analyses								Spot analyses				Included in Aln			Spot analyses				Spot analyses
wt%								wt%							wt%				wt%
SiO2		37.75	37.93	37.74	37.73			SiO2	51.34	49.24	51.99	51.16			SiO2	58.3	57.85		SiO2	57.2	57.05	56.71
TiO2		0	0.006	0.0359	0.0205			TiO2	0.4116	0.5252	0.5275	0.3473			Al2O3	18.47	18.14		TiO2	0.032	0.036	0.046
Al2O3		21.59	21.62	21.53	21.63			Al2O3	26.67	26.82	26.83	27.48			CaO	4.97	5.12		Al2O3	12.75	12.74	12.82
FeO		31.16	31.12	31.77	31.93			FeO	1.67	1.39	1.64	1.6			Na2O	11.73	11.59		FeO	6.91	7.08	7.34
MnO		0.6471	0.6279	0.6007	0.7053			MnO	0	0	0	0			FeO	3.35	3.41		MnO	0	0.084	0.023
MgO		4.5	4.73	4.35	4.12			MgO	3	3.37	3.45	3.25			MgO	3.22	3.54		MgO	11.57	11.64	11.4
CaO		4.1	3.94	3.87	3.85			CaO	0	0	0	0			TiO2	0.07	0.093		CaO	0.683	0.807	0.705
Cr2O3		0	0	0	0			Na2O	0.6157	0.8621	0.7435	0.849			Total	100.11	99.743		Na2O	7.56	7.35	7.52
Total		99.7471	99.9739	99.8966	100.003			K2O	10.16	10.14	10.33	10.22			Structural Formula 6 O				K2O	0.068	0.037	0.046
								Total	93.8673	92.3473	95.511	94.9063			Si	2.014	2.005		Total	96.773	96.834	96.707
Analyzed mole fractions (excluded XSps)								Structural Formula 11 O							Ti	0.002	0.002		Structural Formula 23 O
								Si	3.4563	3.38157	3.4445	3.41174			Al	0.752	0.741		Si	7.789	7.774	7.75
XAlm		69.1065	68.7957	70.4579	71.07			Ti	0.0208462	0.0271345	0.0262922	0.017424			Cr	0	0		Ti	0.003	0.004	0.005
XGro		11.6495	11.1589	10.9958	10.98			Al	2.11609	2.17077	2.09499	2.15982			Fe3	0.002	0.022		Al	2.047	2.047	2.066
XPrp		17.7904	18.6396	17.1971	16.35			Fe	0.0940243	0.0798332	0.0908697	0.089235			Fe2	0.095	0.077		Fe3	0.212	0.2	0.246
XSps		1.45353	1.40586	1.34927	1.6			Mn	0	0	0	0			Mn	0	0		Fe2	0.575	0.602	0.593
								Mg	0.301084	0.345017	0.340751	0.323102			Mg	0.166	0.183		Mn	0	0.009	0.002
Model	COMPUTATION WITHOUT Mn							Ca	0	0	0	0			Ca	0.184	0.19		Mg	2.348	2.364	2.322
			620°C-1.7GPa					Na	0.0803654	0.11479	0.0955063	0.109773			Na	0.786	0.779		Ca	0.0987	0.118	0.104
XAlm			72					K	0.872581	0.888372	0.873099	0.869465			XMg	0.631179	0.648936		Na	1.996	1.942	1.993
XGro			11.3					XMg	0.762029	0.812091	0.789468	0.783587							K	0.012	0.007	0.009
XPrp			16.6
							Model	Si	3.4					Model	Al	0.71
Structural Formula 12 O							620°C-1.7GPa	Al	2.21					620°C-1.7GPa	XMg	0.55
Si		2.99296	2.99709	2.99374	2.99419			XMg	0.75
Ti		0	0.000356524	0.00214154	0.00119356
Al		2.0174	2.01339	2.01285	2.02304
Fe3		0	0	0	0
Fe2		2.06603	2.05642	2.10759	2.11908
Mn		0.0434551	0.0420235	0.0403604	0.047724
Mg		0.53187	0.557168	0.51441	0.487415
Ca		0.348278	0.333557	0.328913	0.327349
Cr		0	0	0	0
Assemblage Theriak
1	620°C-1.7GPa	Vol%	Qz 41%; Phe 19.6%; Omp 18.1%; Pg 8.1%; Grt 6.7%; Bt 6.0%; Rt 0.5%
Extimated in thin section			Qz 40%; Phe 20%; Omp 15%; Gln 10%; Grt 10%; remaining 5%: Ep, Ab, Chl, Rt, opaques and Zrn
Bulk
	XRF, no Mn	SI(1.11799)AL(0.2817)FE(0.07257)MN(0)MG(0.06402)CA(0.03442)NA(0.09035)TI(0.008861)K(0.05754)H(1)O(?)O(0)

## Sheet: FG1315
Garnet		Pre	1	2	3	Included in Aln	Included in Aln											Phengite		Included in Aln			Paragonite				Included in Aln
Average comp																							Spot analyses wt%
wt%																		wt%	Average	Spot
SiO2		37.7	37.955	37.81	37.4369	37.73	38.12											SiO2	50.886	51.28			SiO2	47.97	47.93	47.87	48.65
TiO2		0.012816	0.01	0.012206	0.011926	0.0238	0.0367											TiO2	0.256	0.2976			TiO2	0.0589	0.0459	0.0583	0.0711
Al2O3		21.2728	21.44	21.4601	21.3248	21.3	21.4											Al2O3	28.147	27.8			Al2O3	39.04	39.15	39.05	38.62
FeO		31.4647	27.94	30.0307	32.0673	32.67	30.9											FeO	1.494	1.54			FeO	0.1784	0.1549	0.1784	0.3154
MnO		0.61455	0.41	0.42006	0.30905	0.5265	0.4158											MnO	0.061	0			MnO	0	0	0	0
MgO		7.1881	5.33	6.1761	6.2957	5.11	5.7											MgO	3.683	3.36			MgO	0.1625	0.1353	0.136	0.1654
CaO		1.3061	6.72	4.1713	2.0754	1.89	2.87		GARNET RESORPTION (vol-%)									CaO	0	0.032			CaO	0.1607	0.1463	0.1512	0.2843
Cr2O3		0	0	0	0	0	0				Grt1	Grt2	Grt3	Grt4	Total			Na2O	0.773	0.7476			Na2O	7.19	7.38	7.06	6.81
Total		99.5591	99.805	100.08	99.5211	99.2503	99.4425		Pre		0	0	0	0	0			K2O	10.242	10.28			K2O	0.69	0.701	0.662	0.7333
									1		3.688	0	0	0	3.688			Total	95.542	95.3372			Total	95.4506	95.6434	95.1659	95.6495
Analyzed mole fractions (excluded XSps)									2		2.294	2.589	0	0	4.884			Structural Formula 11 O					Structural Formula 11 O
									3		4.956	0.452	3.111	0	8.52			Si	3.373	3.40284			Si	3.04977	3.04353	3.05006	3.08327
XAlm		0.685	0.607	0.65	0.698	0.739133	0.69											Ti	0.013	0.0148568			Ti	0.002817	0.002193	0.002795	0.00338996
XGro		0.037	0.187	0.11	0.058	0.054782	0.08		VOLUME OF GARNET (vol-%)									Al	2.199	2.17417			Al	2.92524	2.92992	2.93238	2.88466
XPrp		0.279	0.206	0.24	0.244	0.206085	0.22				Grt1	Grt2	Grt3	Grt4	Total			Fe	0.083	0.085464			Fe	0.009486	0.008226	0.009506	0.016717
									Pre		13.944	0	0	0	13.944			Mn	0.003	0			Mn	0	0	0	0
									1		10.256	5.541	0	0	15.797			Mg	0.364	0.332387			Mg	0.015401	0.012808	0.012918	0.015627
Model	COMPUTATION WITHOUT Mn								2		7.961	2.952	5.612	0	16.525			Ca	0	0.00227519			Ca	0.010947	0.009954	0.010322	0.0193054
		750°C-0.82GPa	650°C-1.52GPa	650°C-1.9GPa	670°C-1.8GPa				3		3.005	2.5	2.5	8.634	16.639			Na	0.099	0.0961851			Na	0.88628	0.908595	0.872154	0.836796
XAlm		0.684	0.607	0.647	0.667													K	0.866	0.870249			K	0.055963	0.056786	0.053809	0.0592879
XGro		0.036	0.186	0.115	0.075				NEWLY GROWN GARNET (vol-%)									XMg	0.815	0.795468			XMg	0.618856	0.608917	0.576073	0.483149
XPrp		0.279	0.206	0.237	0.258						Grt1	Grt2	Grt3	Grt4	Total
									Pre		13.944	0	0	0	13.944		Model	Si	3.38			Model	Si	3.008
Structural Formula 12 O									1		0	5.541	0	0	5.541		670°C-1.8GPa	Al	2.22			670°C-1.8GPa	Al	2.983
Si		2.965	2.97424	2.95801	2.95748	3.011	3.015		2		0	0	5.612	0	5.612			XMg	0.82				XMg	0.657
Ti		0.001	0.000589288	0.000718104	0.000708497	0.001	0.002		3		0	0	0	8.634	8.634
Al		1.972	1.9801	1.9787	1.98547	2.003	1.995
Fe3		0.097	0.0702376	0.103834	0.0981496	0	0		ROCK DENSITY (g/ccm)
Fe2		1.972	1.76077	1.86095	2.02041	2.18002	2.04399				Density
Mn		0.041	0.027213	0.027835	0.0206793	0.0358192	0.0281383		Pre		2.9
Mg		0.843	0.622648	0.720305	0.741438	0.607832	0.67212		1		2.982
Ca		0.11	0.564201	0.349641	0.175664	0.161575	0.243222		2		3.016
Cr		0	0	3.58135e-08	3.3853e-08	3.3853e-08	3.3853e-08		3		3.012
Assemblages Theriak
Pre	750°C-0.82GPa	Vol%	Qz 41.2%; Wm (Ms80) 24.4%; Grt 13.9%; Fsp (An20) 12%; Bt 5%; Sill 2.7%; Rt 0.7%
1	650°C-1.52GPa	Vol%	Qz 46%; Phe 33.4%; Pg 10.7%; Grt 6.2%; Ab 1.8%; Bt 0.9%; Rt 0.8%; Amp 0.2%
2	650°C-1.9GPa	Vol%	Qz 45.7%; Phe 33.3%; Pg 13.4%; Grt 6.3%; Rt 0.8%;Omp 0.5%
3	670°C-1.8GPa	Vol%	Qz 44%; Phe 32.2%; Pg 12.9%; Grt 9.4%; Rt 0.8%Omp 0.3%; Bt 0.1%
Extimated in thin section			Qz 50%; Phe 20%; Pg 10%; Grt 15% (TOTAL); remaining 5%:epidote, chlorite, albite, rutile, graphite and zircon
Bulk
Pre	XRF, no Mn	SI(1.0666)AL(0.33582)FE(0.097286)MN(0)MG(0.058065)CA(0.012839)NA(0.033882)TI(0.0122)K(0.066454)H(1)O(?)O(0)
1	less %Grt core	SI(1.141)AL(0.32202)FE(0.039565)MN(0)MG(0.037668)CA(0.011056)NA(0.039624)TI(0.014246)K(0.077681)H(1)O(?)O(0)
2	less %Grt core and Rim1	SI(1.1997)AL(0.33842)FE(0.043621)MN(0)MG(0.041576)CA(0.0074192)NA(0.041674)TI(0.014983)K(0.081709)H(1)O(?)O(0)
3	less %Grt core, Rim1 and 2	SI(1.2007)AL(0.35037)FE(0.064528)MN(0)MG(0.050027)CA(0.0068852)NA(0.040645)TI(0.01462)K(0.079631)H(1)O(?)O(0)

## Sheet: FG12157
Garnet		Pre	1	2										Phengite		Included in Aln		Glaucophane
Average composition																		Average composition
wt%														wt%	Average	Spot		wt%	Core	Rim
SiO2		38.1718	38.4265	38.7394										SiO2	49.613	51.91		SiO2	56.644	55.942
TiO2		0.06904	0.071746	0.17003										TiO2	0.307	0.2363		TiO2	0.019	0.018
Al2O3		21.0673	21.2039	21.2375										Al2O3	27.579	27.01		Al2O3	12.182	11.765
FeO		31.233	29.0497	26.8256										FeO	2.091	1.98		FeO	8.102	11.426
MnO		1.0015	0.56889	0.55538										MnO	0.193	0		MnO	0.309	0.371
MgO		6.4107	5.078	4.2209										MgO	3.65	2.98		MgO	10.412	8.181
CaO		1.3819	5.5893	8.3889										CaO	0.191	0		CaO	0.928	0.834
Cr2O3		0.039331	0.039863	0.040479		GARNET RESORPTION (vol-%)								Na2O	0.664	0.575		Na2O	7.133	6.823
Total		99.3746	100.028	100.178				Grt1	Grt2	Grt3	Total			K2O	9.973	10.68		K2O	0.038	0.025
						Pre		0	0	0	0			Total	94.261	95.3713		Total	95.767	95.385
Analyzed mole fractions (excluded XSps)						1		1.377	0	0	1.377			Structural Formula 11 O				Structural Formula 23 O
						2		1.478	7.325	0	8.804			Si	3.347	3.45244		Si	7.859	7.921
XAlm		0.703	0.642	0.59										Ti	0.016	0.0118232		Ti	0.002	0.002
XGro		0.04	0.158	0.238										Al	2.194	2.11716		Al	1.992	1.965
XPrp		0.257	0.2	0.167		VOLUME OF GARNET (vol-%)								Fe	0.118	0.110131		Fe3	0.119	0.034
								Grt1	Grt2	Grt3	Total			Mn	0.011	0		Fe2	0.82	1.32
Model	COMPUTATION WITHOUT Mn					Pre		7.109	0	0	7.109			Mg	0.367	0.295462		Mn	0.036	0.044
		900°C-0.61GPa	650°C-1.6GPa	650°C-1.4GPa		1		5.733	10.81	0	16.543			Ca	0.014	0		Mg	2.153	1.726
XAlm		0.69316	0.642	0.59		2		4.254	3.485	10.583	18.322			Na	0.087	0.0741458		Ca	0.121	0.126
XGro		0.050473	0.158	0.238										K	0.858	0.906154		Na	1.879	1.862
XPrp		0.25636	0.2	0.167										∑ cations	7.012	6.96731		K	0.007	0.005
						NEWLY GROWN GARNET (vol-%)								XMg	0.758	0.72847		∑ cations	14.988	15.005
Structural Formula 12 O								Grt1	Grt2	Grt3	Total		Model	Si	3.34
Si		3.021	3.01868	3.035		Pre		7.109	0	0	7.109		650°C-1.6GPa	Al	2.31
Ti		0.004	0.00423843	0.0100173		1		0	10.81	0	10.81			XMg	0.8
Al		1.965	1.96317	1.96094		2		0	0	10.583	10.583
Fe3		0	0	0
Fe2		2.067	1.90846	1.75756
Mn		0.067	0.037853	0.0368537		ROCK DENSITY (g/ccm)
Mg		0.756	0.594685	0.492968		Pre		2.772
Ca		0.117	0.470437	0.704154		1		3.05
Cr		0.002	0.00247589	0.00250732		2		3.007
Assemblages Theriak
Pre	900°C-0.61GPa	Vol%	Kfs 27.9%; Qz 23.3%; Plag (An 50) 17.4%; Crd 15.7; Opx 7.3%; Grt 7.1%; Ilm 1.2%
1	650°C-1.6GPa	Vol%	Qz 34.9%; Phe 34.5%; Grt 11.7%; Omp 8%; Pg 4%; Bt 3.7%; Ab 2.3%; Rt 0.8%
2	650°C-1.4GPa	Vol%	Qz 35%; Phe 32.1%; Ab 11.92%; Grt 11.6%; Bt 6%; Amp 2.4%; Rt 0.83%; Di 0.1%
Extimated in thin section			Qz 40%; Phe 30%; Grt 15% (TOTAL); Gln+ Ep 10%; remaining 5%: Chl, Ab, Rt, Ttn, Ilm, Gr and Zrn
Bulk
Pre	XRF, no Mn	SI(1.0045)AL(0.32385)FE(0.11065)MN(0)MG(0.081638)CA(0.037268)NA(0.038399)TI(0.013228)K(0.075796)H(1)O(?)O(0)
1	less %Grt core	SI(1.0381)AL(0.3157)FE(0.08112)MN(0)MG(0.074582)CA(0.038422)NA(0.041752)TI(0.014351)K(0.082684)H(1)O(?)O(0)
2	less %Grt core and Rim 1	SI(1.0814)AL(0.32411)FE(0.077852)MN(0)MG(0.076966)CA(0.036195)NA(0.044012)TI(0.015121)K(0.087223)H(1)O(?)O(0)

## Sheet: FG1347
Garnet		Pre	1	2	3											Phengite		Included in Aln			Chloritoid				Paragonite	Intergrown with Aln
Average composition																					Average composition				Wt%
wt%																wt%	Average	Spot			wt%	Average				Spot
SiO2		37.7479	37.8842	38.182	37.7481											SiO2	49.425	50.63			SiO2	24.709			SiO2	47.78
TiO2		0.02177	0.024367	0.023531	0.028219											TiO2	0.229	0.2519			TiO2	0.006			TiO2	0.0467
Al2O3		21.2461	21.28	21.0948	21.2115											Al2O3	29.776	29.86			Al2O3	41.011			Al2O3	38.45
FeO		31.2966	30.1851	30.8166	31.9613											FeO	1.402	1.1605			FeO	17.662			FeO	0.2659
MnO		0.91766	0.37363	0.3944	0.34795											MnO	0.058	0			MnO	0.052			MnO	0
MgO		7.0453	5.7585	6.5996	6.6225		GARNET RESORPTION (vol-%)									MgO	3.294	2.68			MgO	7.257			MgO	0.1598
CaO		1.139	3.9621	2.1297	1.4943				Grt1	Grt2	Grt3	Grt4	Total			CaO	0.01	0			CaO	0.008			CaO	0.2637
Cr2O3		0	0	0	0		Pre		0	0	0	0	0			Na2O	0.712	0.7966			Na2O	0			Na2O	6.98
Total		99.4143	99.4679	99.2406	99.4139		1		1.589	0	0	0	1.589			K2O	10.348	10.27			K2O	0.005			K2O	0.7958
							2		3.177	1.435	0	0	4.613			Total	95.254	95.649			Total	90.71			Total	94.7419
Analyzed mole fractions (excluded XSps)							3		0	0	0	0	0			Structural Formula 11 O					Structural Formula 13 O				Structural Formula 11 O
																Si	3.29	3.34059			Si	2.176			Si	3.06244
XAlm		0.691	0.663	0.681	0.7		VOLUME OF GARNET (vol-%)									Ti	0.011	0.0125038			Al	4.258			Ti	0.002252
XGro		0.032	0.111	0.059	0.042				Grt1	Grt2	Grt3	Grt4	Total			Al	2.336	2.32199			Ti	0.001			Al	2.9045
XPrp		0.277	0.226	0.26	0.258		Pre		17.663	0	0	0	17.663			Fe	0.078	0.0640367			Fe	1.301			Fe	0.014253
							1		16.074	2.796	0	0	18.87			Mn	0.003	0			Mn	0.004			Mn	0
Model	COMPUTATION WITHOUT Mn						2		12.897	1.36	5.006	0	19.263			Mg	0.327	0.263609			Mg	0.953			Mg	0.015269
		780°C-0.81GPa	590°C-1.9GPa	600°C-1.8GPa	600°C-2GPa		3		12.897	1.36	5.006	1.987	21.25			Ca	0.001	0			Ca	0.001			Ca	0.018109
XAlm		0.69899	0.66303	0.68069	0.69978											Na	0.092	0.101906			Na	0.001			Na	0.867402
XGro		0.031917	0.11141	0.059427	0.0418		NEWLY GROWN GARNET (vol-%)									K	0.879	0.864455			K	0.001			K	0.06507
XPrp		0.26909	0.22556	0.25989	0.25842				Grt1	Grt2	Grt3	Grt4	Total			XMg	0.807	0.804555			XMg	0.422804			XMg	0.517208
							Pre		17.663	0	0	0	17.663
Structural Formula 12 O							1		0	2.796	0	0	2.796		Model	Si	3.34			Model				Model	Si	3
Si		2.976	2.99	3.016	2.982		2		0	0	5.006	0	5.006		600°C-2GPa	Al	2.3			600°C-2GPa	XMg	0.48		600°C-2GPa	Al	2.99
Ti		0.001	0.001	0.001	0.002		3		0	0	0	1.987	1.987			XMg	0.8								XMg	0.65
Al		1.974	1.979	1.964	1.975															600°C-1.8GPa	XMg	0.49
Fe3		0.072	0.038	0.002	0.057		ROCK DENSITY (g/ccm)								600°C-1.8GPa	Si	3.29							600°C-1.8GPa	Si	3
Fe2		1.992	1.954	2.033	2.054				Density							Al	2.4								Al	2.99
Mn		0.061	0.025	0.026	0.023		Pre		2.981							XMg	0.79								XMg	0.65
Mg		0.828	0.677	0.777	0.78		1		3.103
Ca		0.096	0.335	0.18	0.126		2		3.102
Cr		0	0	0	0		3		3.137
Assemblages Theriak
Pre	780°C-0.81GPa	Vol%	Qz 33.1%; Kfs 23.5%; Grt 18.1%; Wm (Ms80); Sil 16.4%; Bt 8.1%; Rt 1%
1	590°C-1.9GPa	Vol%	Qz 41.5%; Phe 40%; Pg 6.6%; Chd 5.7; Ky 3.3%; Grt2.9%; Rt 1%
2	600°C-1.8GPa	Vol%	Qz 40.5%; Phe 38.1%; Chd 6.3; Pg 6%; Grt5.5%; Ky 2.6%; ; Rt 1%
3	600°C-2GPa	Vol%	Qz 41.4%; Phe 39.4%; Pg 7.1%; Ky 4.9%; Chd 3.3; Grt2.9%; Rt 1%
Extimated in thin section			Qz 35%; Micas (mostly Phg, minor Pg) 25%; Cld 15%; Grt 15% (TOTAL); remaining 10%:epidote, chlorite, rutile, opaques and zircon
Bulk
Pre	XRF, no Mn	SI(0.97304)AL(0.39996)FE(0.12443)MN(0)MG(0.07072)CA(0.0069544)NA(0.017425)TI(0.014384)K(0.069214)H(1)O(?)O(0)
1	less %Grt core	SI(1.0701)AL(0.39522)FE(0.037098)MN(0)MG(0.041531)CA(0.0031998)NA(0.022317)TI(0.01835)K(0.088586)H(1)O(?)O(0)
2	less %Grt core and Rim1	SI(1.1138)AL(0.41947)FE(0.056971)MN(0)MG(0.050408)CA(0.003162)NA(0.022659)TI(0.018642)K(0.089954)H(1)O(?)O(0)
3	less %Grt core, Rim1 and 2	SI(1.2715)AL(0.46684)FE(0.037634)MN(0)MG(0.048238)CA(0.0010956)NA(0.026763)TI(0.022001)K(0.10623)H(1)O(?)O(0)

## Sheet: FG1249
Garnet		Pre	1	2	3											Phengite		Included in Aln		Paragonite		Included in Aln
Average composition
wt%																wt%	Average	Spot		wt%	Average	Spot
SiO2		36.9085	36.6183	37.7974	37.9785											SiO2	49.566	50.43		SiO2	45.434	47.33
TiO2		0.045971	0.16399	0.27461	0.036674											TiO2	0.244	0.29		TiO2	0.049	0.072
Al2O3		20.8304	21.356	21.1813	21.7682											Al2O3	27.924	28.08		Al2O3	39.845	38.64
FeO		33.0648	34.2262	28.7875	27.1165											FeO	1.298	1.53		FeO	0.458	0.3878
MnO		2.3088	0.37027	0.66002	0.56003											MnO	0.045	0		MnO	0.032	0
MgO		4.6547	3.8556	5.1848	4.8645											MgO	3.447	3.31		MgO	0.175	0.2569
CaO		1.7712	3.2696	6.3498	8.3762											CaO	0.008	0.1814		CaO	0.216	0.2684
Cr2O3		0.034863	0.036197	0.031422	0.034319		GARNET RESORPTION (vol-%)									Na2O	0.869	0.9567		Na2O	7.345	7.05
Total		99.6192	99.8962	100.267	100.735				Grt1	Grt2	Grt3	Grt4	Total			K2O	9.968	10.2		K2O	0.494	0.8774
							Pre		0	0	0	0	0			Total	93.369	94.9781		Total	94.048	94.8825
Analyzed mole fractions							1		1.99	0	0	0	1.99			Structural Formula 11 O				Structural Formula 11 O
							2		0.206	0.047	0	0	0.252			Si	3.358	3.3665		Si	2.945	3.03633
XAlm		0.719	0.756	0.624	0.583		3		0.014	0.061	6.875	0	6.95			Ti	0.012	0.014564		Ti	0.002	0.003475
XGro		0.049	0.092	0.176	0.231											Al	2.23	2.20923		Al	3.044	2.92149
XPrp		0.18	0.152	0.2	0.186		VOLUME OF GARNET (vol-%)									Fe	0.074	0.085418		Fe	0.025	0.020806
XSps		0.051	-	-	-				Grt1	Grt2	Grt3	Grt4	Total			Mn	0.003	0		Mn	0.002	0
							Pre		9.993	0	0	0	9.993			Mg	0.348	0.329403		Mg	0.017	0.024569
Model	COMPUTATION WITH Mn ONLY FOR CORE						1		8.003	2.002	0	0	10.005			Ca	0.001	0.012975		Ca	0.015	0.018449
		730°C-0.6GPa	620°C-0.62GPa	615°C-1.6GPa	660°C-1.5GPa		2		7.797	1.956	9.949	0	19.703			Na	0.114	0.123825		Na	0.923	0.87689
XAlm		0.71673	0.73657	0.62385	0.58752		3		7.783	1.895	3.074	8.598	21.35			K	0.862	0.868652		K	0.041	0.071807
XGro		0.060213	0.10603	0.17604	0.19122											XMg	0.827	0.794085		XMg	0.566	0.541466
XPrp		0.18581	0.1574	0.20011	0.22126		NEWLY GROWN GARNET (vol-%)
XSps		0.037254	-	-	-				Grt1	Grt2	Grt3	Grt4	Total		Model				Model
							Pre		9.993	0	0	0	9.993		615°C-1.6GPa	Si	3.37		615°C-1.6GPa	Si	3
Structural Formula 12 O							1		0	2.002	0	0	2.002			Al	2.3			Al	2.98
Si		2.95372	2.92574	2.96	2.948		2		0	0	9.949	0	9.949			XMg	0.82			XMg	0.67
Ti		0.00276661	0.00985316	0.016	0.002		3		0	0	0	8.598	8.598
Al		1.9647	2.01101	1.955	1.991											Si	3.31			Si	3
Fe3		0.120118	0.115521	0.091	0.106		ROCK DENSITY (g/ccm)								660°C-1.5GPa	Al	2.37		660°C-1.5GPa	Al	2.98
Fe2		2.0928	2.17141	1.794	1.654				Density							XMg	0.82			XMg	0.69
Mn		0.1565	0.0250577	0.044	0.037		Pre		2.892
Mg		0.55532	0.459238	0.605	0.563		1		2.925
Ca		0.151869	0.279892	0.533	0.697		2		3.073
Cr		0	0	0	0		3		3.062
Assemblages Theriak
Pre	730°C-0.6GPa	Vol%	Qz 30.1%; Kfs 19.2%; Bt 14.3%; Plag (An 50) 13.3%; Sil 11.3%; Grt 10.5%; Ilm 1.3%
1	620°C-0.62GPa	Vol%	Qz 36.2%; Ms 29.4%; Plag (An 51) 14.6%;Bt 13%; St 3%; Grt 2.4%; Ilm 1.4%
2	615°C-1.6GPa	Vol%	Phe 43%; Qz 33.4%; Grt 11%; Pg 8%; Omp 2.5%; Rt 0.9%
3	660°C-1.5GPa	Vol%	Phe 45.4%; Qz 34.1%; Grt 9.7%; Ab 4.5%; Pg 2.6%; Omp 0.2%; Rt 0.9%
Extimated in thin section			Qz 40%; Phe 30%; Grt 15% (TOTAL); Pg 10%; remaining 5%: Ep, Chl, Ab, Rt, Gln, Zrn and opaques
Bulk
Pre	XRF	SI(0.97887)AL(0.37015)FE(0.11983)MN(0.0032422)MG(0.068486)CA(0.028531)NA(0.028396)TI(0.013228)K(0.083652)H(1)O(?)O(0)
1	less %Grt core; no Mn	SI(1.0257)AL(0.36521)FE(0.076111)MN(0)MG(0.062461)CA(0.028141)NA(0.031837)TI(0.014845)K(0.094372)H(1)O(?)O(0)
2	less %Grt core and Rim1; no Mn	SI(1.0832)AL(0.38097)FE(0.070374)MN(0)MG(0.064734)CA(0.0286)NA(0.034019)TI(0.015824)K(0.10094)H(1)O(?)O(0)
3	less %Grt core, Rim1 and 2; no Mn	SI(1.1775)AL(0.40651)FE(0.06276)MN(0)MG(0.066689)CA(0.026901)NA(0.037678)TI(0.017413)K(0.11202)H(1)O(?)O(0)

## Sheet: FG1420
Garnet		Core	1	2	3											Phengite
Average composition																Average composition
wt%																wt%	High Si	Low Si
SiO2		38.2931	37.5656	37.7708	37.6116											SiO2	50.824	48.54
TiO2		0.095788	0.095141	0.097909	0.090974											TiO2	0.15	0.125
Al2O3		21.0385	21.3031	21.1067	21.2155											Al2O3	27.448	30.173
FeO		23.9775	25.5713	27.0384	28.4671											FeO	3.211	2.627
MnO		3.5212	1.9349	0.75838	0.36939											MnO	0.078	0.079
MgO		0.57541	0.63066	0.73428	0.94103											MgO	2.847	2.299
CaO		12.4506	12.8269	12.4711	11.3618											CaO	0	0
Cr2O3		2.9905e-07	2.9403e-07	2.9661e-07	2.9014e-07		GARNET RESORPTION (vol-%)									Na2O	0.438	0.322
Total		99.9521	99.9276	99.9776	100.057				Grt1	Grt2	Grt3	Grt4	Total			K2O	10.559	10.765
							Core		0	0	0	0	0			Total	95.555	94.93
Analyzed mole fractions							1		0.037	0	0	0	0.037			Structural Formula 11 O
							2		0	0	0	0	0			Si	3.398	3.266
XAlm		0.539	0.567	0.6	0.632		3		0	0	0	0	0			Ti	0.008	0.006
XGro		0.358	0.365	0.354	0.323											Al	2.163	2.393
XPrp		0.023	0.025	0.029	0.037		VOLUME OF GARNET (vol-%)									Fe	0.18	0.148
XSps		0.08	0.043	0.017	0.008				Grt1	Grt2	Grt3	Grt4	Total			Mn	0.004	0.005
							Core		1.827	0	0	0	1.827			Mg	0.284	0.231
Model							1		1.79	1.014	0	0	2.804			Ca	-0.001	-0.001
		490°C-0.58GPa	500°C-0.67GPa	510°C-0.73GPa	520°C-0.8GPa		2		1.79	1.014	1.007	0	3.811			Na	0.057	0.042
XAlm		0.52405	0.5898	0.62271	0.62658		3		1.79	1.014	1.007	1.006	4.817			K	0.901	0.925
XGro		0.34499	0.33462	0.32763	0.3187											XMg	0.612	0.609
XPrp		0.034969	0.043156	0.04966	0.054714		NEWLY GROWN GARNET (vol-%)
XSps		0.095996	0.032422	0	0				Grt1	Grt2	Grt3	Grt4	Total		Model	Si	3.17
							Core		1.827	0	0	0	1.827		520°C-0.8GPa	Al	2.66
Structural Formula 12 O							1		0	1.014	0	0	1.014		Bulk Rim3	XMg	0.46
Si		3.051	2.992	3.009	2.998		2		0	0	1.007	0	1.007		350°C-0.8GPa	Si	3.44
Ti		0.006	0.006	0.006	0.005		3		0	0	0	1.006	1.006		Bulk Less Grt	Al	2.11
Al		1.976	2	1.982	1.993											XMg	0.46
Fe3		0	0.006	0	0.001		ROCK DENSITY (g/ccm)								350°C-0.45GPa	Si	3.26
Fe2		1.598	1.698	1.801	1.896				Density						Bulk Less Grt	Al	2.47
Mn		0.238	0.131	0.051	0.025		Core		2.806							XMg	0.39
Mg		0.068	0.075	0.087	0.112		1		2.819
Ca		1.063	1.094	1.064	0.97		2		2.831
Cr		0	0	0	0		3		2.847
Assemblages Theriak
CORE	490°C-0.58GPa	Vol%	Ms 34%; Qz 28%; Ab 20.2%; Bt 9%; Chl 5.4%; Grt 1.8%; Ttn 1.4%
1	500°C-0.67GPa	Vol%
2	510°C-0.73GPa	Vol%
3	520°C-0.8GPa	Vol%	Ms 38.2%; Qz 29.3%; Ab 16.8%; Bt 9%; Chl 3.6%; Grt 1.4%; Ttn 1.5%
Extimated in thin section			Qz 35%; Phe 35%; Ab 15%; Grt 5 % (TOTAL); remaining 10%: chlorite, epidote, k-feldspar, biotite, titanite, zircon, opaques, apatite
Bulk
Pre	XRF	SI(1.0058)AL(0.37348)FE(0.076688)MN(0.0015506)MG(0.052854)CA(0.037447)NA(0.055824)TI(0.0091182)K(0.097665)H(1)O(?)O(0)
1	less %Grt core	SI(1.0155)AL(0.37245)FE(0.069965)MN(0.00029352)MG(0.053866)CA(0.03262)NA(0.057284)TI(0.0093244)K(0.10022)H(1)O(?)O(0)
2	less %Grt core and Rim1	SI(1.0338)AL(0.37643)FE(0.066664)MN(0)MG(0.055094)CA(0.030165)NA(0.058833)TI(0.0095587)K(0.10293)H(1)O(?)O(0)
3	less %Grt core, Rim1 and 2	SI(1.0618)AL(0.38397)FE(0.063646)MN(0)MG(0.056806)CA(0.028057)NA(0.06094)TI(0.009883)K(0.10661)H(1)O(?)O(0)
