# Supplementary material for: Deeply subducted continental fragments – Part 2: Insight from petrochronology in the central Sesia Zone (western Italian Alps)
Source: Copernicus journal article supplement (doi:10.5194/se-9-191-2018), 2018-02-26
Supplement: Supplementary file 2 [file se-9-191-2018-supplement.zip › S9 Secondary standard age data.xlsx]

## Sheet: Sheet1
	Th-Age	2σ	238U-Age	2σ
IC - FG1324	281.675	5.4418	281.832	17.1791
	238.064	4.6591	231.649	15.9949
	271.36	5.2814	282.108	12.8274
	272.687	13.3554	265.399	19.8969
	272.829	13.4942	304.925	25.7883
	274.743	13.2313	296.248	19.9571
	276.336	11.4316	303.588	18.9423
	279.938	10.75	301.294	24.1298
	280.967	10.5632	331.938	27.1069
IC - FG1315	269.89	5.5441	278.345	16.2478
	275.994	6.0384	277.29	19.8286
	273.673	5.4098	278.922	18.6422
	271.469	6.1039	290.627	24.1457
	275.746	7.9946	292.638	26.0603
	274.541	6.2223	298.124	21.9667
	269.814	8.2754	303.986	24.7306
	272.966	8.6015	287.999	20.1022
	271.761	7.7701	289.252	23.5134
IC - FG12157	282.723	7.7139	195.215	10.7296
	273.046	7.5664	282.032	15.6452
	274.493	7.6539	272.608	17.7936
	276.379	10.5276	260.921	40.0376
	272.68	9.8615	274.25	16.3802
	324.155	19.404	136.065	15.2821
	235.522	8.5725	262.294	13.0247
	274.483	10.8717	281.72	22.6668
	272.594	11.8347	292.363	28.1486
	279.881	11.7546	298.116	12.2547
	272.322	9.8406	289.748	18.4551
	277.398	9.7211	298.409	25.6926
	276.334	9.7007	296.691	25.6359
	273.692	8.0672	277.728	47.6159
	275.93	9.2251	284.157	28.8259
	278.978	7.4992	309.642	30.0587
IC -FG1347	271.247	9.004	256.457	15.2164
	275.995	9.6707	283.949	27.1305
	276.923	9.07	258.837	17.4544
	269.903	8.6756	283.002	16.1655
	272.807	8.713	330.697	30.3424
	275.064	9.1852	274.939	11.1329
	274.332	8.7259	290.561	26.1053
	271.955	5.9701	284.189	21.8412
	271.01	6.0638	304.741	25.3232
IC - FG1249	281.778	4.9517	287.794	16.7134
	275.829	4.5847	286.079	14.8426
	275.091	4.3832	295.822	14.7739
	275.756	6.2115	341.072	31.4143
	281.032	5.8067	292.701	23.8768
	275.473	5.4262	320.484	32.8785
	276.753	5.2011	274.186	19.7446
	276.13	4.8967	303.007	20.6573
	280.795	4.4013	296.975	24.3052
	276.758	4.4747	298.578	28.8698
EC - FG12107	279.06	5.9587	286.572	16.5004
	277.466	6.0629	309.327	18.6438
	277.952	5.9067	307.453	19.4596
	274.784	6.3775	314.196	16.4434
	280.664	6.6894	321.714	18.823
	274.926	6.6182	289.46	18.0748
	273.692	8.0595	277.728	47.625
	275.93	9.2207	284.157	28.8577
	278.978	7.5044	309.642	30.0972
EC - FG1420	272.776	6.9037	282.092	15.2491
	278.222	7.1482	318.948	16.6047
	279.731	6.9697	300.307	16.8419
	279.556	6.1664	294.144	18.1849
	280.133	6.2072	295.27	19.0723
	281.998	5.7643	305.613	18.111
