# Supplementary material for: Deeply subducted continental fragments – Part 2: Insight from petrochronology in the central Sesia Zone (western Italian Alps)
Source: Copernicus journal article supplement (doi:10.5194/se-9-191-2018), 2018-02-26
Supplement: Supplementary file 2 [file se-9-191-2018-supplement.zip › S10 Zircon age data.xlsx]

## Sheet: EMC_overview
	Alpine					Carboniferous-Triassic					Detrital
Sample	# analyses	Max (Ma)	Min (Ma)	Weighted mean age		# analyses	Max (Ma)	Min (Ma)	Weighted mean age		# detrital core analyses	Max (Ma)	Min (Ma)
FG 1249	–	–	–	–		5	300±17	277±15	294.2±2.8 Ma (MSWD=0.89; n=11); 279.5±2.3 Ma (MSWD=1.14; n=13)		11	793±20	414±17
FG 12157	4	65±6	60±9	61.4±3.3 Ma (MSWD=0.49; n=4)		24	302±14	268±16	285±11 Ma (MSWD=1.3; n=5)		–	–	–
FG 1315	16	68±6	58±6	63.9±1.6 Ma (MSWD=1.5; n=16)		12	313±13	222±13	285.8±5.6 Ma (MSWD=0.39; n=6)		6	696±50	353±25
FG 1347	1	56±4		–		9	299±21	247±11	295.7±7.6 Ma (MSWD=0.068; n=5)		–	–	–
FG 1324	13	77±3	63±6	71.7±0.6 Ma (MSWD=0.91; n=8)		–	–	–	–		10	594±17	423±14
The errors are given as 2 Standard Error for individual dates, as 95% confidence level for weighted mean ages.

## Sheet: AlpineAges
n=34	Element concentration			Age		Data for Wetherill plot					Data for Tera-Wasserburg plot
Sample	U(ppm)	Th (ppm)	Th/U	206Pb/238U	2 SE	207Pb/235U	2 SE	206Pb/238U	2 SE	Rho	238U/206Pb	2 SE	207Pb/206Pb	2 SE	Rho		Source file
FG12157_11f core	228	0.61	0.00267544	64.7	6.4	0.057	0.024	0.0101	0.001	0.2179	99.0099	9.80296	0.033	0.016			22Mayc_22
FG12157_9b	231	0.45	0.00194805	60.2	5.7	0.048	0.021	0.0094	0.00089	-0.01863	106.383	10.0724	0.028	0.016			22Mayc_18
FG12157_5a	151.8	0.21	0.0013834	60.1	8.7	0.042	0.03	0.0094	0.0014	0.14832	106.383	15.8443	0.031	0.027			22Mayc_09
FG12157_5d	141.1	0.73	0.00517364	60	7.2	0.056	0.029	0.0093	0.0011	0.00030864	107.527	12.7182	0.025	0.021			22Mayc_11
FG1315_22a rim	419	4.37	0.0104296	68.2	6	0.071	0.026	0.01065	0.00094	0.09713	93.8967	8.2876	0.046	0.021			21Maye_10
FG1315_26a	675	3.22	0.00477037	68	4.3	0.062	0.016	0.01061	0.00067	-0.12963	94.2507	5.95174	0.054	0.016	0.64258		21Maye_18
FG1315_11c	389	0.98	0.00251928	67.4	6	0.062	0.023	0.01051	0.00094	-0.051866	95.1475	8.50986	0.071	0.028	-0.98445		21Mayd_07
FG1315_33b rim	537	1.6	0.00297952	66.6	4.5	0.078	0.02	0.01039	0.00071	-0.040413	96.2464	6.57699	0.064	0.016	0.41622		21Mayf_07
FG1315_26b	484	1.59	0.00328512	66.3	4.6	0.06	0.019	0.01035	0.00072	0.11333	96.6184	6.72128	0.037	0.014			21Maye_19
FG1315_32a rim	668	3.18	0.00476048	65.6	4.3	0.06	0.015	0.01023	0.00068	0.020024	97.7517	6.49767	0.051	0.014	0.37301		21Maye_24
FG1315_15a rim2	672	1.41	0.00209821	65.2	5.7	0.076	0.025	0.01018	0.00089	0.033938	98.2318	8.58805	0.053	0.018	0.14663		21Mayd_11
FG1315_44a rim	868	1.79	0.00206221	64.2	3.6	0.061	0.014	0.01001	0.00057	0.08527	99.9001	5.68862	0.05	0.011	0.35037		21Mayf_18
FG1315_2c rim	400	1.94	0.00485	63.5	5.3	0.052	0.021	0.00991	0.00082	0.011485	100.908	8.34962	0.034	0.018	0.21668		21Mayc_09
FG1315_15b rim2	673	3.4	0.00505201	63.2	5.2	0.074	0.021	0.0098	0.00082	0.051024	102.041	8.53811	0.056	0.017	0.30807		21Mayd_18
FG1315_8 rim	430	1.65	0.00383721	61.9	5.1	0.071	0.023	0.00965	0.0008	-0.021803	103.627	8.59084	0.065	0.021	0.2362		21Mayc_21
FG1315_1a rim	660	2.45	0.00371212	61.7	4.4	0.062	0.015	0.00957	0.0007	0.10484	104.493	7.64318	0.049	0.013	0.037883		21Mayc_07
FG1315_49b rim 2	269	0.94	0.00349442	61.7	6.6	0.057	0.027	0.0096	0.001	0.14191	104.167	10.8507	0.035	0.021			21Mayf_24
FG1315_10d rim1	569	1.45	0.00254833	61	4.4	0.056	0.019	0.00951	0.00069	-0.054331	105.153	7.62936	0.047	0.016	0.37464		21Mayc_24
FG1315_17a rim	914	4.63	0.00506565	59.5	4.6	0.056	0.015	0.00928	0.00072	0.084354	107.759	8.36058	0.043	0.012	0.29341		21Mayd_21
FG1315_45a	319	0.77	0.00241379	57.8	5.5	0.055	0.019	0.00902	0.00086	-0.060205	110.865	10.5702	0.053	0.02			21Mayf_19
FG1324_1a rim2	1048	2.94	0.00280534	77.1	2.8	0.08	0.014	0.01203	0.00044	-0.14358	83.1255	3.04033	0.05	0.01	0.49077		27Marc_07
FG1324_37a rim	716	1.64	0.0022905	75.6	3.9	0.086	0.018	0.01179	0.00061	0.071131	84.8176	4.38836	0.061	0.015	0.50077		27Marc_22
FG1324_29b rim2	1476	5.35	0.00362466	73.3	2.9	0.077	0.013	0.01144	0.00045	-0.076285	87.4126	3.43843	0.0486	0.0098	0.41847		27Marc_21
FG1324_8b rim2	1197	2.84	0.0023726	72.7	1.7	0.0743	0.0051	0.01135	0.00027	0.26012	88.1057	2.09591	0.0463	0.003	0.11819		27Marb_11
FG1324_18a rim	1211	3.57	0.00294798	72.1	1.6	0.0706	0.0044	0.01125	0.00026	0.14824	88.8889	2.05432	0.0464	0.003	0.24439		27Marb_12
FG1324_22a rim2	931	3.43	0.00368421	72.1	2.7	0.076	0.013	0.01125	0.00043	-0.1166	88.8889	3.39753	0.053	0.011	0.48182		27Marc_17
FG1324_4b rim	1792	5.56	0.00310268	71.8	1.4	0.071	0.0047	0.0112	0.00021	0.10192	89.2857	1.67411	0.0459	0.0031	0.29853		27Marb_10
FG1324_29a rim	1302	3.46	0.00265745	71.8	1.5	0.0757	0.005	0.0112	0.00023	0.16127	89.2857	1.83355	0.0486	0.0032	0.20732		27Marb_20
FG1324_2a rim	1198	3.16	0.00263773	71.1	1.6	0.0699	0.0047	0.0111	0.00025	0.093638	90.0901	2.02906	0.0465	0.0033	0.20583		27Marb_09
FG1324_31a rim	1255	3.25	0.00258964	70	2	0.0764	0.0057	0.01092	0.00032	0.24763	91.5751	2.68352	0.0504	0.0036	0.25093		27Marb_21
FG1324_22b rim2	752	2.02	0.00268617	69.2	3.5	0.068	0.013	0.0108	0.00055	0.11251	92.5926	4.71536	0.047	0.01	0.11448		27Marc_18
FG1324_18b rim2	290	0.51	0.00175862	64.8	5	0.06	0.018	0.01012	0.00078	-0.013621	98.8142	7.61612	0.06	0.019	0.35471		27Marc_12
FG1324_39a rim2	237	0.152	0.00064135	63	5.6	0.066	0.02	0.00984	0.00088	0.12807	101.626	9.08851	0.055	0.018			27Marc_23
FG1347_10a rim	951	3.65	0.00383807	55.7	3.8	0.057	0.012	0.00868	0.00059	0.10419	115.207	7.83092	0.048	0.01	0.1522		27Mard_10
